# Supplementary material
Source: HighWire-hosted journal article supplement (https://gut.bmj.com/content/69/3/578)
Supplement: inline-supplementary-material-3 [file inline-supplementary-material-3.pdf]

Supplementary Table 1

| Transcript Cluster id | Gene         | Fold change | p-value  | q-value  |
|-----------------------|--------------|-------------|----------|----------|
| 17459744              | Reg3b        | 187.07      | 7.21E-15 | 1.22E-10 |
| 17467973              | Reg3g        | 90.08       | 9.77E-13 | 4.13E-09 |
| 17399823              | S100a8       | 32.84       | 3.18E-13 | 2.69E-09 |
| 17346150              | Lrg1         | 26.64       | 6.51E-13 | 3.67E-09 |
| 17254047              | Ccl7         | 10.17       | 4.65E-11 | 6.55E-08 |
| 17438955              | Cxcl5        | 9.18        | 2.00E-12 | 5.63E-09 |
| 17326062              | Retnlb       | 7.36        | 4.76E-10 | 2.78E-07 |
| 17254289              | Gm11428      | 7.28        | 2.48E-09 | 8.91E-07 |
| 17407363              | S100a9       | 7.24        | 3.15E-10 | 2.22E-07 |
| 17505478              | Tat          | 7.12        | 3.72E-11 | 5.72E-08 |
| 17315743              | Osmr         | 6.19        | 2.29E-09 | 8.43E-07 |
| 17490912              | Fut2         | 6.02        | 1.92E-12 | 5.63E-09 |
| 17491193              | Saa3         | 5.93        | 7.39E-07 | 6.95E-05 |
| 17318089              | Ly6c1        | 5.49        | 4.74E-09 | 1.50E-06 |
| 17410905              | Al747448     | 5.41        | 2.22E-10 | 1.76E-07 |
| 17253707              | Nos2         | 4.96        | 4.46E-08 | 8.38E-06 |
| 17399374              | Muc1         | 4.79        | 1.27E-09 | 5.52E-07 |
| 17254166              | Sfn2         | 4.62        | 5.41E-08 | 9.64E-06 |
| 17261608              | Gabrp        | 4.57        | 2.41E-10 | 1.77E-07 |
| 17429632              | Mfsd2a       | 4.43        | 1.13E-11 | 2.16E-08 |
| 17390738              | Duox2        | 4.37        | 9.35E-10 | 4.16E-07 |
| 17395777              | Ptk6         | 4.29        | 6.25E-08 | 1.03E-05 |
| 17408885              | Chi3l7       | 4.24        | 8.20E-07 | 7.47E-05 |
| 17378827              | Lbp          | 4.23        | 2.17E-09 | 8.33E-07 |
| 17395079              | Zbp1         | 4.14        | 2.10E-10 | 1.76E-07 |
| 17455954              | Tac1         | 4.12        | 1.49E-08 | 3.59E-06 |
| 17353663              | Tmem173      | 3.98        | 9.16E-11 | 1.04E-07 |
| 17548166              | LOC100862491 | 3.94        | 1.28E-05 | 6.42E-04 |
| 17344765              | Trim15       | 3.77        | 6.31E-11 | 8.20E-08 |
| 17393789              | Tgm2         | 3.69        | 1.93E-10 | 1.72E-07 |
| 17438975              | Cxcl3        | 3.49        | 2.43E-05 | 1.05E-03 |
| 17504074              | Cpne2        | 3.39        | 1.15E-11 | 2.16E-08 |
| 17399883              | Sprr2h       | 3.34        | 1.56E-06 | 1.23E-04 |
| 17272619              | Socs3        | 3.33        | 4.92E-09 | 1.50E-06 |
| 17308099              | Adam28       | 3.28        | 7.85E-07 | 7.33E-05 |
| 17512868              | Chst4        | 3.25        | 8.77E-10 | 4.01E-07 |
| 17452054              | Oas2         | 3.06        | 1.22E-07 | 1.62E-05 |
| 17438963              | Ppbp         | 3.05        | 1.19E-05 | 6.09E-04 |
| 17545764              | Ppef1        | 2.95        | 3.63E-06 | 2.37E-04 |
| 17254295              | Expi         | 2.86        | 7.35E-08 | 1.14E-05 |
| 17353650              | Eccscr       | 2.85        | 3.37E-10 | 2.28E-07 |
| 17482943              | Il4ra        | 2.84        | 1.14E-08 | 2.93E-06 |

|          |               |      |          |          |
|----------|---------------|------|----------|----------|
| 17254176 | Slnf4         | 2.81 | 1.22E-06 | 9.79E-05 |
| 17401261 | Bcl2l15       | 2.77 | 3.45E-06 | 2.31E-04 |
| 17269333 | Krt36         | 2.76 | 9.23E-07 | 8.09E-05 |
| 17344774 | Trim40        | 2.75 | 9.87E-08 | 1.42E-05 |
| 17437213 | Cd38          | 2.73 | 4.43E-10 | 2.78E-07 |
| 17514592 | Mmp7          | 2.67 | 8.64E-07 | 7.70E-05 |
| 17357971 | Gna14         | 2.66 | 1.13E-07 | 1.54E-05 |
| 17286190 | Prl2a1        | 2.61 | 5.71E-05 | 1.95E-03 |
| 17394153 | Slpi          | 2.61 | 5.69E-10 | 3.11E-07 |
| 17497525 | Adam8         | 2.58 | 9.29E-08 | 1.38E-05 |
| 17526836 | Tex12         | 2.58 | 6.61E-05 | 2.19E-03 |
| 17499962 | Plat          | 2.56 | 1.61E-08 | 3.77E-06 |
| 17334192 | Prss27        | 2.54 | 3.46E-07 | 3.81E-05 |
| 17420539 | Pla2g2a       | 2.51 | 4.96E-06 | 3.03E-04 |
| 17329195 | Thpo          | 2.50 | 2.37E-07 | 2.85E-05 |
| 17363470 | Gda           | 2.49 | 4.65E-10 | 2.78E-07 |
| 17318070 | 2010109I03Rik | 2.48 | 2.29E-10 | 1.76E-07 |
| 17213666 | Klf7          | 2.47 | 2.15E-05 | 9.60E-04 |
| 17431820 | Pla2g5        | 2.46 | 3.54E-07 | 3.86E-05 |
| 17390810 | Gatm          | 2.46 | 1.21E-05 | 6.15E-04 |
| 17286707 | Gcnt2         | 2.45 | 6.22E-08 | 1.03E-05 |
| 17319364 | D730005E14Rik | 2.43 | 5.84E-08 | 9.98E-06 |
| 17509565 | Anxa10        | 2.42 | 1.09E-04 | 3.14E-03 |
| 17384457 | Stom          | 2.40 | 6.48E-10 | 3.23E-07 |
| 17341671 | Prss22        | 2.40 | 1.59E-08 | 3.77E-06 |
| 17516412 | 2610203C20Rik | 2.39 | 1.16E-05 | 6.02E-04 |
| 17347163 | Xdh           | 2.38 | 4.53E-08 | 8.38E-06 |
| 17520624 | Rbp1          | 2.37 | 5.48E-06 | 3.31E-04 |
| 17428253 | Slc5a9        | 2.35 | 2.19E-07 | 2.68E-05 |
| 17531701 | Gm20317       | 2.32 | 3.84E-05 | 1.48E-03 |
| 17491941 | Aldh1a3       | 2.29 | 1.75E-09 | 7.21E-07 |
| 17242785 | Sbno2         | 2.29 | 1.17E-08 | 2.96E-06 |
| 17430576 | Tinagl1       | 2.27 | 1.21E-08 | 3.02E-06 |
| 17463443 | Clec2h        | 2.24 | 6.02E-10 | 3.18E-07 |
| 17257165 | Arf2          | 2.23 | 3.04E-08 | 5.94E-06 |
| 17410332 | Ccdc109b      | 2.21 | 1.20E-06 | 9.72E-05 |
| 17545785 | Cdkl5         | 2.21 | 4.49E-07 | 4.54E-05 |
| 17533713 | Timp1         | 2.20 | 6.89E-05 | 2.25E-03 |
| 17438987 | Cxcl1         | 2.19 | 5.29E-07 | 5.23E-05 |
| 17238172 | Rdh16         | 2.19 | 4.11E-05 | 1.54E-03 |
| 17269404 | Krt16         | 2.18 | 1.43E-04 | 3.83E-03 |
| 17267418 | A130040M12Rik | 2.17 | 4.73E-04 | 9.45E-03 |
| 17352862 | Aqp4          | 2.17 | 2.16E-07 | 2.66E-05 |
| 17402519 | Tifa          | 2.16 | 1.66E-04 | 4.32E-03 |
| 17284839 | Itgb8         | 2.14 | 3.01E-06 | 2.08E-04 |

|          |               |      |          |          |
|----------|---------------|------|----------|----------|
| 17410880 | Clca4         | 2.14 | 3.41E-09 | 1.20E-06 |
| 17543870 | Zdhhc15       | 2.11 | 2.92E-05 | 1.20E-03 |
| 17377778 | Id1           | 2.11 | 4.56E-09 | 1.48E-06 |
| 17391554 | Il1a          | 2.09 | 2.24E-04 | 5.38E-03 |
| 17276934 | Ttc9          | 2.09 | 2.49E-05 | 1.07E-03 |
| 17318036 | Gml           | 2.08 | 1.11E-05 | 5.80E-04 |
| 17470060 | Rassf4        | 2.07 | 6.80E-05 | 2.23E-03 |
| 17469541 | Il5ra         | 2.06 | 1.06E-07 | 1.48E-05 |
| 17318020 | Ly6d          | 2.03 | 1.11E-07 | 1.52E-05 |
| 17320583 | Cpne8         | 2.02 | 1.94E-06 | 1.45E-04 |
| 17468018 | Hk2           | 2.01 | 2.30E-08 | 4.87E-06 |
| 17264835 | Cd68          | 2.00 | 4.40E-07 | 4.48E-05 |
| 17226447 | Nckap5        | 2.00 | 1.15E-04 | 3.26E-03 |
| 17282069 | Gpx2          | 2.00 | 5.02E-04 | 9.89E-03 |
| 17258887 | Pgs1          | 1.99 | 8.30E-07 | 7.51E-05 |
| 17515074 | Icam1         | 1.99 | 9.81E-07 | 8.46E-05 |
| 17401345 | Ppm1j         | 1.99 | 1.70E-07 | 2.16E-05 |
| 17307425 | LOC100862065  | 1.98 | 8.89E-05 | 2.69E-03 |
| 17381630 | Pfkfb3        | 1.98 | 4.52E-07 | 4.55E-05 |
| 17445325 | Fzd1          | 1.97 | 2.24E-08 | 4.86E-06 |
| 17330080 | Dirc2         | 1.97 | 5.74E-08 | 9.98E-06 |
| 17313050 | Apobec3       | 1.96 | 3.22E-07 | 3.65E-05 |
| 17330967 | Nfkbiz        | 1.95 | 1.09E-06 | 9.08E-05 |
| 17484601 | 1190003J15Rik | 1.94 | 8.20E-07 | 7.47E-05 |
| 17261107 | Rel           | 1.93 | 1.77E-07 | 2.20E-05 |
| 17260236 | Myl7          | 1.93 | 6.65E-05 | 2.20E-03 |
| 17404464 | Tmem212       | 1.92 | 2.20E-04 | 5.31E-03 |
| 17254041 | Ccl2          | 1.92 | 3.28E-04 | 7.15E-03 |
| 17344132 | Hspa1a        | 1.90 | 2.12E-06 | 1.55E-04 |
| 17491163 | Tph1          | 1.90 | 4.27E-05 | 1.58E-03 |
| 17270583 | Nsf           | 1.89 | 7.20E-09 | 2.06E-06 |
| 17418271 | Fhl3          | 1.89 | 6.76E-08 | 1.09E-05 |
| 17356447 | Efemp2        | 1.89 | 1.61E-06 | 1.25E-04 |
| 17371427 | Dhrs9         | 1.89 | 6.42E-08 | 1.04E-05 |
| 17489399 | Fxyd5         | 1.88 | 2.16E-04 | 5.24E-03 |
| 17297125 | Ptprg         | 1.87 | 4.34E-06 | 2.74E-04 |
| 17439830 | Spp1          | 1.86 | 4.12E-05 | 1.54E-03 |
| 17282664 | Pgf           | 1.85 | 6.81E-05 | 2.23E-03 |
| 17230102 | Ifi202b       | 1.85 | 2.58E-04 | 5.91E-03 |
| 17410204 | Alpk1         | 1.85 | 6.56E-06 | 3.80E-04 |
| 17410845 | Clca1         | 1.84 | 1.85E-04 | 4.70E-03 |
| 17388999 | Prrg4         | 1.84 | 3.79E-07 | 4.03E-05 |
| 17306906 | Ripk3         | 1.83 | 5.08E-08 | 9.15E-06 |
| 17212947 | Spats2l       | 1.83 | 6.71E-07 | 6.45E-05 |
| 17238162 | Rdh9          | 1.82 | 1.03E-05 | 5.45E-04 |

|          |             |      |          |          |
|----------|-------------|------|----------|----------|
| 17379169 | Sgk2        | 1.81 | 9.94E-07 | 8.53E-05 |
| 17438113 | Cwh43       | 1.81 | 8.08E-08 | 1.24E-05 |
| 17327514 | B3galt5     | 1.80 | 1.56E-05 | 7.52E-04 |
| 17421312 | Dhrs3       | 1.80 | 1.15E-07 | 1.55E-05 |
| 17239142 | Samd5       | 1.79 | 7.67E-06 | 4.28E-04 |
| 17353747 | Cd14        | 1.79 | 2.70E-06 | 1.91E-04 |
| 17246810 | Lif         | 1.79 | 3.68E-05 | 1.44E-03 |
| 17487457 | Bcl3        | 1.79 | 6.05E-08 | 1.01E-05 |
| 17230111 | Ifi205      | 1.78 | 7.04E-06 | 4.01E-04 |
| 17419553 | Map3k6      | 1.77 | 8.30E-06 | 4.59E-04 |
| 17330870 | Gm4827      | 1.77 | 2.27E-06 | 1.65E-04 |
| 17348105 | Bambi       | 1.77 | 4.12E-05 | 1.54E-03 |
| 17513076 | Mkl1        | 1.76 | 7.08E-07 | 6.69E-05 |
| 17350267 | Myot        | 1.76 | 1.24E-04 | 3.42E-03 |
| 17521194 | Dusp7       | 1.76 | 3.49E-06 | 2.32E-04 |
| 17400622 | Lix1l       | 1.76 | 1.21E-04 | 3.37E-03 |
| 17359113 | O3far1      | 1.75 | 2.81E-06 | 1.97E-04 |
| 17338959 | Tnfsf9      | 1.73 | 2.20E-04 | 5.31E-03 |
| 17261575 | Ranbp17     | 1.72 | 3.29E-04 | 7.18E-03 |
| 17370807 | Fmn12       | 1.72 | 6.28E-05 | 2.11E-03 |
| 17383892 | Lcn2        | 1.72 | 9.28E-05 | 2.78E-03 |
| 17545936 | Car5b       | 1.71 | 2.34E-05 | 1.02E-03 |
| 17306098 | Rnase1      | 1.71 | 6.79E-05 | 2.23E-03 |
| 17230195 | Cep170      | 1.71 | 1.91E-04 | 4.79E-03 |
| 17228624 | Rasal2      | 1.71 | 2.12E-05 | 9.53E-04 |
| 17283445 | Lgmn        | 1.70 | 5.16E-05 | 1.82E-03 |
| 17534051 | Ii13ra1     | 1.69 | 5.73E-07 | 5.63E-05 |
| 17419020 | Marcks1     | 1.69 | 1.03E-04 | 3.01E-03 |
| 17355366 | Smad4       | 1.69 | 4.21E-07 | 4.39E-05 |
| 17429689 | Macf1       | 1.69 | 1.09E-04 | 3.15E-03 |
| 17364126 | Gm14446     | 1.68 | 2.03E-04 | 4.98E-03 |
| 17313811 | Fbln1       | 1.68 | 1.23E-05 | 6.24E-04 |
| 17351465 | Tubb6       | 1.68 | 2.67E-04 | 6.10E-03 |
| 17344126 | Hspa1b      | 1.68 | 1.59E-04 | 4.19E-03 |
| 17286283 | Dusp22      | 1.68 | 2.02E-05 | 9.18E-04 |
| 17340584 | Tmem181c-ps | 1.68 | 1.21E-04 | 3.37E-03 |
| 17268066 | Gm11545     | 1.68 | 7.23E-06 | 4.09E-04 |
| 17460831 | Aldh1l1     | 1.68 | 2.62E-06 | 1.86E-04 |
| 17344309 | Tnf         | 1.68 | 3.46E-06 | 2.31E-04 |
| 17458682 | Creb5       | 1.67 | 4.66E-05 | 1.67E-03 |
| 17244913 | Zdhhc17     | 1.67 | 1.35E-05 | 6.78E-04 |
| 17259026 | Card14      | 1.67 | 8.38E-06 | 4.62E-04 |
| 17321318 | Fkbp11      | 1.66 | 1.24E-04 | 3.42E-03 |
| 17480924 | Gm19765     | 1.66 | 8.06E-05 | 2.51E-03 |
| 17482133 | Tmc5        | 1.66 | 1.54E-05 | 7.47E-04 |

|          |               |      |          |          |
|----------|---------------|------|----------|----------|
| 17330099 | Parp14        | 1.66 | 4.17E-07 | 4.38E-05 |
| 17235077 | Cnn2          | 1.65 | 5.66E-05 | 1.95E-03 |
| 17506230 | 6430548M08Rik | 1.65 | 1.06E-05 | 5.59E-04 |
| 17267420 | Ypel2         | 1.65 | 3.86E-04 | 8.04E-03 |
| 17390778 | Duoxa1        | 1.65 | 1.14E-04 | 3.24E-03 |
| 17426944 | Fam154a       | 1.64 | 5.61E-05 | 1.94E-03 |
| 17223985 | Ikzf2         | 1.64 | 1.11E-05 | 5.80E-04 |
| 17438995 | Cxcl2         | 1.64 | 2.31E-05 | 1.02E-03 |
| 17332554 | Fam3b         | 1.64 | 9.45E-07 | 8.20E-05 |
| 17404432 | Fndc3b        | 1.64 | 2.75E-06 | 1.94E-04 |
| 17337228 | Ier3          | 1.63 | 6.95E-07 | 6.61E-05 |
| 17292891 | Pdlim7        | 1.63 | 2.37E-06 | 1.70E-04 |
| 17276328 | Hif1a         | 1.63 | 3.44E-07 | 3.81E-05 |
| 17437598 | 0610040J01Rik | 1.62 | 3.08E-05 | 1.26E-03 |
| 17462202 | Rasgef1a      | 1.62 | 1.35E-05 | 6.78E-04 |
| 17478277 | Zdhhc13       | 1.61 | 3.10E-07 | 3.54E-05 |
| 17325274 | Parp9         | 1.61 | 4.66E-06 | 2.90E-04 |
| 17373550 | Trp53i11      | 1.61 | 2.61E-07 | 3.06E-05 |
| 17285559 | Elmo1         | 1.61 | 1.04E-04 | 3.02E-03 |
| 17500327 | Eif4ebp1      | 1.61 | 8.21E-07 | 7.47E-05 |
| 17445089 | Fry           | 1.60 | 4.05E-04 | 8.35E-03 |
| 17522555 | Ltf           | 1.60 | 1.55E-04 | 4.11E-03 |
| 17320322 | Mapk11        | 1.60 | 6.41E-05 | 2.14E-03 |
| 17350281 | Dcp2          | 1.59 | 3.86E-05 | 1.48E-03 |
| 17362869 | AW112010      | 1.59 | 4.37E-07 | 4.48E-05 |
| 17270508 | Plekhm1       | 1.59 | 5.50E-06 | 3.31E-04 |
| 17223903 | Acadl         | 1.59 | 2.02E-06 | 1.50E-04 |
| 17248270 | Hbq1b         | 1.58 | 1.77E-04 | 4.54E-03 |
| 17212138 | Map4k4        | 1.58 | 7.02E-06 | 4.01E-04 |
| 17447803 | Fbxl5         | 1.58 | 3.08E-05 | 1.26E-03 |
| 17424077 | B4galt1       | 1.58 | 1.61E-06 | 1.25E-04 |
| 17482095 | Nucb2         | 1.58 | 4.36E-07 | 4.48E-05 |
| 17402361 | Sec24d        | 1.58 | 6.38E-05 | 2.14E-03 |
| 17244341 | Elk3          | 1.57 | 1.01E-05 | 5.42E-04 |
| 17301147 | Fam124a       | 1.57 | 7.34E-05 | 2.39E-03 |
| 17343278 | Hsf2bp        | 1.57 | 2.45E-04 | 5.70E-03 |
| 17317015 | Ext1          | 1.57 | 5.93E-07 | 5.76E-05 |
| 17459196 | Tnip3         | 1.57 | 2.01E-06 | 1.50E-04 |
| 17211795 | Arid5a        | 1.56 | 4.97E-05 | 1.77E-03 |
| 17492239 | AU020206      | 1.56 | 1.55E-05 | 7.48E-04 |
| 17304246 | Appl1         | 1.56 | 1.53E-06 | 1.21E-04 |
| 17404947 | Ankrd50       | 1.56 | 4.25E-05 | 1.57E-03 |
| 17215565 | Sh3bp4        | 1.56 | 2.71E-05 | 1.14E-03 |
| 17349582 | 1700066B19Rik | 1.55 | 2.95E-04 | 6.59E-03 |
| 17407850 | Ecm1          | 1.55 | 1.93E-04 | 4.81E-03 |

|          |               |      |          |          |
|----------|---------------|------|----------|----------|
| 17420016 | Id3           | 1.55 | 1.17E-04 | 3.29E-03 |
| 17313998 | Crel2         | 1.55 | 4.27E-06 | 2.71E-04 |
| 17324883 | Muc4          | 1.54 | 8.75E-05 | 2.66E-03 |
| 17478301 | Nav2          | 1.54 | 1.75E-04 | 4.51E-03 |
| 17226708 | Il24          | 1.54 | 1.11E-06 | 9.11E-05 |
| 17468926 | LOC100861972  | 1.53 | 1.61E-04 | 4.23E-03 |
| 17215629 | Mlph          | 1.53 | 6.05E-05 | 2.04E-03 |
| 17443166 | Stx1a         | 1.53 | 1.75E-04 | 4.51E-03 |
| 17248288 | Sh3pxd2b      | 1.53 | 5.57E-06 | 3.33E-04 |
| 17316690 | Klf10         | 1.53 | 1.42E-04 | 3.81E-03 |
| 17521621 | Amigo3        | 1.52 | 1.46E-04 | 3.91E-03 |
| 17346155 | Sema6b        | 1.52 | 4.21E-05 | 1.56E-03 |
| 17474974 | Plaur         | 1.52 | 1.10E-06 | 9.08E-05 |
| 17390066 | Ehd4          | 1.52 | 3.22E-05 | 1.30E-03 |
| 17397426 | Ccrn4l        | 1.52 | 1.34E-04 | 3.64E-03 |
| 17536364 | Msn           | 1.52 | 2.01E-05 | 9.13E-04 |
| 17391332 | Mal           | 1.52 | 1.45E-05 | 7.15E-04 |
| 17538194 | Vsig1         | 1.51 | 1.57E-04 | 4.15E-03 |
| 17355298 | 2310002L13Rik | 1.51 | 1.52E-05 | 7.38E-04 |
| 17532472 | Cdcp1         | 1.51 | 1.74E-05 | 8.11E-04 |
| 17253431 | Flot2         | 1.51 | 3.63E-05 | 1.44E-03 |
| 17361850 | Cdc42ep2      | 1.51 | 9.88E-05 | 2.91E-03 |
| 17243617 | Ckap4         | 1.50 | 7.67E-06 | 4.28E-04 |
| 17336446 | Psm8          | 1.50 | 2.36E-04 | 5.55E-03 |
| 17364948 | Slc25a28      | 1.50 | 1.73E-05 | 8.07E-04 |
| 17439164 | Sep-11        | 1.50 | 7.63E-05 | 2.43E-03 |
| 17548059 | 4930578L24Rik | 1.50 | 3.57E-04 | 7.61E-03 |
| 17328124 | Litaf         | 1.50 | 1.03E-05 | 5.45E-04 |
| 17326166 | Cd47          | 1.49 | 2.08E-06 | 1.53E-04 |
| 17516194 | Vwa5a         | 1.49 | 3.09E-04 | 6.81E-03 |
| 17436607 | Sh3bp2        | 1.49 | 3.56E-05 | 1.42E-03 |
| 17227266 | Elf3          | 1.49 | 1.01E-05 | 5.42E-04 |
| 17274558 | Mboat2        | 1.49 | 1.17E-04 | 3.29E-03 |
| 17519967 | Tpbp          | 1.49 | 4.51E-05 | 1.64E-03 |
| 17291803 | 1300014I06Rik | 1.49 | 2.70E-05 | 1.13E-03 |
| 17399672 | Slc39a1       | 1.49 | 6.04E-05 | 2.04E-03 |
| 17326510 | Pros1         | 1.48 | 1.52E-05 | 7.38E-04 |
| 17283930 | Wars          | 1.48 | 3.27E-06 | 2.22E-04 |
| 17338258 | Al661453      | 1.48 | 5.80E-05 | 1.97E-03 |
| 17244140 | Apaf1         | 1.48 | 1.52E-04 | 4.05E-03 |
| 17361285 | Syt12         | 1.48 | 2.42E-05 | 1.05E-03 |
| 17370977 | Pkp4          | 1.48 | 2.38E-05 | 1.04E-03 |
| 17441037 | Oasl2         | 1.48 | 1.80E-04 | 4.60E-03 |
| 17433251 | H6pd          | 1.47 | 2.94E-04 | 6.58E-03 |
| 17516564 | Hyou1         | 1.47 | 4.28E-05 | 1.58E-03 |

|          |               |      |          |          |
|----------|---------------|------|----------|----------|
| 17439021 | Ereg          | 1.47 | 2.55E-04 | 5.85E-03 |
| 17406552 | Pear1         | 1.47 | 9.76E-05 | 2.89E-03 |
| 17501976 | Isyna1        | 1.47 | 5.35E-05 | 1.87E-03 |
| 17246967 | Xbp1          | 1.47 | 6.48E-06 | 3.76E-04 |
| 17370103 | Grp78 (Hspa5) | 1.46 | 6.98E-06 | 4.00E-04 |
| 17514435 | Casp4         | 1.46 | 3.19E-06 | 2.18E-04 |
| 17230595 | Degs1         | 1.46 | 1.18E-05 | 6.05E-04 |
| 17314011 | Pim3          | 1.46 | 1.33E-04 | 3.63E-03 |
| 17217610 | Csrp1         | 1.46 | 7.38E-05 | 2.39E-03 |
| 17530457 | Atp2c1        | 1.46 | 1.40E-04 | 3.77E-03 |
| 17512554 | Psmb10        | 1.45 | 5.89E-06 | 3.48E-04 |
| 17432674 | Tnfrsf1b      | 1.45 | 4.38E-04 | 8.89E-03 |
| 17450121 | Plac8         | 1.45 | 2.24E-05 | 9.90E-04 |
| 17319380 | Pdgfb         | 1.45 | 3.64E-04 | 7.72E-03 |
| 17528111 | Smad3         | 1.45 | 9.59E-05 | 2.84E-03 |
| 17496049 | Nsmce1        | 1.45 | 2.82E-05 | 1.17E-03 |
| 17518142 | Tle3          | 1.44 | 4.30E-04 | 8.78E-03 |
| 17249593 | Irf1          | 1.44 | 5.38E-05 | 1.87E-03 |
| 17329433 | Bcl6          | 1.44 | 7.60E-05 | 2.43E-03 |
| 17269717 | Stat3         | 1.44 | 4.58E-06 | 2.86E-04 |
| 17453160 | Gusb          | 1.44 | 1.88E-04 | 4.75E-03 |
| 17228136 | Lamc2         | 1.43 | 1.27E-04 | 3.49E-03 |
| 17316175 | Basp1         | 1.43 | 7.99E-05 | 2.49E-03 |
| 17543336 | Las1l         | 1.43 | 3.99E-05 | 1.51E-03 |
| 17348648 | Taf4b         | 1.43 | 3.38E-04 | 7.34E-03 |
| 17341681 | Kctd5         | 1.43 | 5.19E-05 | 1.83E-03 |
| 17509682 | BC030870      | 1.43 | 4.60E-04 | 9.25E-03 |
| 17343143 | Glo1          | 1.43 | 1.63E-05 | 7.77E-04 |
| 17315438 | Prr13         | 1.43 | 4.75E-05 | 1.70E-03 |
| 17282226 | Actn1         | 1.43 | 6.98E-05 | 2.27E-03 |
| 17358598 | Il33          | 1.43 | 7.41E-05 | 2.40E-03 |
| 17289889 | Il6st         | 1.43 | 3.00E-04 | 6.66E-03 |
| 17464718 | Asns          | 1.43 | 1.71E-05 | 8.03E-04 |
| 17218060 | Ptgs2         | 1.42 | 8.43E-05 | 2.58E-03 |
| 17244070 | Nr1h4         | 1.42 | 1.19E-04 | 3.32E-03 |
| 17418916 | Rnf19b        | 1.42 | 2.68E-04 | 6.11E-03 |
| 17266520 | Lgals9        | 1.42 | 1.73E-04 | 4.47E-03 |
| 17354595 | 2010002N04Rik | 1.42 | 4.21E-04 | 8.64E-03 |
| 17456554 | Hilpda        | 1.42 | 2.07E-04 | 5.06E-03 |
| 17214665 | Sgpp2         | 1.42 | 2.92E-05 | 1.20E-03 |
| 17427860 | Acot11        | 1.42 | 1.12E-05 | 5.80E-04 |
| 17516546 | Dpagt1        | 1.42 | 1.85E-05 | 8.54E-04 |
| 17468298 | Exoc6b        | 1.41 | 2.30E-05 | 1.01E-03 |
| 17487489 | Pvr           | 1.41 | 1.05E-04 | 3.04E-03 |
| 17356490 | Rela          | 1.40 | 1.73E-05 | 8.07E-04 |

|          |              |      |          |          |
|----------|--------------|------|----------|----------|
| 17281148 | Baz1a        | 1.40 | 1.19E-04 | 3.32E-03 |
| 17377092 | Sec23b       | 1.40 | 9.41E-05 | 2.80E-03 |
| 17439622 | Agpat9       | 1.40 | 5.10E-05 | 1.81E-03 |
| 17495549 | Itpril2      | 1.40 | 3.21E-04 | 7.04E-03 |
| 17452552 | Rhof         | 1.40 | 4.09E-04 | 8.41E-03 |
| 17418540 | Stk40        | 1.40 | 2.32E-04 | 5.50E-03 |
| 17353699 | Hbegf        | 1.40 | 2.91E-05 | 1.20E-03 |
| 17356662 | Batf2        | 1.39 | 4.58E-04 | 9.22E-03 |
| 17367192 | Arl5b        | 1.39 | 5.70E-05 | 1.95E-03 |
| 17282868 | Sptlc2       | 1.39 | 3.31E-05 | 1.32E-03 |
| 17548321 | LOC100862248 | 1.39 | 1.14E-04 | 3.24E-03 |
| 17279919 | Rhob         | 1.39 | 7.81E-05 | 2.47E-03 |
| 17466060 | Parp12       | 1.39 | 9.20E-05 | 2.76E-03 |
| 17480018 | Ctsc         | 1.39 | 2.64E-05 | 1.12E-03 |
| 17525240 | St14         | 1.39 | 8.83E-06 | 4.80E-04 |
| 17466783 | Skap2        | 1.39 | 3.75E-04 | 7.90E-03 |
| 17424656 | Tpm2         | 1.38 | 4.31E-04 | 8.79E-03 |
| 17511453 | N4bp1        | 1.38 | 1.89E-04 | 4.76E-03 |
| 17321761 | Smagp        | 1.38 | 1.84E-05 | 8.54E-04 |
| 17539210 | Sh3kbp1      | 1.38 | 1.60E-04 | 4.22E-03 |
| 17317046 | Tnfrsf11b    | 1.38 | 3.90E-05 | 1.49E-03 |
| 17414836 | Tlr4         | 1.38 | 1.97E-04 | 4.88E-03 |
| 17442177 | Orai1        | 1.38 | 2.28E-04 | 5.45E-03 |
| 17392333 | Rrbp1        | 1.38 | 4.04E-05 | 1.53E-03 |
| 17377753 | H13          | 1.38 | 2.67E-05 | 1.12E-03 |
| 17295136 | Iqgap2       | 1.37 | 8.32E-05 | 2.56E-03 |
| 17255232 | Lrrc59       | 1.37 | 1.39E-05 | 6.87E-04 |
| 17410410 | Sgms2        | 1.37 | 2.56E-05 | 1.10E-03 |
| 17274751 | Sh3yl1       | 1.37 | 3.84E-04 | 8.02E-03 |
| 17325093 | Muc13        | 1.36 | 1.63E-05 | 7.77E-04 |
| 17314460 | Irak4        | 1.36 | 3.70E-04 | 7.82E-03 |
| 17346840 | Rab12        | 1.36 | 2.01E-04 | 4.96E-03 |
| 17385684 | Rbms1        | 1.36 | 2.60E-05 | 1.11E-03 |
| 17529322 | Ibtk         | 1.36 | 7.47E-05 | 2.41E-03 |
| 17471062 | Tapbpl       | 1.36 | 1.92E-04 | 4.80E-03 |
| 17508691 | Rbpms        | 1.36 | 3.26E-04 | 7.12E-03 |
| 17502378 | Tpm4         | 1.36 | 3.86E-05 | 1.48E-03 |
| 17314061 | Trabd        | 1.36 | 8.27E-05 | 2.55E-03 |
| 17338946 | Crb3         | 1.36 | 4.90E-04 | 9.74E-03 |
| 17248561 | Atp10b       | 1.36 | 7.79E-05 | 2.47E-03 |
| 17385654 | Itgb6        | 1.36 | 1.87E-04 | 4.73E-03 |
| 17245302 | Rap1b        | 1.35 | 3.14E-05 | 1.27E-03 |
| 17513713 | Fam38a       | 1.35 | 1.15E-04 | 3.25E-03 |
| 17239090 | Tab2         | 1.35 | 2.51E-04 | 5.78E-03 |
| 17327524 | Igsf5        | 1.35 | 1.33E-04 | 3.63E-03 |



|          |         |      |          |          |
|----------|---------|------|----------|----------|
| 17231859 | Ifngr1  | 1.34 | 3.79E-05 | 1.47E-03 |
| 17432341 | Efhd2   | 1.34 | 5.50E-05 | 1.91E-03 |
| 17428142 | Osbpl9  | 1.34 | 8.33E-05 | 2.56E-03 |
| 17222825 | Obfc2a  | 1.34 | 7.61E-05 | 2.43E-03 |
| 17224661 | Epha4   | 1.34 | 1.65E-04 | 4.31E-03 |
| 17271118 | Pitpnc1 | 1.34 | 2.50E-04 | 5.77E-03 |
| 17318013 | Lynx1   | 1.33 | 4.43E-05 | 1.61E-03 |
| 17453496 | Cldn4   | 1.33 | 3.33E-05 | 1.33E-03 |
| 17299288 | Samd4   | 1.33 | 1.81E-04 | 4.61E-03 |
| 17513641 | Slc7a5  | 1.33 | 4.35E-04 | 8.86E-03 |
| 17342101 | Hn1l    | 1.33 | 1.60E-04 | 4.21E-03 |
| 17292722 | Cltb    | 1.33 | 7.83E-05 | 2.48E-03 |
| 17439029 | Areg    | 1.33 | 4.01E-05 | 1.52E-03 |
| 17492598 | Furin   | 1.33 | 4.29E-04 | 8.76E-03 |
| 17377597 | Fkbp1a  | 1.33 | 3.70E-04 | 7.82E-03 |
| 17445786 | Ptpn12  | 1.32 | 1.46E-04 | 3.91E-03 |
| 17351414 | Pmaip1  | 1.32 | 4.74E-04 | 9.45E-03 |
| 17227278 | Rnpep   | 1.32 | 5.59E-05 | 1.93E-03 |
| 17385967 | Galnt3  | 1.32 | 6.56E-05 | 2.19E-03 |
| 17483925 | Dmbt1   | 1.32 | 4.67E-04 | 9.35E-03 |
| 17495262 | Rras2   | 1.32 | 7.72E-05 | 2.46E-03 |
| 17517105 | Ii18    | 1.32 | 1.55E-04 | 4.10E-03 |
| 17285000 | Klf6    | 1.32 | 3.02E-04 | 6.69E-03 |
| 17456176 | Met     | 1.32 | 2.87E-04 | 6.50E-03 |
| 17297305 | Ngly1   | 1.31 | 1.14E-04 | 3.24E-03 |
| 17361741 | Ehbp1l1 | 1.31 | 3.59E-04 | 7.64E-03 |
| 17398903 | Nes     | 1.31 | 6.79E-05 | 2.23E-03 |
| 17335297 | Ppard   | 1.31 | 2.43E-04 | 5.67E-03 |
| 17358119 | Zfand5  | 1.31 | 9.33E-05 | 2.79E-03 |
| 17298775 | Anxa8   | 1.31 | 2.33E-04 | 5.52E-03 |
| 17274249 | Pdia6   | 1.31 | 4.93E-05 | 1.76E-03 |
| 17530000 | Pik3cb  | 1.31 | 3.46E-04 | 7.48E-03 |
| 17295125 | F2rl1   | 1.31 | 8.88E-05 | 2.69E-03 |
| 17286231 | Sox4    | 1.30 | 2.24E-04 | 5.38E-03 |
| 17496345 | Nupr1   | 1.30 | 2.05E-04 | 5.02E-03 |
| 17268137 | Itga3   | 1.30 | 2.06E-04 | 5.04E-03 |
| 17312280 | Gsdmd   | 1.30 | 1.05E-04 | 3.04E-03 |
| 17526206 | C2cd2l  | 1.30 | 2.43E-04 | 5.67E-03 |
| 17325619 | Tmem39a | 1.30 | 2.91E-04 | 6.57E-03 |
| 17464128 | Golt1b  | 1.30 | 1.80E-04 | 4.60E-03 |
| 17405737 | Lxn     | 1.30 | 2.21E-04 | 5.32E-03 |
| 17475597 | Sertad1 | 1.30 | 3.91E-04 | 8.10E-03 |
| 17363374 | Ostf1   | 1.30 | 3.62E-04 | 7.70E-03 |
| 17438062 | Nipal1  | 1.30 | 1.66E-04 | 4.32E-03 |
| 17337467 | Trim31  | 1.30 | 3.50E-04 | 7.51E-03 |

|          |               |      |          |          |
|----------|---------------|------|----------|----------|
| 17327995 | Carhsp1       | 1.29 | 4.52E-04 | 9.14E-03 |
| 17381043 | Tpd52l2       | 1.29 | 2.88E-04 | 6.50E-03 |
| 17469887 | 2510049J12Rik | 1.29 | 1.24E-04 | 3.42E-03 |
| 17274415 | Asap2         | 1.29 | 4.93E-04 | 9.78E-03 |
| 17341589 | Paqr4         | 1.28 | 1.19E-04 | 3.32E-03 |
| 17530322 | Uba5          | 1.28 | 3.90E-04 | 8.10E-03 |
| 17418934 | Tmem54        | 1.28 | 1.81E-04 | 4.61E-03 |
| 17508300 | Adam9         | 1.28 | 1.23E-04 | 3.42E-03 |
| 17528202 | Rab11a        | 1.28 | 3.47E-04 | 7.48E-03 |
| 17363407 | Anxa1         | 1.28 | 1.14E-04 | 3.24E-03 |
| 17290242 | Net1          | 1.28 | 1.52E-04 | 4.04E-03 |
| 17510422 | B3gnt3        | 1.28 | 2.41E-04 | 5.65E-03 |
| 17410376 | Ostc          | 1.28 | 2.02E-04 | 4.97E-03 |
| 17442096 | Arpc3         | 1.28 | 2.13E-04 | 5.18E-03 |
| 17268493 | Npepps        | 1.27 | 2.13E-04 | 5.18E-03 |
| 17488458 | Zfp36         | 1.26 | 4.25E-04 | 8.71E-03 |
| 17531987 | Tgfbr2        | 1.26 | 3.94E-04 | 8.15E-03 |
| 17336896 | Clic1         | 1.26 | 3.87E-04 | 8.05E-03 |
| 17350356 | Eif1a         | 1.26 | 2.32E-04 | 5.50E-03 |
| 17233736 | Sar1a         | 1.26 | 4.88E-04 | 9.70E-03 |
| 17335842 | Pde9a         | 1.25 | 3.76E-04 | 7.91E-03 |
| 17225760 | Stk25         | 1.25 | 3.65E-04 | 7.72E-03 |
| 17336788 | Slc44a4       | 1.25 | 1.99E-04 | 4.92E-03 |
| 17429613 | Cap1          | 1.24 | 2.57E-04 | 5.89E-03 |
| 17406760 | Sema4a        | 1.24 | 3.62E-04 | 7.70E-03 |
| 17384632 | Strbp         | 0.82 | 4.56E-04 | 9.20E-03 |
| 17282563 | Npc2          | 0.80 | 4.95E-04 | 9.80E-03 |
| 17273292 | Dcxr          | 0.79 | 2.31E-04 | 5.50E-03 |
| 17404180 | Car1          | 0.79 | 2.48E-04 | 5.74E-03 |
| 17506938 | Irf2bp2       | 0.78 | 2.95E-04 | 6.59E-03 |
| 17311315 | Ttc35         | 0.78 | 4.99E-04 | 9.85E-03 |
| 17361073 | Gstp1         | 0.78 | 1.87E-04 | 4.74E-03 |
| 17223138 | Pgap1         | 0.78 | 3.34E-04 | 7.26E-03 |
| 17235268 | Ndufs7        | 0.78 | 5.03E-04 | 9.90E-03 |
| 17250734 | 2410006H16Rik | 0.78 | 3.05E-04 | 6.74E-03 |
| 17469259 | Suclg2        | 0.78 | 2.34E-04 | 5.54E-03 |
| 17501050 | Irf2          | 0.78 | 3.48E-04 | 7.49E-03 |
| 17429057 | Ptpnf         | 0.77 | 3.64E-04 | 7.72E-03 |
| 17329723 | Acap2         | 0.77 | 1.72E-04 | 4.46E-03 |
| 17261865 | Ccng1         | 0.77 | 1.02E-04 | 2.98E-03 |
| 17475975 | Ech1          | 0.77 | 2.29E-04 | 5.46E-03 |
| 17406091 | Etfdh         | 0.77 | 3.35E-04 | 7.26E-03 |
| 17233799 | Slc25a16      | 0.77 | 3.78E-04 | 7.93E-03 |
| 17300429 | Dhrs4         | 0.77 | 2.72E-04 | 6.19E-03 |
| 17335493 | BC004004      | 0.77 | 2.14E-04 | 5.19E-03 |

|          |               |      |          |          |
|----------|---------------|------|----------|----------|
| 17391608 | Idh3b         | 0.77 | 2.93E-04 | 6.57E-03 |
| 17415863 | Cachd1        | 0.77 | 3.50E-04 | 7.50E-03 |
| 17265129 | Acadvl        | 0.77 | 1.80E-04 | 4.60E-03 |
| 17364932 | Got1          | 0.76 | 2.40E-04 | 5.62E-03 |
| 17225775 | Thap4         | 0.76 | 1.02E-04 | 2.99E-03 |
| 17339991 | Eml4          | 0.76 | 8.96E-05 | 2.70E-03 |
| 17315187 | 9430023L20Rik | 0.76 | 5.19E-05 | 1.83E-03 |
| 17390823 | Slc30a4       | 0.76 | 1.97E-04 | 4.88E-03 |
| 17463169 | Scnn1a        | 0.76 | 8.25E-05 | 2.55E-03 |
| 17295308 | Rgref         | 0.76 | 3.02E-04 | 6.69E-03 |
| 17360331 | Mxi1          | 0.76 | 2.33E-04 | 5.52E-03 |
| 17421828 | Clstn1        | 0.75 | 7.96E-05 | 2.49E-03 |
| 17526813 | Pts           | 0.75 | 2.16E-04 | 5.24E-03 |
| 17360084 | As3mt         | 0.75 | 1.74E-04 | 4.50E-03 |
| 17548296 | LOC100503320  | 0.75 | 2.48E-04 | 5.74E-03 |
| 17281908 | Tmem30b       | 0.75 | 1.19E-04 | 3.32E-03 |
| 17255691 | Prr15l        | 0.75 | 4.66E-05 | 1.67E-03 |
| 17423544 | Wwp1          | 0.75 | 4.37E-04 | 8.88E-03 |
| 17514424 | Casp1         | 0.75 | 1.91E-04 | 4.79E-03 |
| 17441949 | Aldh2         | 0.75 | 8.38E-05 | 2.57E-03 |
| 17504293 | Mmp15         | 0.75 | 8.64E-05 | 2.63E-03 |
| 17481960 | Arntl         | 0.75 | 1.17E-04 | 3.29E-03 |
| 17210984 | Pcmt1         | 0.75 | 1.40E-04 | 3.77E-03 |
| 17347751 | Lrpprc        | 0.75 | 1.76E-04 | 4.52E-03 |
| 17393684 | Rbl1          | 0.75 | 4.62E-04 | 9.27E-03 |
| 17252497 | Atp2a3        | 0.74 | 4.88E-04 | 9.70E-03 |
| 17343164 | Tff3          | 0.74 | 7.61E-05 | 2.43E-03 |
| 17336077 | Zfp955b       | 0.74 | 4.74E-04 | 9.45E-03 |
| 17370924 | Galnt5        | 0.74 | 1.93E-04 | 4.82E-03 |
| 17487001 | Hif3a         | 0.74 | 4.83E-04 | 9.61E-03 |
| 17302766 | Rap2a         | 0.74 | 3.54E-04 | 7.56E-03 |
| 17409736 | Slc35a3       | 0.74 | 3.86E-04 | 8.04E-03 |
| 17469656 | Srgap3        | 0.74 | 2.41E-04 | 5.65E-03 |
| 17393592 | Ndr3          | 0.74 | 9.87E-05 | 2.91E-03 |
| 17397475 | Mgst2         | 0.74 | 7.91E-05 | 2.49E-03 |
| 17443286 | Por           | 0.74 | 7.58E-05 | 2.43E-03 |
| 17470301 | Adipor2       | 0.74 | 1.19E-04 | 3.32E-03 |
| 17276743 | Plekhh1       | 0.74 | 1.81E-04 | 4.61E-03 |
| 17328277 | Pla2g10       | 0.74 | 4.37E-05 | 1.60E-03 |
| 17509976 | Slc25a4       | 0.74 | 3.14E-04 | 6.91E-03 |
| 17509462 | Galnt7        | 0.74 | 9.33E-05 | 2.79E-03 |
| 17302305 | Tdrd3         | 0.74 | 4.09E-05 | 1.54E-03 |
| 17242046 | Dip2a         | 0.73 | 5.80E-05 | 1.97E-03 |
| 17405142 | Setd7         | 0.73 | 2.93E-04 | 6.57E-03 |
| 17218149 | Ivns1abp      | 0.73 | 9.61E-05 | 2.85E-03 |

|          |               |      |          |          |
|----------|---------------|------|----------|----------|
| 17498786 | Lrrc8e        | 0.73 | 3.96E-05 | 1.51E-03 |
| 17525263 | Aplp2         | 0.73 | 8.40E-05 | 2.57E-03 |
| 17426497 | Megf9         | 0.73 | 3.92E-05 | 1.50E-03 |
| 17544424 | Nox1          | 0.73 | 1.46E-04 | 3.91E-03 |
| 17213548 | Nrp2          | 0.73 | 1.15E-04 | 3.26E-03 |
| 17215576 | Agap1         | 0.73 | 2.86E-04 | 6.48E-03 |
| 17384021 | Stxbp1        | 0.73 | 2.50E-04 | 5.77E-03 |
| 17411323 | Acadm         | 0.73 | 4.35E-05 | 1.60E-03 |
| 17499396 | Fbxo25        | 0.73 | 4.94E-04 | 9.79E-03 |
| 17313087 | Mgat3         | 0.72 | 2.68E-05 | 1.13E-03 |
| 17356041 | Acy3          | 0.72 | 1.62E-04 | 4.24E-03 |
| 17320666 | Slc2a13       | 0.72 | 3.18E-04 | 7.01E-03 |
| 17378359 | Accs2         | 0.72 | 2.36E-04 | 5.55E-03 |
| 17514732 | Sesn3         | 0.72 | 4.42E-04 | 8.97E-03 |
| 17505718 | Pdpr          | 0.72 | 4.66E-04 | 9.34E-03 |
| 17484014 | Acadsb        | 0.72 | 6.05E-05 | 2.04E-03 |
| 17542149 | Ids           | 0.72 | 2.36E-04 | 5.55E-03 |
| 17527735 | Neo1          | 0.72 | 2.01E-04 | 4.96E-03 |
| 17331669 | App           | 0.72 | 1.27E-05 | 6.42E-04 |
| 17411547 | Chchd7        | 0.72 | 3.81E-04 | 7.96E-03 |
| 17479875 | Stard5        | 0.72 | 1.97E-04 | 4.88E-03 |
| 17355790 | Tshz1         | 0.72 | 4.25E-04 | 8.71E-03 |
| 17532418 | Ano10         | 0.72 | 2.49E-04 | 5.76E-03 |
| 17517448 | Agphd1        | 0.72 | 1.36E-04 | 3.67E-03 |
| 17233039 | Rtn4ip1       | 0.71 | 3.81E-04 | 7.96E-03 |
| 17527123 | Acat1         | 0.71 | 6.88E-05 | 2.25E-03 |
| 17426981 | Plin2         | 0.71 | 2.75E-04 | 6.25E-03 |
| 17274813 | Slc26a3       | 0.71 | 3.45E-04 | 7.46E-03 |
| 17266107 | Abr           | 0.71 | 3.33E-04 | 7.26E-03 |
| 17319150 | Baiap2l2      | 0.71 | 3.47E-04 | 7.48E-03 |
| 17233394 | Smpdl3a       | 0.71 | 5.31E-05 | 1.86E-03 |
| 17345004 | LOC100862363  | 0.71 | 1.63E-04 | 4.26E-03 |
| 17234066 | Ank3          | 0.71 | 9.36E-05 | 2.79E-03 |
| 17524156 | 4931406C07Rik | 0.71 | 1.68E-05 | 7.95E-04 |
| 17400403 | Golph3l       | 0.71 | 3.77E-05 | 1.47E-03 |
| 17310912 | Laptm4b       | 0.71 | 2.13E-05 | 9.57E-04 |
| 17231717 | Fuca2         | 0.71 | 2.49E-05 | 1.07E-03 |
| 17396162 | Car2          | 0.71 | 1.99E-05 | 9.11E-04 |
| 17400759 | Acp6          | 0.71 | 2.39E-05 | 1.04E-03 |
| 17343735 | H2-Ke6        | 0.71 | 2.37E-04 | 5.56E-03 |
| 17530159 | Ppp2r3a       | 0.71 | 4.03E-04 | 8.31E-03 |
| 17442149 | P2rx4         | 0.71 | 8.78E-05 | 2.66E-03 |
| 17284222 | Ahnak2        | 0.70 | 3.06E-04 | 6.77E-03 |
| 17434614 | 4930420K17Rik | 0.70 | 4.48E-04 | 9.07E-03 |
| 17321790 | Galnt6        | 0.70 | 2.26E-04 | 5.41E-03 |

|          |               |      |          |          |
|----------|---------------|------|----------|----------|
| 17467154 | Ppm1k         | 0.70 | 1.48E-04 | 3.94E-03 |
| 17397957 | P2ry1         | 0.70 | 2.05E-05 | 9.27E-04 |
| 17435584 | Insig1        | 0.70 | 4.35E-05 | 1.60E-03 |
| 17331059 | Gpr128        | 0.70 | 8.74E-06 | 4.77E-04 |
| 17475026 | Ethe1         | 0.70 | 1.50E-05 | 7.36E-04 |
| 17212286 | Slc9a2        | 0.70 | 5.06E-05 | 1.79E-03 |
| 17243576 | Appl2         | 0.70 | 2.65E-05 | 1.12E-03 |
| 17443401 | Rasa4         | 0.70 | 9.56E-05 | 2.84E-03 |
| 17514799 | 2200002K05Rik | 0.70 | 7.73E-05 | 2.46E-03 |
| 17532045 | Plcd1         | 0.70 | 4.26E-04 | 8.71E-03 |
| 17334253 | Eci1          | 0.70 | 2.90E-05 | 1.20E-03 |
| 17251994 | Slc16a11      | 0.70 | 8.12E-05 | 2.53E-03 |
| 17279365 | Siva1         | 0.70 | 7.98E-05 | 2.49E-03 |
| 17480216 | Prpc          | 0.70 | 3.61E-05 | 1.43E-03 |
| 17430216 | Gjb3          | 0.69 | 1.27E-04 | 3.49E-03 |
| 17534909 | Ddx26b        | 0.69 | 4.74E-04 | 9.45E-03 |
| 17475734 | Fcgbp         | 0.69 | 8.14E-05 | 2.53E-03 |
| 17411751 | Trp53inp1     | 0.69 | 2.25E-05 | 9.93E-04 |
| 17312032 | Ndrp1         | 0.69 | 3.58E-05 | 1.42E-03 |
| 17459676 | Retsat        | 0.69 | 5.31E-05 | 1.86E-03 |
| 17309161 | Fbxl3         | 0.69 | 2.84E-06 | 1.98E-04 |
| 17477897 | Bcat2         | 0.69 | 4.42E-06 | 2.77E-04 |
| 17219356 | Tstd1         | 0.69 | 4.69E-06 | 2.91E-04 |
| 17223490 | Tmem237       | 0.69 | 3.86E-04 | 8.04E-03 |
| 17228375 | Xpr1          | 0.69 | 1.51E-05 | 7.37E-04 |
| 17520233 | Ctsh          | 0.69 | 4.20E-05 | 1.56E-03 |
| 17402283 | Gclm          | 0.69 | 1.69E-05 | 7.96E-04 |
| 17297227 | Slc4a7        | 0.69 | 1.04E-04 | 3.01E-03 |
| 17219231 | Nr1i3         | 0.68 | 1.42E-05 | 7.01E-04 |
| 17268227 | Abi3          | 0.68 | 3.86E-05 | 1.48E-03 |
| 17339801 | Crim1         | 0.68 | 3.21E-04 | 7.04E-03 |
| 17232912 | Sesn1         | 0.68 | 2.50E-04 | 5.77E-03 |
| 17440054 | A830010M20Rik | 0.68 | 1.37E-04 | 3.70E-03 |
| 17277195 | Ptgr2         | 0.68 | 2.32E-04 | 5.50E-03 |
| 17216960 | Pigr          | 0.68 | 3.27E-05 | 1.31E-03 |
| 17381864 | Trdmt1        | 0.68 | 3.52E-04 | 7.52E-03 |
| 17445860 | Napepld       | 0.68 | 1.10E-04 | 3.15E-03 |
| 17336921 | Ly6g6c        | 0.68 | 2.93E-04 | 6.57E-03 |
| 17477979 | Dbp           | 0.68 | 3.26E-04 | 7.12E-03 |
| 17297576 | Adk           | 0.68 | 1.72E-05 | 8.07E-04 |
| 17359769 | Sema4g        | 0.67 | 1.99E-05 | 9.11E-04 |
| 17309802 | Oxct1         | 0.67 | 6.18E-06 | 3.60E-04 |
| 17238605 | Itga7         | 0.67 | 3.79E-05 | 1.47E-03 |
| 17338472 | Mocs1         | 0.67 | 2.47E-04 | 5.74E-03 |
| 17339313 | Epb4.1l3      | 0.67 | 1.11E-04 | 3.17E-03 |

|          |               |      |          |          |
|----------|---------------|------|----------|----------|
| 17367036 | Pter          | 0.67 | 3.17E-05 | 1.28E-03 |
| 17420777 | Aldh4a1       | 0.67 | 9.13E-05 | 2.75E-03 |
| 17505455 | Phlpp2        | 0.67 | 6.58E-05 | 2.19E-03 |
| 17501787 | Tm6sf2        | 0.67 | 4.00E-04 | 8.26E-03 |
| 17498847 | Lass4         | 0.67 | 4.63E-05 | 1.67E-03 |
| 17252058 | Tm4sf5        | 0.66 | 7.90E-05 | 2.49E-03 |
| 17498467 | Ano1          | 0.66 | 3.84E-05 | 1.48E-03 |
| 17490889 | 0610005C13Rik | 0.66 | 3.52E-04 | 7.52E-03 |
| 17291355 | Acot13        | 0.66 | 5.91E-05 | 2.01E-03 |
| 17480788 | Fchsd2        | 0.66 | 1.30E-04 | 3.57E-03 |
| 17355915 | Cpt1a         | 0.66 | 1.95E-05 | 8.98E-04 |
| 17495586 | Gde1          | 0.66 | 4.08E-05 | 1.54E-03 |
| 17455882 | Ppp1r9a       | 0.66 | 1.47E-04 | 3.93E-03 |
| 17527054 | Atm           | 0.66 | 2.43E-04 | 5.67E-03 |
| 17469754 | Cidec         | 0.66 | 9.85E-05 | 2.91E-03 |
| 17229007 | Fmo4          | 0.66 | 4.09E-04 | 8.41E-03 |
| 17517349 | Slc35f2       | 0.66 | 4.57E-04 | 9.21E-03 |
| 17438423 | Paics         | 0.66 | 1.07E-04 | 3.08E-03 |
| 17493980 | Lrrc51        | 0.66 | 4.53E-05 | 1.64E-03 |
| 17243392 | Gna11         | 0.66 | 4.87E-06 | 2.98E-04 |
| 17222777 | Slc40a1       | 0.66 | 6.70E-05 | 2.22E-03 |
| 17363799 | 5033414D02Rik | 0.66 | 4.58E-05 | 1.65E-03 |
| 17325637 | B4galt4       | 0.66 | 6.40E-05 | 2.14E-03 |
| 17407764 | Prune         | 0.65 | 2.53E-05 | 1.09E-03 |
| 17467608 | Rmnd5a        | 0.65 | 2.00E-05 | 9.12E-04 |
| 17527421 | Tspan3        | 0.65 | 1.46E-05 | 7.19E-04 |
| 17302889 | Pcca          | 0.65 | 6.13E-05 | 2.07E-03 |
| 17449033 | Ppat          | 0.65 | 2.05E-04 | 5.02E-03 |
| 17309688 | A2ld1         | 0.65 | 5.37E-05 | 1.87E-03 |
| 17388803 | Cat           | 0.65 | 3.10E-06 | 2.13E-04 |
| 17323838 | Klhl24        | 0.65 | 7.36E-05 | 2.39E-03 |
| 17493461 | Aqp11         | 0.64 | 7.75E-06 | 4.31E-04 |
| 17310882 | Pgcp          | 0.64 | 3.00E-04 | 6.66E-03 |
| 17286487 | Bphl          | 0.64 | 5.71E-05 | 1.95E-03 |
| 17451171 | Hscb          | 0.64 | 3.98E-05 | 1.51E-03 |
| 17420064 | Tcea3         | 0.64 | 4.45E-04 | 9.00E-03 |
| 17284037 | Brp44l        | 0.64 | 4.99E-04 | 9.85E-03 |
| 17240880 | Man1a         | 0.64 | 1.04E-05 | 5.47E-04 |
| 17480515 | Mtap6         | 0.64 | 5.54E-05 | 1.92E-03 |
| 17410390 | Hadh          | 0.64 | 1.83E-06 | 1.39E-04 |
| 17249702 | Fnip1         | 0.64 | 2.86E-04 | 6.48E-03 |
| 17265748 | Aspa          | 0.64 | 1.31E-04 | 3.58E-03 |
| 17363328 | Pcsk5         | 0.63 | 3.71E-05 | 1.45E-03 |
| 17350090 | Sh3rf2        | 0.63 | 7.42E-06 | 4.19E-04 |
| 17366511 | Phyh          | 0.63 | 1.70E-06 | 1.31E-04 |

|          |               |      |          |          |
|----------|---------------|------|----------|----------|
| 17326964 | Hunk          | 0.63 | 2.87E-04 | 6.50E-03 |
| 17295503 | Mccc2         | 0.63 | 3.55E-06 | 2.34E-04 |
| 17218349 | Glul          | 0.63 | 8.99E-07 | 7.92E-05 |
| 17350364 | LOC100861902  | 0.63 | 1.56E-05 | 7.52E-04 |
| 17319554 | Pmm1          | 0.63 | 8.54E-05 | 2.61E-03 |
| 17343505 | Cyp4f13       | 0.63 | 1.99E-04 | 4.92E-03 |
| 17464400 | Rep15         | 0.63 | 1.16E-04 | 3.27E-03 |
| 17443486 | Cldn15        | 0.63 | 8.67E-05 | 2.64E-03 |
| 17489801 | Nudt19        | 0.63 | 4.22E-05 | 1.56E-03 |
| 17433328 | Per3          | 0.62 | 1.87E-05 | 8.62E-04 |
| 17397129 | Fgf2          | 0.62 | 2.95E-06 | 2.06E-04 |
| 17502816 | Inpp4b        | 0.62 | 6.12E-06 | 3.59E-04 |
| 17533474 | Maoa          | 0.62 | 2.43E-06 | 1.74E-04 |
| 17291241 | Slc17a4       | 0.62 | 1.15E-04 | 3.25E-03 |
| 17259810 | Inpp5j        | 0.62 | 3.71E-06 | 2.41E-04 |
| 17410939 | Clca3         | 0.62 | 3.57E-06 | 2.34E-04 |
| 17320907 | Slc38a1       | 0.62 | 1.77E-06 | 1.35E-04 |
| 17388389 | Cry2          | 0.62 | 2.58E-04 | 5.91E-03 |
| 17423701 | Fut9          | 0.62 | 1.28E-06 | 1.02E-04 |
| 17288269 | Gm10767       | 0.62 | 1.89E-04 | 4.75E-03 |
| 17435934 | Khk           | 0.62 | 2.97E-04 | 6.62E-03 |
| 17235320 | Reep6         | 0.62 | 3.44E-06 | 2.31E-04 |
| 17259907 | Tcn2          | 0.61 | 1.12E-06 | 9.11E-05 |
| 17516960 | Cadm1         | 0.61 | 2.89E-05 | 1.20E-03 |
| 17295588 | Naip5         | 0.61 | 8.25E-05 | 2.55E-03 |
| 17436407 | Slc5a1        | 0.61 | 1.10E-04 | 3.17E-03 |
| 17530141 | Pccb          | 0.61 | 2.23E-05 | 9.90E-04 |
| 17409343 | 5330417C22Rik | 0.61 | 2.77E-05 | 1.16E-03 |
| 17255466 | Gngt2         | 0.61 | 2.19E-04 | 5.30E-03 |
| 17303412 | Acox2         | 0.61 | 5.72E-06 | 3.39E-04 |
| 17359636 | Abcc2         | 0.61 | 3.77E-05 | 1.47E-03 |
| 17220794 | D730003I15Rik | 0.61 | 3.95E-04 | 8.18E-03 |
| 17310837 | Sema5a        | 0.60 | 4.14E-06 | 2.64E-04 |
| 17311533 | Deptor        | 0.60 | 3.98E-06 | 2.55E-04 |
| 17427401 | Cyp2j9        | 0.60 | 3.39E-04 | 7.35E-03 |
| 17214368 | Cyp27a1       | 0.60 | 4.43E-05 | 1.61E-03 |
| 17307134 | Cryl1         | 0.59 | 3.89E-06 | 2.51E-04 |
| 17508938 | Fgl1          | 0.59 | 2.20E-04 | 5.31E-03 |
| 17258220 | Slc16a5       | 0.59 | 4.91E-05 | 1.75E-03 |
| 17246113 | Slc39a5       | 0.59 | 3.80E-04 | 7.96E-03 |
| 17339554 | Lbh           | 0.59 | 1.51E-07 | 1.98E-05 |
| 17351811 | Acaa2         | 0.59 | 4.27E-07 | 4.44E-05 |
| 17448308 | Ugdh          | 0.59 | 2.58E-07 | 3.05E-05 |
| 17237208 | Csrp2         | 0.59 | 1.11E-07 | 1.52E-05 |
| 17243183 | Creb3l3       | 0.59 | 2.96E-04 | 6.59E-03 |

|          |               |      |          |          |
|----------|---------------|------|----------|----------|
| 17544691 | Bex2          | 0.59 | 1.95E-04 | 4.86E-03 |
| 17413674 | Aldh1b1       | 0.59 | 3.30E-06 | 2.24E-04 |
| 17318983 | Tst           | 0.59 | 7.91E-07 | 7.36E-05 |
| 17449313 | Ugt2b34       | 0.59 | 2.90E-07 | 3.36E-05 |
| 17471222 | Ccnd2         | 0.58 | 3.74E-07 | 4.00E-05 |
| 17240303 | G630090E17Rik | 0.58 | 3.21E-04 | 7.04E-03 |
| 17429954 | 1700029G01Rik | 0.58 | 5.24E-06 | 3.18E-04 |
| 17232135 | 1110021L09Rik | 0.58 | 1.21E-06 | 9.72E-05 |
| 17339910 | Galm          | 0.58 | 1.66E-05 | 7.89E-04 |
| 17366670 | Itih5         | 0.58 | 4.72E-07 | 4.70E-05 |
| 17253648 | Slc46a1       | 0.58 | 3.49E-06 | 2.32E-04 |
| 17310637 | Fam134b       | 0.58 | 6.78E-06 | 3.91E-04 |
| 17280310 | Id2           | 0.58 | 1.02E-06 | 8.65E-05 |
| 17442780 | Glt1d1        | 0.58 | 7.57E-05 | 2.43E-03 |
| 17306147 | Ndrp2         | 0.58 | 3.17E-05 | 1.28E-03 |
| 17329298 | Etv5          | 0.58 | 3.64E-05 | 1.44E-03 |
| 17520905 | Slco2a1       | 0.58 | 1.02E-05 | 5.45E-04 |
| 17251441 | Slc25a35      | 0.58 | 5.62E-05 | 1.94E-03 |
| 17250055 | 1810065E05Rik | 0.58 | 6.15E-06 | 3.60E-04 |
| 17449989 | Rasgef1b      | 0.57 | 7.63E-06 | 4.28E-04 |
| 17329220 | Ehhadh        | 0.57 | 6.46E-05 | 2.16E-03 |
| 17277134 | Acot2         | 0.57 | 7.18E-06 | 4.07E-04 |
| 17310673 | Ank           | 0.57 | 2.04E-06 | 1.51E-04 |
| 17362717 | Dak           | 0.57 | 2.08E-05 | 9.38E-04 |
| 17484670 | Nlrp6         | 0.57 | 4.56E-05 | 1.65E-03 |
| 17310816 | Cdbl          | 0.57 | 3.78E-06 | 2.45E-04 |
| 17477391 | Klk1          | 0.57 | 1.03E-06 | 8.67E-05 |
| 17337844 | Enpp5         | 0.56 | 1.58E-07 | 2.06E-05 |
| 17317284 | Anxa13        | 0.56 | 8.48E-06 | 4.64E-04 |
| 17459696 | Gm15401       | 0.56 | 8.47E-06 | 4.64E-04 |
| 17327255 | Cbr1          | 0.56 | 1.66E-07 | 2.14E-05 |
| 17495958 | Ern2          | 0.56 | 1.12E-06 | 9.14E-05 |
| 17528934 | Tinag         | 0.56 | 3.43E-07 | 3.81E-05 |
| 17449725 | Cxcl11        | 0.56 | 1.37E-05 | 6.86E-04 |
| 17437459 | Slc34a2       | 0.56 | 7.90E-05 | 2.49E-03 |
| 17302161 | 1300010F03Rik | 0.56 | 8.21E-07 | 7.47E-05 |
| 17282498 | Entpd5        | 0.56 | 1.71E-07 | 2.16E-05 |
| 17411420 | Cth           | 0.56 | 1.67E-05 | 7.91E-04 |
| 17272468 | St6galnac2    | 0.56 | 4.10E-07 | 4.33E-05 |
| 17466581 | Zfp467        | 0.55 | 2.92E-04 | 6.57E-03 |
| 17292071 | Nedd9         | 0.55 | 1.87E-06 | 1.40E-04 |
| 17363559 | Fam189a2      | 0.55 | 1.72E-04 | 4.46E-03 |
| 17433672 | 2810405K02Rik | 0.55 | 2.30E-07 | 2.78E-05 |
| 17467209 | Fam13a        | 0.55 | 1.24E-05 | 6.30E-04 |
| 17489214 | Upk1a         | 0.55 | 1.71E-04 | 4.44E-03 |



|          |               |      |          |          |
|----------|---------------|------|----------|----------|
| 17506030 | Hsd17b2       | 0.55 | 6.02E-08 | 1.01E-05 |
| 17268010 | Acsf2         | 0.55 | 1.10E-06 | 9.08E-05 |
| 17464210 | Lrmp          | 0.55 | 1.03E-04 | 3.00E-03 |
| 17284963 | Marcks1-ps4   | 0.55 | 1.93E-04 | 4.82E-03 |
| 17404122 | Slc10a5       | 0.54 | 1.03E-04 | 3.01E-03 |
| 17388332 | Creb3l1       | 0.54 | 9.91E-08 | 1.42E-05 |
| 17361546 | Cst6          | 0.54 | 1.17E-05 | 6.02E-04 |
| 17470095 | Fxyd4         | 0.54 | 3.77E-04 | 7.92E-03 |
| 17443185 | Mlxipl        | 0.54 | 8.60E-07 | 7.70E-05 |
| 17373283 | Lrp4          | 0.53 | 4.75E-06 | 2.93E-04 |
| 17220591 | 5033404E19Rik | 0.53 | 1.64E-04 | 4.29E-03 |
| 17230484 | Ephx1         | 0.53 | 8.64E-07 | 7.70E-05 |
| 17376124 | Slc20a1       | 0.53 | 4.95E-08 | 9.01E-06 |
| 17354730 | Slc26a2       | 0.53 | 3.62E-07 | 3.93E-05 |
| 17260644 | Ddc           | 0.53 | 1.76E-06 | 1.35E-04 |
| 17517289 | Exph5         | 0.53 | 3.48E-04 | 7.49E-03 |
| 17449406 | Sult1d1       | 0.53 | 2.58E-07 | 3.05E-05 |
| 17456736 | Ahcyl2        | 0.53 | 6.93E-07 | 6.61E-05 |
| 17490589 | Fcgrt         | 0.53 | 4.39E-06 | 2.76E-04 |
| 17400048 | Rorc          | 0.53 | 4.23E-06 | 2.69E-04 |
| 17283556 | Ifi27l2b      | 0.53 | 6.93E-06 | 3.98E-04 |
| 17496354 | Sult1a1       | 0.53 | 1.92E-04 | 4.80E-03 |
| 17520631 | Rbp2          | 0.52 | 1.00E-06 | 8.54E-05 |
| 17273864 | Apob          | 0.52 | 2.87E-05 | 1.19E-03 |
| 17449710 | Cxcl9         | 0.52 | 3.73E-04 | 7.86E-03 |
| 17534960 | Fhl1          | 0.52 | 4.73E-07 | 4.70E-05 |
| 17464539 | Hepacam2      | 0.52 | 2.15E-05 | 9.60E-04 |
| 17408323 | Hsd3b2        | 0.52 | 7.99E-05 | 2.49E-03 |
| 17319091 | Lgals2        | 0.52 | 2.91E-04 | 6.57E-03 |
| 17504829 | Hsd11b2       | 0.52 | 3.93E-06 | 2.53E-04 |
| 17512732 | Nqo1          | 0.52 | 5.53E-06 | 3.32E-04 |
| 17516098 | Siae          | 0.51 | 1.68E-05 | 7.95E-04 |
| 17256196 | Rapgef1       | 0.51 | 1.03E-05 | 5.46E-04 |
| 17321780 | Cela1         | 0.51 | 1.24E-06 | 9.89E-05 |
| 17289103 | Serinc5       | 0.51 | 3.67E-07 | 3.95E-05 |
| 17511693 | Ces1d         | 0.51 | 4.49E-05 | 1.63E-03 |
| 17226655 | C4bp          | 0.51 | 2.59E-05 | 1.11E-03 |
| 17321078 | Vdr           | 0.50 | 9.33E-09 | 2.54E-06 |
| 17284948 | Akr1c19       | 0.50 | 3.65E-05 | 1.44E-03 |
| 17267066 | Dhrs11        | 0.50 | 3.51E-06 | 2.32E-04 |
| 17375997 | Mertk         | 0.49 | 1.25E-04 | 3.45E-03 |
| 17294934 | Thbs4         | 0.49 | 9.00E-08 | 1.35E-05 |
| 17509031 | Gm6329        | 0.49 | 2.24E-04 | 5.38E-03 |
| 17257906 | Map2k6        | 0.48 | 3.23E-05 | 1.30E-03 |
| 17307463 | Ebpl          | 0.48 | 5.59E-06 | 3.33E-04 |

|          |               |      |          |          |
|----------|---------------|------|----------|----------|
| 17235730 | 2210404007Rik | 0.48 | 3.45E-07 | 3.81E-05 |
| 17488057 | Cyp2s1        | 0.48 | 3.00E-06 | 2.08E-04 |
| 17482752 | 2010110P09Rik | 0.48 | 7.35E-08 | 1.14E-05 |
| 17280817 | Scin          | 0.48 | 7.21E-08 | 1.14E-05 |
| 17268120 | Pdk2          | 0.48 | 3.66E-09 | 1.24E-06 |
| 17237811 | Lrig3         | 0.48 | 1.17E-07 | 1.57E-05 |
| 17340135 | Slc3a1        | 0.47 | 1.04E-07 | 1.47E-05 |
| 17359251 | Cyp2c65       | 0.47 | 3.11E-06 | 2.13E-04 |
| 17342038 | Fahd1         | 0.47 | 1.74E-07 | 2.18E-05 |
| 17496584 | Zg16          | 0.47 | 5.10E-06 | 3.10E-04 |
| 17507605 | Gas6          | 0.46 | 3.05E-08 | 5.94E-06 |
| 17343488 | Cyp4f14       | 0.46 | 3.01E-07 | 3.46E-05 |
| 17224015 | Abca12        | 0.46 | 4.85E-06 | 2.98E-04 |
| 17277267 | Aldh6a1       | 0.45 | 1.17E-05 | 6.02E-04 |
| 17435643 | Rnf32         | 0.45 | 1.33E-04 | 3.62E-03 |
| 17247948 | Efemp1        | 0.45 | 8.87E-06 | 4.81E-04 |
| 17403070 | Adh1          | 0.45 | 2.88E-08 | 5.74E-06 |
| 17346401 | Acer1         | 0.45 | 1.57E-06 | 1.23E-04 |
| 17511731 | Ces1f         | 0.44 | 1.87E-04 | 4.73E-03 |
| 17348860 | Mep1b         | 0.44 | 4.56E-08 | 8.38E-06 |
| 17539494 | Ace2          | 0.44 | 1.84E-06 | 1.39E-04 |
| 17363429 | Aldh1a7       | 0.43 | 1.35E-04 | 3.67E-03 |
| 17409154 | Gstm1         | 0.43 | 1.01E-04 | 2.96E-03 |
| 17246381 | Mettl7b       | 0.43 | 2.24E-08 | 4.86E-06 |
| 17476288 | Cox7a1        | 0.43 | 1.81E-08 | 4.13E-06 |
| 17409142 | Gstm2         | 0.43 | 1.01E-05 | 5.42E-04 |
| 17327264 | Cbr3          | 0.43 | 7.99E-09 | 2.25E-06 |
| 17407378 | Lor           | 0.42 | 5.89E-07 | 5.76E-05 |
| 17434524 | Abcb1a        | 0.42 | 2.29E-08 | 4.87E-06 |
| 17448001 | Ppargc1a      | 0.42 | 1.67E-07 | 2.14E-05 |
| 17417946 | Guca2a        | 0.41 | 2.38E-08 | 4.90E-06 |
| 17253181 | Tmigd1        | 0.41 | 5.47E-08 | 9.64E-06 |
| 17467269 | Hpgds         | 0.41 | 2.58E-05 | 1.10E-03 |
| 17321683 | Slc11a2       | 0.41 | 1.33E-07 | 1.76E-05 |
| 17534528 | Xpnpep2       | 0.41 | 2.40E-08 | 4.90E-06 |
| 17362861 | Ms4a18        | 0.41 | 2.93E-05 | 1.20E-03 |
| 17466322 | Trpv6         | 0.41 | 4.96E-09 | 1.50E-06 |
| 17360312 | Add3          | 0.41 | 2.44E-08 | 4.91E-06 |
| 17405908 | Bche          | 0.41 | 7.25E-08 | 1.14E-05 |
| 17456161 | Cav1          | 0.41 | 1.07E-06 | 8.93E-05 |
| 17295278 | Hexb          | 0.40 | 3.19E-08 | 6.13E-06 |
| 17309785 | Sepp1         | 0.40 | 1.02E-08 | 2.69E-06 |
| 17362839 | Ms4a10        | 0.40 | 7.11E-09 | 2.06E-06 |
| 17394063 | Ada           | 0.39 | 3.86E-09 | 1.28E-06 |
| 17450354 | Hsd17b13      | 0.39 | 6.22E-07 | 6.01E-05 |

|          |               |      |          |          |
|----------|---------------|------|----------|----------|
| 17236393 | Slc5a8        | 0.39 | 5.79E-08 | 9.98E-06 |
| 17337089 | H2-Q1         | 0.38 | 9.27E-07 | 8.09E-05 |
| 17312567 | Gpt           | 0.38 | 1.10E-05 | 5.74E-04 |
| 17404091 | Fabp4         | 0.38 | 2.67E-04 | 6.10E-03 |
| 17458407 | Abp1          | 0.38 | 2.29E-09 | 8.43E-07 |
| 17236182 | Timp3         | 0.38 | 2.64E-07 | 3.08E-05 |
| 17345066 | Mep1a         | 0.37 | 3.66E-09 | 1.24E-06 |
| 17484477 | Prap1         | 0.37 | 6.08E-06 | 3.58E-04 |
| 17290163 | Ccl28         | 0.37 | 2.05E-08 | 4.57E-06 |
| 17295386 | Tmem171       | 0.37 | 2.21E-07 | 2.68E-05 |
| 17545899 | S100g         | 0.37 | 1.04E-07 | 1.47E-05 |
| 17364440 | Cyp2c69       | 0.37 | 3.13E-05 | 1.27E-03 |
| 17450838 | Rnf212        | 0.37 | 8.96E-07 | 7.92E-05 |
| 17480044 | Prss23        | 0.36 | 1.34E-08 | 3.29E-06 |
| 17330799 | Gm5485        | 0.36 | 8.61E-10 | 4.01E-07 |
| 17400773 | Fmo5          | 0.36 | 9.50E-08 | 1.40E-05 |
| 17425609 | D630039A03Rik | 0.36 | 1.77E-06 | 1.35E-04 |
| 17482897 | Aqp8          | 0.36 | 9.90E-08 | 1.42E-05 |
| 17211405 | Gsta3         | 0.36 | 2.33E-06 | 1.68E-04 |
| 17225210 | Alpi          | 0.35 | 8.61E-08 | 1.30E-05 |
| 17277760 | 5430427M07Rik | 0.35 | 1.03E-06 | 8.68E-05 |
| 17504572 | Ces2g         | 0.34 | 2.11E-06 | 1.54E-04 |
| 17540378 | Maob          | 0.34 | 9.45E-06 | 5.11E-04 |
| 17503926 | Mt4           | 0.32 | 2.65E-05 | 1.12E-03 |
| 17475870 | Sycn          | 0.32 | 2.40E-08 | 4.90E-06 |
| 17504477 | Ces2a         | 0.31 | 1.38E-05 | 6.86E-04 |
| 17319707 | Cyp2d26       | 0.31 | 2.03E-08 | 4.57E-06 |
| 17506532 | Dpep1         | 0.31 | 5.52E-09 | 1.64E-06 |
| 17345989 | Sult1c2       | 0.30 | 8.34E-08 | 1.27E-05 |
| 17322750 | Abat          | 0.30 | 3.23E-08 | 6.14E-06 |
| 17409130 | Gstm3         | 0.29 | 9.79E-09 | 2.63E-06 |
| 17376191 | Tgm3          | 0.29 | 7.10E-10 | 3.43E-07 |
| 17504541 | Ces2e         | 0.29 | 1.06E-10 | 1.12E-07 |
| 17504512 | Ces2c         | 0.29 | 8.66E-09 | 2.40E-06 |
| 17329847 | Osta          | 0.28 | 1.70E-09 | 7.20E-07 |
| 17516978 | Fam55d        | 0.26 | 1.64E-08 | 3.81E-06 |
| 17526663 | Fam55b        | 0.26 | 2.34E-06 | 1.69E-04 |
| 17252183 | Eno3          | 0.26 | 9.24E-11 | 1.04E-07 |
| 17317442 | Gsdmc2        | 0.25 | 7.91E-06 | 4.38E-04 |
| 17501250 | Hpgd          | 0.25 | 4.17E-12 | 1.01E-08 |
| 17472114 | Plbd1         | 0.24 | 5.61E-10 | 3.11E-07 |
| 17348833 | Ttr           | 0.24 | 6.49E-10 | 3.23E-07 |
| 17402350 | Fabp2         | 0.24 | 1.49E-10 | 1.40E-07 |
| 17507829 | Defb37        | 0.24 | 2.19E-05 | 9.73E-04 |
| 17408336 | Hsd3b3        | 0.22 | 1.04E-08 | 2.70E-06 |

|          |          |      |          |          |
|----------|----------|------|----------|----------|
| 17400862 | Hmgcs2   | 0.22 | 4.82E-09 | 1.50E-06 |
| 17397750 | Tm4sf4   | 0.20 | 4.46E-10 | 2.78E-07 |
| 17322075 | Krt4     | 0.20 | 3.47E-07 | 3.81E-05 |
| 17408360 | Hao2     | 0.17 | 1.30E-10 | 1.29E-07 |
| 17425233 | Aldob    | 0.16 | 1.98E-09 | 7.77E-07 |
| 17359239 | Cyp2c55  | 0.15 | 1.73E-11 | 2.93E-08 |
| 17360785 | Pnliprp2 | 0.15 | 1.96E-09 | 7.77E-07 |

**Supplementary Table 1: IL22 responsive genes in mouse colonoids.** 859 genes are differentially expressed ( $q$ -value  $\leq 0.01$ ) after treatment with IL22. The data are sorted by decreasing values of the estimated expression fold change relative to control samples.

Supplementary Table 2

| Transcript Cluster id | Gene          | Fold change | p-value  | q-value  |
|-----------------------|---------------|-------------|----------|----------|
| 17237978              | Ddit3         | 9.01        | 8.95E-13 | 1.51E-08 |
| 17374807              | Chac1         | 8.01        | 7.61E-11 | 1.52E-07 |
| 17392925              | Trib3         | 7.47        | 1.57E-07 | 6.31E-05 |
| 17234423              | Derl3         | 5.74        | 4.98E-09 | 4.38E-06 |
| 17504005              | Herpud1       | 5.63        | 2.90E-12 | 2.45E-08 |
| 17397421              | Slc7a11       | 4.81        | 1.08E-08 | 8.69E-06 |
| 17468143              | Mthfd2        | 4.58        | 8.09E-11 | 1.52E-07 |
| 17313998              | Creld2        | 4.07        | 1.20E-11 | 6.77E-08 |
| 17513641              | Slc7a5        | 3.96        | 3.90E-11 | 9.42E-08 |
| 17277396              | Jdp2          | 3.95        | 3.88E-09 | 4.11E-06 |
| 17303412              | Acox2         | 3.69        | 1.68E-10 | 2.58E-07 |
| 17328625              | Sdf2l1        | 3.32        | 9.04E-11 | 1.53E-07 |
| 17445440              | Steap1        | 3.28        | 1.81E-08 | 1.02E-05 |
| 17370103              | Grp78 (Hspa5) | 3.27        | 3.06E-11 | 9.42E-08 |
| 17471484              | Clec2e        | 3.25        | 1.32E-09 | 1.87E-06 |
| 17362453              | Slc3a2        | 3.15        | 3.66E-11 | 9.42E-08 |
| 17356583              | Syvn1         | 3.15        | 2.83E-11 | 9.42E-08 |
| 17503446              | Gpt2          | 2.89        | 7.05E-05 | 6.44E-03 |
| 17314115              | Adm2          | 2.88        | 2.10E-08 | 1.11E-05 |
| 17453124              | Psph          | 2.78        | 1.40E-08 | 9.49E-06 |
| 17515335              | Gm6484        | 2.77        | 7.24E-07 | 2.11E-04 |
| 17455401              | Slc7a1        | 2.76        | 1.33E-08 | 9.45E-06 |
| 17280893              | Dnajb9        | 2.76        | 4.27E-09 | 4.25E-06 |
| 17516564              | Hyou1         | 2.75        | 1.80E-09 | 2.19E-06 |
| 17529549              | Snhg5         | 2.70        | 1.34E-08 | 9.45E-06 |
| 17490878              | Ppp1r15a      | 2.69        | 5.18E-09 | 4.38E-06 |
| 17407934              | Gm129         | 2.62        | 1.05E-07 | 4.56E-05 |
| 17292634              | Nfil3         | 2.44        | 1.12E-06 | 2.97E-04 |
| 17364521              | Aldh18a1      | 2.41        | 1.59E-08 | 9.81E-06 |
| 17365014              | Erlin1        | 2.36        | 1.46E-08 | 9.53E-06 |
| 17464718              | Asns          | 2.33        | 1.81E-09 | 2.19E-06 |
| 17530782              | Manf          | 2.26        | 1.68E-08 | 9.81E-06 |
| 17389093              | 2700007P21Rik | 2.26        | 2.41E-06 | 5.22E-04 |
| 17545440              | Tspsyl2       | 2.26        | 1.21E-05 | 1.70E-03 |
| 17283056              | Sel1l         | 2.23        | 2.05E-08 | 1.11E-05 |
| 17271861              | C630004H02Rik | 2.22        | 1.63E-08 | 9.81E-06 |
| 17231033              | Atf3          | 2.22        | 3.38E-08 | 1.68E-05 |
| 17325619              | Tmem39a       | 2.19        | 4.84E-09 | 4.38E-06 |
| 17315312              | Soat2         | 2.18        | 7.66E-06 | 1.26E-03 |
| 17419389              | Snhg12        | 2.15        | 2.75E-06 | 5.66E-04 |
| 17450091              | 5430416N02Rik | 2.15        | 3.19E-08 | 1.63E-05 |
| 17300504              | Pck2          | 2.15        | 2.78E-06 | 5.66E-04 |

|          |               |      |          |          |
|----------|---------------|------|----------|----------|
| 17229556 | Atf6          | 2.10 | 1.34E-07 | 5.54E-05 |
| 17402361 | Sec24d        | 2.07 | 6.10E-07 | 1.84E-04 |
| 17388261 | Atg13         | 2.07 | 1.28E-06 | 3.23E-04 |
| 17214857 | Ccl20         | 2.04 | 6.29E-05 | 5.95E-03 |
| 17452552 | Rhof          | 2.04 | 3.07E-07 | 1.08E-04 |
| 17433221 | Slc25a33      | 2.02 | 1.47E-06 | 3.51E-04 |
| 17430861 | Sesn2         | 2.00 | 8.96E-08 | 4.09E-05 |
| 17274249 | Pdia6         | 1.96 | 3.50E-09 | 3.95E-06 |
| 17321318 | Fkbp11        | 1.94 | 1.04E-05 | 1.59E-03 |
| 17490391 | Atf5          | 1.93 | 1.05E-05 | 1.59E-03 |
| 17359008 | March5        | 1.92 | 1.33E-06 | 3.31E-04 |
| 17235320 | Reep6         | 1.88 | 2.22E-07 | 8.53E-05 |
| 17498271 | Cars          | 1.88 | 1.47E-06 | 3.51E-04 |
| 17320928 | Slc38a2       | 1.87 | 1.15E-08 | 8.88E-06 |
| 17448645 | Nfxl1         | 1.86 | 8.11E-07 | 2.32E-04 |
| 17313495 | Ccdc134       | 1.86 | 6.43E-06 | 1.10E-03 |
| 17407190 | Hax1          | 1.85 | 2.04E-07 | 8.03E-05 |
| 17245902 | Shmt2         | 1.84 | 9.42E-07 | 2.61E-04 |
| 17341132 | Phf10         | 1.84 | 3.56E-08 | 1.72E-05 |
| 17313100 | Atf4          | 1.84 | 1.27E-05 | 1.73E-03 |
| 17493571 | Tsku          | 1.83 | 2.22E-06 | 4.94E-04 |
| 17302724 | Dnajc3        | 1.83 | 4.50E-08 | 2.12E-05 |
| 17245511 | Xpot          | 1.83 | 2.17E-06 | 4.89E-04 |
| 17277134 | Acot2         | 1.83 | 3.46E-06 | 6.89E-04 |
| 17219963 | Pppde1        | 1.82 | 1.05E-05 | 1.59E-03 |
| 17408273 | Phgdh         | 1.78 | 1.11E-05 | 1.65E-03 |
| 17444481 | Bhlha15       | 1.78 | 1.08E-04 | 8.88E-03 |
| 17489707 | Cebpg         | 1.76 | 2.27E-06 | 4.98E-04 |
| 17379938 | Cebpb         | 1.76 | 1.18E-05 | 1.68E-03 |
| 17478958 | 1810008118Rik | 1.75 | 4.31E-06 | 8.01E-04 |
| 17510114 | Gdf15         | 1.74 | 2.31E-05 | 2.75E-03 |
| 17261425 | Stc2          | 1.72 | 1.28E-05 | 1.73E-03 |
| 17219546 | Slamf9        | 1.71 | 1.77E-05 | 2.20E-03 |
| 17500327 | Eif4ebp1      | 1.70 | 2.46E-07 | 9.04E-05 |
| 17421550 | Mthfr         | 1.70 | 1.25E-04 | 9.79E-03 |
| 17311602 | Mtbp          | 1.70 | 8.06E-06 | 1.31E-03 |
| 17410809 | Lmo4          | 1.69 | 2.75E-05 | 3.06E-03 |
| 17501250 | Hpgd          | 1.69 | 2.28E-07 | 8.59E-05 |
| 17492114 | Chd2          | 1.68 | 1.03E-06 | 2.80E-04 |
| 17530233 | Srprb         | 1.68 | 5.60E-07 | 1.76E-04 |
| 17287206 | Iars          | 1.68 | 3.52E-07 | 1.22E-04 |
| 17500172 | Ppapdc1b      | 1.67 | 9.88E-08 | 4.40E-05 |
| 17482095 | Nucb2         | 1.67 | 1.20E-07 | 5.08E-05 |
| 17483058 | Gm20367       | 1.66 | 9.21E-05 | 7.91E-03 |
| 17260869 | Slc1a4        | 1.65 | 1.32E-05 | 1.75E-03 |

|          |               |      |          |          |
|----------|---------------|------|----------|----------|
| 17479875 | Stard5        | 1.65 | 4.28E-06 | 8.01E-04 |
| 17440748 | Ficd          | 1.65 | 8.05E-05 | 7.13E-03 |
| 17354036 | Lars          | 1.64 | 4.48E-07 | 1.43E-04 |
| 17272745 | Usp36         | 1.64 | 1.09E-05 | 1.63E-03 |
| 17324305 | Dnajb11       | 1.63 | 1.04E-06 | 2.80E-04 |
| 17458771 | Gars          | 1.63 | 4.16E-07 | 1.38E-04 |
| 17316021 | Tars          | 1.63 | 4.08E-06 | 7.75E-04 |
| 17217440 | Cyb5r1        | 1.62 | 1.92E-05 | 2.34E-03 |
| 17330967 | Nfkbiz        | 1.62 | 2.66E-05 | 3.04E-03 |
| 17409328 | Sars          | 1.62 | 3.06E-07 | 1.08E-04 |
| 17331533 | Hspa13        | 1.62 | 1.23E-04 | 9.69E-03 |
| 17337984 | Gtpbp2        | 1.61 | 1.64E-05 | 2.08E-03 |
| 17357168 | Stx5a         | 1.60 | 1.16E-06 | 3.02E-04 |
| 17478998 | H47           | 1.59 | 4.36E-07 | 1.42E-04 |
| 17350790 | Prrc1         | 1.58 | 3.57E-06 | 6.95E-04 |
| 17261730 | Rars          | 1.57 | 5.75E-07 | 1.77E-04 |
| 17529449 | 4922501C03Rik | 1.57 | 7.99E-05 | 7.11E-03 |
| 17250734 | 2410006H16Rik | 1.57 | 1.22E-06 | 3.13E-04 |
| 17521621 | Amigo3        | 1.56 | 8.74E-05 | 7.58E-03 |
| 17346210 | Ticam1        | 1.56 | 5.84E-06 | 1.03E-03 |
| 17418952 | Yars          | 1.55 | 1.38E-05 | 1.79E-03 |
| 17496345 | Nupr1         | 1.55 | 1.88E-06 | 4.31E-04 |
| 17220548 | Eprs          | 1.55 | 1.36E-06 | 3.34E-04 |
| 17509282 | Cdkn2aip      | 1.54 | 2.52E-06 | 5.39E-04 |
| 17262300 | Sqstm1        | 1.54 | 1.18E-05 | 1.68E-03 |
| 17317203 | Derl1         | 1.54 | 1.73E-06 | 4.07E-04 |
| 17357126 | Snhg1         | 1.54 | 8.30E-05 | 7.31E-03 |
| 17471062 | Tapbp1        | 1.54 | 8.34E-06 | 1.34E-03 |
| 17508722 | Leprotl1      | 1.54 | 3.12E-06 | 6.29E-04 |
| 17280842 | Ifrd1         | 1.53 | 6.52E-06 | 1.10E-03 |
| 17314061 | Trabd         | 1.53 | 3.52E-06 | 6.92E-04 |
| 17229948 | Dusp23        | 1.53 | 3.74E-05 | 3.83E-03 |
| 17326428 | Cpox          | 1.53 | 4.50E-05 | 4.45E-03 |
| 17445426 | Steap2        | 1.52 | 7.08E-05 | 6.44E-03 |
| 17310673 | Ank           | 1.52 | 3.74E-05 | 3.83E-03 |
| 17361090 | BC021614      | 1.52 | 2.69E-05 | 3.04E-03 |
| 17411751 | Trp53inp1     | 1.52 | 6.92E-06 | 1.16E-03 |
| 17328132 | Txndc11       | 1.52 | 2.46E-05 | 2.90E-03 |
| 17535298 | Mtm1          | 1.51 | 6.55E-05 | 6.06E-03 |
| 17283930 | Wars          | 1.51 | 1.84E-06 | 4.27E-04 |
| 17255387 | Slc35b1       | 1.51 | 9.42E-07 | 2.61E-04 |
| 17348435 | Cables1       | 1.51 | 1.80E-05 | 2.22E-03 |
| 17330654 | BC016579      | 1.50 | 2.52E-05 | 2.96E-03 |
| 17311649 | Gm20184       | 1.50 | 3.90E-06 | 7.49E-04 |
| 17245850 | Mars          | 1.49 | 6.53E-06 | 1.10E-03 |

|          |               |      |          |          |
|----------|---------------|------|----------|----------|
| 17423674 | 1810074P20Rik | 1.49 | 5.66E-06 | 1.02E-03 |
| 17274123 | Nbas          | 1.49 | 5.78E-05 | 5.56E-03 |
| 17356099 | Cdk2ap2       | 1.49 | 1.31E-05 | 1.75E-03 |
| 17477897 | Bcat2         | 1.48 | 2.61E-06 | 5.51E-04 |
| 17343744 | Slc39a7       | 1.47 | 4.67E-06 | 8.49E-04 |
| 17268356 | Nfe2l1        | 1.47 | 1.15E-05 | 1.68E-03 |
| 17431394 | Clic4         | 1.47 | 1.05E-05 | 1.59E-03 |
| 17243738 | Hsp90b1       | 1.45 | 1.26E-05 | 1.73E-03 |
| 17505851 | Nudt7         | 1.45 | 1.19E-04 | 9.48E-03 |
| 17464803 | Ica1          | 1.45 | 1.68E-05 | 2.11E-03 |
| 17447544 | Wfs1          | 1.45 | 1.00E-04 | 8.35E-03 |
| 17295482 | Mtap1b        | 1.44 | 1.26E-04 | 9.84E-03 |
| 17439064 | Uso1          | 1.44 | 3.49E-05 | 3.69E-03 |
| 17241137 | Unc5b         | 1.43 | 1.02E-04 | 8.47E-03 |
| 17246967 | Xbp1          | 1.43 | 1.33E-05 | 1.75E-03 |
| 17377092 | Sec23b        | 1.42 | 6.48E-05 | 6.02E-03 |
| 17435867 | Tmem214       | 1.42 | 9.02E-06 | 1.43E-03 |
| 17397968 | Arhgef26      | 1.41 | 9.58E-05 | 8.16E-03 |
| 17439741 | Aff1          | 1.40 | 1.33E-05 | 1.75E-03 |
| 17530322 | Uba5          | 1.39 | 3.40E-05 | 3.64E-03 |
| 17297100 | Kctd6         | 1.39 | 2.67E-05 | 3.04E-03 |
| 17353420 | Fam13b        | 1.38 | 2.73E-05 | 3.06E-03 |
| 17511183 | Calr          | 1.38 | 1.27E-05 | 1.73E-03 |
| 17376649 | Crls1         | 1.38 | 9.75E-05 | 8.16E-03 |
| 17350356 | Eif1a         | 1.37 | 1.24E-05 | 1.73E-03 |
| 17355009 | Nars          | 1.37 | 3.42E-05 | 3.64E-03 |
| 17344114 | 1110038B12Rik | 1.37 | 5.30E-05 | 5.19E-03 |
| 17492051 | Arrdc4        | 1.36 | 3.29E-05 | 3.57E-03 |
| 17221186 | Snhg6         | 1.36 | 4.23E-05 | 4.21E-03 |
| 17305167 | Ghitm         | 1.35 | 3.52E-05 | 3.70E-03 |
| 17331044 | Tfg           | 1.35 | 2.60E-05 | 3.03E-03 |
| 17439029 | Areg          | 1.34 | 2.67E-05 | 3.04E-03 |
| 17379864 | 1500012F01Rik | 1.34 | 2.80E-05 | 3.09E-03 |
| 17334365 | Zfp598        | 1.34 | 1.15E-04 | 9.22E-03 |
| 17431496 | Pnrc2         | 1.34 | 9.65E-05 | 8.16E-03 |
| 17383188 | Surf4         | 1.33 | 7.49E-05 | 6.74E-03 |
| 17358119 | Zfand5        | 1.32 | 6.75E-05 | 6.20E-03 |
| 17410376 | Ostc          | 1.32 | 7.16E-05 | 6.48E-03 |
| 17400599 | Txnip         | 1.31 | 2.95E-05 | 3.24E-03 |
| 17272287 | Srp68         | 1.31 | 1.21E-04 | 9.54E-03 |
| 17452405 | Atp2a2        | 1.31 | 1.10E-04 | 8.96E-03 |
| 17514435 | Casp4         | 1.30 | 9.75E-05 | 8.16E-03 |
| 17225472 | Zfp330        | 1.28 | 1.07E-04 | 8.84E-03 |
| 17367095 | Tmem236       | 0.75 | 5.78E-05 | 5.56E-03 |
| 17230550 | Lbr           | 0.74 | 4.02E-05 | 4.02E-03 |



|          |               |      |          |          |
|----------|---------------|------|----------|----------|
| 17367916 | Lrrc26        | 0.73 | 1.11E-04 | 8.96E-03 |
| 17313087 | Mgat3         | 0.73 | 3.57E-05 | 3.70E-03 |
| 17295233 | Hmgcr         | 0.73 | 1.15E-05 | 1.68E-03 |
| 17248476 | Pank3         | 0.73 | 4.95E-05 | 4.87E-03 |
| 17440257 | Pcgf3         | 0.72 | 2.70E-05 | 3.04E-03 |
| 17274889 | Gdap10        | 0.72 | 1.10E-04 | 8.96E-03 |
| 17429632 | Mfsd2a        | 0.72 | 9.17E-05 | 7.91E-03 |
| 17409463 | Fam102b       | 0.72 | 1.16E-04 | 9.28E-03 |
| 17515315 | Ldlr          | 0.71 | 2.30E-05 | 2.75E-03 |
| 17311807 | Sqle          | 0.71 | 8.61E-05 | 7.51E-03 |
| 17236882 | Dusp6         | 0.71 | 1.69E-05 | 2.11E-03 |
| 17229466 | Hsd17b7       | 0.71 | 6.42E-05 | 6.02E-03 |
| 17513311 | 2310061C15Rik | 0.71 | 3.97E-05 | 4.02E-03 |
| 17350740 | Lmnb1         | 0.70 | 3.82E-05 | 3.89E-03 |
| 17356314 | Mrpl11        | 0.70 | 1.50E-05 | 1.92E-03 |
| 17447831 | Fgfbp1        | 0.69 | 6.07E-06 | 1.06E-03 |
| 17290173 | Hmgcs1        | 0.69 | 4.54E-06 | 8.34E-04 |
| 17269521 | Acly          | 0.69 | 6.30E-05 | 5.95E-03 |
| 17460933 | Lsm3          | 0.68 | 7.72E-05 | 6.91E-03 |
| 17340943 | Mrpl18        | 0.68 | 1.18E-05 | 1.68E-03 |
| 17525894 | Sorl1         | 0.68 | 5.92E-05 | 5.65E-03 |
| 17251607 | Trappc1       | 0.68 | 5.40E-05 | 5.25E-03 |
| 17512868 | Chst4         | 0.68 | 8.43E-05 | 7.39E-03 |
| 17323828 | B3gnt5        | 0.67 | 3.57E-05 | 3.70E-03 |
| 17416325 | Dhcr24        | 0.67 | 2.64E-06 | 5.52E-04 |
| 17429057 | Ptprf         | 0.67 | 5.78E-06 | 1.03E-03 |
| 17481102 | Rrm1          | 0.67 | 1.14E-04 | 9.21E-03 |
| 17510707 | Lsm6          | 0.66 | 3.03E-05 | 3.30E-03 |
| 17511377 | Neto2         | 0.66 | 1.84E-05 | 2.25E-03 |
| 17514799 | 2200002K05Rik | 0.66 | 1.96E-05 | 2.37E-03 |
| 17326510 | Pros1         | 0.66 | 8.69E-06 | 1.39E-03 |
| 17221633 | Mcm3          | 0.64 | 6.48E-05 | 6.02E-03 |
| 17328432 | Mcm4          | 0.63 | 9.37E-06 | 1.47E-03 |
| 17442719 | Aacs          | 0.63 | 3.42E-05 | 3.64E-03 |
| 17338701 | Chaf1a        | 0.60 | 1.45E-05 | 1.88E-03 |
| 17402558 | Elovl6        | 0.59 | 4.01E-05 | 4.02E-03 |
| 17539979 | Glod5         | 0.57 | 7.16E-06 | 1.19E-03 |
| 17273348 | Fasn          | 0.57 | 6.73E-07 | 2.00E-04 |
| 17394694 | B4galt5       | 0.56 | 3.91E-07 | 1.32E-04 |
| 17357815 | Fam111a       | 0.50 | 9.63E-05 | 8.16E-03 |

**Supplementary Table 2: Tunicamycin responsive genes in mouse colonoids.** 217 genes are differentially expressed (q-value  $\leq 0.01$ ) after treatment with tunicamycin. The data are sorted by decreasing values of the estimated expression fold change relative to control samples.

Supplementary Table 3

| Transcript cluster id | Gene          | Fold change | p-value  | q-value  |
|-----------------------|---------------|-------------|----------|----------|
| 17459744              | Reg3b         | 155.14      | 1.10E-14 | 1.86E-10 |
| 17467973              | Reg3g         | 51.76       | 4.41E-12 | 5.74E-09 |
| 17491193              | Saa3          | 30.07       | 6.28E-10 | 1.52E-07 |
| 17399823              | S100a8        | 17.33       | 3.25E-12 | 5.00E-09 |
| 17234423              | Derl3         | 13.61       | 5.43E-11 | 2.81E-08 |
| 17392925              | Trib3         | 13.21       | 1.04E-08 | 1.01E-06 |
| 17374807              | Chac1         | 12.86       | 7.35E-12 | 8.88E-09 |
| 17346150              | Lrg1          | 12.36       | 1.38E-11 | 1.30E-08 |
| 17237978              | Ddit3         | 11.65       | 2.51E-13 | 7.08E-10 |
| 17505478              | Tat           | 10.67       | 4.37E-12 | 5.74E-09 |
| 17315743              | Osmr          | 9.63        | 1.99E-10 | 7.66E-08 |
| 17504005              | Herpud1       | 8.80        | 2.06E-13 | 7.08E-10 |
| 17253707              | Nos2          | 8.40        | 1.93E-09 | 3.13E-07 |
| 17397421              | Slc7a11       | 7.40        | 7.25E-10 | 1.63E-07 |
| 17313998              | Creld2        | 7.24        | 2.31E-13 | 7.08E-10 |
| 17314115              | Adm2          | 7.08        | 2.06E-11 | 1.83E-08 |
| 17326062              | Retnlb        | 6.90        | 6.90E-10 | 1.58E-07 |
| 17401261              | Bcl2l15       | 6.09        | 7.85E-09 | 8.05E-07 |
| 17468143              | Mthfd2        | 6.07        | 1.16E-11 | 1.22E-08 |
| 17214857              | Ccl20         | 5.86        | 5.67E-09 | 6.47E-07 |
| 17356583              | Syvn1         | 5.67        | 2.46E-13 | 7.08E-10 |
| 17513641              | Slc7a5        | 5.64        | 2.84E-12 | 4.80E-09 |
| 17490878              | Ppp1r15a      | 5.53        | 1.06E-11 | 1.20E-08 |
| 17407363              | S100a9        | 5.50        | 1.69E-09 | 2.91E-07 |
| 17328625              | Sdf2l1        | 5.50        | 1.63E-12 | 3.45E-09 |
| 17321318              | Fkbp11        | 5.33        | 5.30E-10 | 1.42E-07 |
| 17438955              | Cxcl5         | 5.31        | 5.15E-11 | 2.81E-08 |
| 17277396              | Jdp2          | 5.10        | 5.77E-10 | 1.48E-07 |
| 17254289              | Gm11428       | 5.00        | 2.52E-08 | 1.85E-06 |
| 17503446              | Gpt2          | 4.91        | 1.37E-06 | 3.99E-05 |
| 17402361              | Sec24d        | 4.89        | 1.18E-10 | 5.13E-08 |
| 17292634              | Nfil3         | 4.78        | 2.53E-09 | 3.70E-07 |
| 17385374              | Nr4a2         | 4.75        | 5.58E-09 | 6.42E-07 |
| 17516564              | Hyou1         | 4.74        | 1.38E-11 | 1.30E-08 |
| 17515335              | Gm6484        | 4.71        | 7.98E-09 | 8.09E-07 |
| 17362453              | Slc3a2        | 4.71        | 1.19E-12 | 2.86E-09 |
| 17471484              | Clec2e        | 4.68        | 6.25E-11 | 3.07E-08 |
| 17280893              | Dnajb9        | 4.67        | 3.84E-11 | 2.40E-08 |
| 17410905              | Al747448      | 4.66        | 6.24E-10 | 1.52E-07 |
| 17231033              | Atf3          | 4.53        | 2.61E-11 | 2.11E-08 |
| 17370103              | Grp78 (Hspa5) | 4.51        | 1.99E-12 | 3.73E-09 |
| 17313495              | Ccdc134       | 4.46        | 5.25E-10 | 1.42E-07 |

|          |               |      |          |          |
|----------|---------------|------|----------|----------|
| 17455401 | Slc7a1        | 4.36 | 2.08E-10 | 7.83E-08 |
| 17445440 | Steap1        | 4.29 | 1.92E-09 | 3.13E-07 |
| 17271861 | C630004H02Rik | 4.20 | 2.21E-11 | 1.87E-08 |
| 17286190 | Prl2a1        | 4.07 | 1.38E-06 | 4.01E-05 |
| 17283056 | Sel1l         | 3.96 | 4.75E-11 | 2.77E-08 |
| 17229556 | Atf6          | 3.93 | 1.51E-10 | 6.06E-08 |
| 17433221 | Slc25a33      | 3.87 | 1.27E-09 | 2.47E-07 |
| 17444481 | Bhlha15       | 3.84 | 2.00E-08 | 1.59E-06 |
| 17521621 | Amigo3        | 3.83 | 9.63E-10 | 1.98E-07 |
| 17383892 | Lcn2          | 3.81 | 9.53E-09 | 9.43E-07 |
| 17344765 | Trim15        | 3.77 | 6.36E-11 | 3.07E-08 |
| 17452552 | Rhof          | 3.66 | 4.26E-10 | 1.26E-07 |
| 17303412 | Acox2         | 3.65 | 1.82E-10 | 7.17E-08 |
| 17318089 | Ly6c1         | 3.62 | 1.02E-07 | 5.45E-06 |
| 17455954 | Tac1          | 3.55 | 5.03E-08 | 3.17E-06 |
| 17448645 | Nfxl1         | 3.54 | 3.52E-10 | 1.10E-07 |
| 17453124 | Psph          | 3.49 | 1.50E-09 | 2.74E-07 |
| 17395079 | Zbp1          | 3.48 | 9.02E-10 | 1.91E-07 |
| 17388261 | Atg13         | 3.47 | 3.92E-09 | 5.14E-07 |
| 17364521 | Aldh18a1      | 3.44 | 3.48E-10 | 1.10E-07 |
| 17529549 | Snhg5         | 3.32 | 1.66E-09 | 2.89E-07 |
| 17464718 | Asns          | 3.30 | 3.59E-11 | 2.40E-08 |
| 17306098 | Rnase1        | 3.25 | 2.35E-08 | 1.77E-06 |
| 17365014 | Erlin1        | 3.23 | 4.39E-10 | 1.26E-07 |
| 17325619 | Tmem39a       | 3.21 | 5.49E-11 | 2.81E-08 |
| 17378827 | Lbp           | 3.21 | 2.29E-08 | 1.76E-06 |
| 17254166 | Sifn2         | 3.16 | 1.09E-06 | 3.32E-05 |
| 17390738 | Duox2         | 3.16 | 1.47E-08 | 1.29E-06 |
| 17530233 | Srprb         | 3.12 | 1.02E-10 | 4.54E-08 |
| 17401345 | Ppm1j         | 3.11 | 6.90E-10 | 1.58E-07 |
| 17408885 | Chi3l7        | 3.08 | 1.02E-05 | 1.88E-04 |
| 17269404 | Krt16         | 3.06 | 4.81E-06 | 1.06E-04 |
| 17416212 | 1700024P16Rik | 3.05 | 1.87E-08 | 1.51E-06 |
| 17450091 | 5430416N02Rik | 3.01 | 5.79E-10 | 1.48E-07 |
| 17526836 | Tex12         | 3.00 | 1.69E-05 | 2.84E-04 |
| 17407934 | Gm129         | 2.92 | 3.29E-08 | 2.35E-06 |
| 17482095 | Nucb2         | 2.92 | 3.28E-11 | 2.40E-08 |
| 17331533 | Hspa13        | 2.92 | 4.08E-08 | 2.77E-06 |
| 17530782 | Manf          | 2.91 | 8.46E-10 | 1.81E-07 |
| 17420539 | Pla2g2a       | 2.86 | 1.31E-06 | 3.83E-05 |
| 17430861 | Sesn2         | 2.86 | 9.21E-10 | 1.92E-07 |
| 17315312 | Soat2         | 2.86 | 3.60E-07 | 1.46E-05 |
| 17288898 | Lysmd3        | 2.84 | 7.92E-08 | 4.44E-06 |
| 17226447 | Nckap5        | 2.84 | 2.35E-06 | 5.97E-05 |
| 17545440 | Tspyl2        | 2.81 | 1.15E-06 | 3.43E-05 |

|          |               |      |          |          |
|----------|---------------|------|----------|----------|
| 17238172 | Rdh16         | 2.79 | 3.06E-06 | 7.37E-05 |
| 17471062 | Tapbpl        | 2.79 | 8.22E-10 | 1.78E-07 |
| 17302724 | Dnajc3        | 2.78 | 1.28E-10 | 5.40E-08 |
| 17313000 | Kdelr3        | 2.76 | 3.77E-09 | 4.98E-07 |
| 17254047 | Ccl7          | 2.75 | 4.47E-07 | 1.71E-05 |
| 17399374 | Muc1          | 2.75 | 1.58E-07 | 7.68E-06 |
| 17274249 | Pdia6         | 2.74 | 3.75E-11 | 2.40E-08 |
| 17330967 | Nfkbiz        | 2.74 | 1.29E-08 | 1.18E-06 |
| 17464480 | 3010003L21Rik | 2.72 | 2.07E-05 | 3.33E-04 |
| 17464580 | Bet1          | 2.70 | 3.88E-07 | 1.56E-05 |
| 17308099 | Adam28        | 2.69 | 5.00E-06 | 1.09E-04 |
| 17245511 | Xpot          | 2.69 | 1.09E-08 | 1.04E-06 |
| 17261608 | Gabrp         | 2.69 | 2.88E-08 | 2.09E-06 |
| 17393789 | Tgm2          | 2.69 | 4.37E-09 | 5.60E-07 |
| 17448050 | Ccdc149       | 2.68 | 1.66E-07 | 8.01E-06 |
| 17274123 | Nbas          | 2.67 | 4.82E-09 | 5.92E-07 |
| 17350790 | Prrc1         | 2.66 | 9.72E-10 | 1.98E-07 |
| 17254176 | Sifn4         | 2.65 | 2.22E-06 | 5.73E-05 |
| 17333344 | Snora20       | 2.64 | 3.47E-05 | 4.96E-04 |
| 17419389 | Snhg12        | 2.64 | 2.41E-07 | 1.07E-05 |
| 17320928 | Slc38a2       | 2.61 | 9.71E-11 | 4.44E-08 |
| 17237851 | Avil          | 2.61 | 4.82E-08 | 3.08E-06 |
| 17497525 | Adam8         | 2.60 | 8.53E-08 | 4.67E-06 |
| 17330654 | BC016579      | 2.60 | 3.40E-09 | 4.70E-07 |
| 17396035 | Zbtb10        | 2.59 | 2.80E-08 | 2.04E-06 |
| 17404432 | Fndc3b        | 2.59 | 2.38E-09 | 3.59E-07 |
| 17500327 | Eif4ebp1      | 2.58 | 4.33E-10 | 1.26E-07 |
| 17438987 | Cxcl1         | 2.56 | 7.86E-08 | 4.44E-06 |
| 17438975 | Cxcl3         | 2.56 | 3.07E-04 | 2.72E-03 |
| 17300504 | Pck2          | 2.54 | 3.57E-07 | 1.45E-05 |
| 17495821 | Cdr2          | 2.53 | 4.53E-07 | 1.73E-05 |
| 17530322 | Uba5          | 2.53 | 6.40E-10 | 1.52E-07 |
| 17257165 | Arf2          | 2.52 | 6.53E-09 | 7.13E-07 |
| 17502573 | Hmox1         | 2.50 | 4.36E-09 | 5.60E-07 |
| 17514592 | Mmp7          | 2.50 | 1.75E-06 | 4.82E-05 |
| 17357168 | Stx5a         | 2.50 | 8.19E-10 | 1.78E-07 |
| 17344774 | Trim40        | 2.49 | 2.97E-07 | 1.27E-05 |
| 17439164 | Sep-11        | 2.48 | 2.01E-08 | 1.59E-06 |
| 17239546 | D10Bwg1379e   | 2.48 | 4.13E-08 | 2.77E-06 |
| 17355619 | Adnp2         | 2.48 | 3.12E-06 | 7.46E-05 |
| 17407190 | Hax1          | 2.45 | 3.28E-09 | 4.58E-07 |
| 17359008 | Mar-05        | 2.45 | 4.58E-08 | 2.98E-06 |
| 17389093 | 2700007P21Rik | 2.45 | 9.31E-07 | 2.93E-05 |
| 17324305 | Dnajb11       | 2.44 | 1.50E-09 | 2.74E-07 |
| 17498271 | Cars          | 2.44 | 3.76E-08 | 2.61E-06 |

|          |               |      |          |          |
|----------|---------------|------|----------|----------|
| 17535298 | Mtm1          | 2.43 | 2.91E-08 | 2.10E-06 |
| 17283930 | Wars          | 2.42 | 5.07E-10 | 1.42E-07 |
| 17487489 | Pvr           | 2.42 | 6.18E-09 | 6.90E-07 |
| 17438995 | Cxcl2         | 2.42 | 5.90E-08 | 3.58E-06 |
| 17353650 | Ecscr         | 2.41 | 2.32E-09 | 3.59E-07 |
| 17280561 | Dus4l         | 2.40 | 5.89E-04 | 4.51E-03 |
| 17316021 | Tars          | 2.40 | 8.05E-09 | 8.11E-07 |
| 17262300 | Sqstm1        | 2.39 | 7.97E-09 | 8.09E-07 |
| 17490912 | Fut2          | 2.38 | 7.18E-09 | 7.58E-07 |
| 17410332 | Ccdc109b      | 2.38 | 4.82E-07 | 1.80E-05 |
| 17241137 | Unc5b         | 2.36 | 1.34E-08 | 1.21E-06 |
| 17545764 | Ppef1         | 2.36 | 3.41E-05 | 4.90E-04 |
| 17218186 | Fam129a       | 2.36 | 4.49E-08 | 2.93E-06 |
| 17354463 | Mar-03        | 2.35 | 7.70E-09 | 7.94E-07 |
| 17539548 | Piga          | 2.35 | 6.86E-06 | 1.36E-04 |
| 17394153 | Sipi          | 2.35 | 2.09E-09 | 3.33E-07 |
| 17506230 | 6430548M08Rik | 2.34 | 4.25E-08 | 2.81E-06 |
| 17459425 | Eif2ak3       | 2.34 | 4.78E-08 | 3.08E-06 |
| 17314061 | Trabd         | 2.33 | 2.21E-09 | 3.50E-07 |
| 17478998 | H47           | 2.33 | 6.33E-10 | 1.52E-07 |
| 17482943 | Il4ra         | 2.32 | 1.21E-07 | 6.32E-06 |
| 17269333 | Krt36         | 2.31 | 6.32E-06 | 1.30E-04 |
| 17328132 | Txndc11       | 2.31 | 1.75E-08 | 1.47E-06 |
| 17435221 | Rint1         | 2.31 | 1.23E-08 | 1.14E-06 |
| 17439131 | Stbd1         | 2.30 | 1.32E-05 | 2.32E-04 |
| 17452054 | Oas2          | 2.30 | 2.64E-06 | 6.52E-05 |
| 17397426 | Ccrn4l        | 2.30 | 1.59E-07 | 7.72E-06 |
| 17211795 | Arid5a        | 2.29 | 9.75E-08 | 5.23E-06 |
| 17529322 | Ibtk          | 2.29 | 2.76E-09 | 3.92E-07 |
| 17548166 | LOC100862491  | 2.29 | 1.02E-03 | 7.02E-03 |
| 17522219 | Nme6          | 2.28 | 1.91E-07 | 8.96E-06 |
| 17485309 | Tssc4         | 2.28 | 1.31E-06 | 3.83E-05 |
| 17330742 | Plcx2         | 2.27 | 2.16E-06 | 5.63E-05 |
| 17355984 | Chka          | 2.27 | 5.76E-08 | 3.52E-06 |
| 17353663 | Tmem173       | 2.27 | 3.14E-08 | 2.25E-06 |
| 17500172 | Ppapdc1b      | 2.26 | 6.02E-10 | 1.52E-07 |
| 17348435 | Cables1       | 2.26 | 1.43E-08 | 1.26E-06 |
| 17377092 | Sec23b        | 2.26 | 1.25E-08 | 1.15E-06 |
| 17440748 | Ficd          | 2.25 | 6.96E-07 | 2.38E-05 |
| 17530802 | Rbm15b        | 2.24 | 1.22E-06 | 3.62E-05 |
| 17509565 | Anxa10        | 2.24 | 2.37E-04 | 2.23E-03 |
| 17341132 | Phf10         | 2.24 | 1.60E-09 | 2.86E-07 |
| 17311649 | Gm20184       | 2.24 | 2.31E-09 | 3.59E-07 |
| 17523332 | Nktr          | 2.24 | 1.91E-07 | 8.95E-06 |
| 17410809 | Lmo4          | 2.22 | 4.14E-07 | 1.63E-05 |

|          |               |      |          |          |
|----------|---------------|------|----------|----------|
| 17313100 | Atf4          | 2.21 | 8.76E-07 | 2.81E-05 |
| 17236196 | 1810014B01Rik | 2.21 | 1.57E-05 | 2.69E-04 |
| 17236091 | A1597468      | 2.21 | 4.18E-06 | 9.42E-05 |
| 17228871 | A1848100      | 2.19 | 4.68E-09 | 5.87E-07 |
| 17439021 | Ereg          | 2.19 | 2.65E-07 | 1.17E-05 |
| 17345315 | Mad211bp      | 2.19 | 5.32E-08 | 3.29E-06 |
| 17280842 | lfrd1         | 2.18 | 1.12E-08 | 1.06E-06 |
| 17467768 | Sh2d6         | 2.18 | 3.08E-04 | 2.72E-03 |
| 17338637 | Zfp959        | 2.18 | 1.30E-04 | 1.40E-03 |
| 17435867 | Tmem214       | 2.18 | 1.71E-09 | 2.91E-07 |
| 17458771 | Gars          | 2.18 | 2.60E-09 | 3.73E-07 |
| 17269391 | Krt14         | 2.18 | 2.36E-06 | 5.98E-05 |
| 17402519 | Tifa          | 2.18 | 1.49E-04 | 1.56E-03 |
| 17260668 | Grb10         | 2.18 | 1.70E-06 | 4.73E-05 |
| 17428253 | Slc5a9        | 2.17 | 6.02E-07 | 2.13E-05 |
| 17287206 | lars          | 2.17 | 4.61E-09 | 5.82E-07 |
| 17439064 | Uso1          | 2.16 | 1.49E-08 | 1.30E-06 |
| 17213666 | Klf7          | 2.16 | 9.19E-05 | 1.07E-03 |
| 17431234 | Cnksr1        | 2.16 | 8.49E-09 | 8.45E-07 |
| 17364948 | Slc25a28      | 2.16 | 2.19E-08 | 1.70E-06 |
| 17458592 | Hoxa1         | 2.16 | 1.76E-06 | 4.84E-05 |
| 17337984 | Gtpbp2        | 2.16 | 1.30E-07 | 6.61E-06 |
| 17400023 | Them4         | 2.16 | 1.75E-05 | 2.91E-04 |
| 17219963 | Pppde1        | 2.15 | 8.83E-07 | 2.82E-05 |
| 17290069 | Pelo          | 2.15 | 5.41E-07 | 1.98E-05 |
| 17515371 | 2310047B19Rik | 2.15 | 4.42E-05 | 5.97E-04 |
| 17431394 | Clic4         | 2.15 | 7.13E-09 | 7.58E-07 |
| 17343744 | Slc39a7       | 2.14 | 3.47E-09 | 4.73E-07 |
| 17245902 | Shmt2         | 2.14 | 9.05E-08 | 4.89E-06 |
| 17267504 | Lpo           | 2.14 | 1.27E-06 | 3.74E-05 |
| 17492114 | Chd2          | 2.14 | 1.85E-08 | 1.50E-06 |
| 17328153 | Zc3h7a        | 2.14 | 2.98E-06 | 7.22E-05 |
| 17515074 | Icam1         | 2.14 | 3.58E-07 | 1.45E-05 |
| 17347903 | Mcf2          | 2.14 | 8.30E-08 | 4.59E-06 |
| 17342674 | Mir3083       | 2.13 | 9.78E-04 | 6.78E-03 |
| 17245850 | Mars          | 2.13 | 8.35E-09 | 8.35E-07 |
| 17317203 | Derl1         | 2.13 | 4.55E-09 | 5.79E-07 |
| 17272745 | Usp36         | 2.13 | 1.41E-07 | 6.94E-06 |
| 17376649 | Crls1         | 2.12 | 1.62E-08 | 1.39E-06 |
| 17473810 | Zfp324        | 2.12 | 9.14E-05 | 1.06E-03 |
| 17478958 | 1810008118Rik | 2.12 | 2.12E-07 | 9.73E-06 |
| 17483058 | Gm20367       | 2.11 | 2.34E-06 | 5.95E-05 |
| 17533713 | Timp1         | 2.11 | 1.16E-04 | 1.28E-03 |
| 17357584 | Vps37c        | 2.10 | 7.20E-07 | 2.44E-05 |
| 17525492 | A630095E13Rik | 2.10 | 2.45E-05 | 3.79E-04 |

|          |               |      |          |          |
|----------|---------------|------|----------|----------|
| 17397462 | Rab33b        | 2.10 | 1.09E-07 | 5.80E-06 |
| 17391554 | Il1a          | 2.10 | 2.13E-04 | 2.06E-03 |
| 17490391 | Atf5          | 2.10 | 3.21E-06 | 7.62E-05 |
| 17493571 | Tsku          | 2.09 | 2.78E-07 | 1.20E-05 |
| 17409633 | Slc30a7       | 2.09 | 2.46E-06 | 6.18E-05 |
| 17235037 | Arid3a        | 2.09 | 4.15E-05 | 5.69E-04 |
| 17465906 | Creb3l2       | 2.09 | 6.53E-07 | 2.28E-05 |
| 17408273 | Phgdh         | 2.08 | 9.57E-07 | 3.00E-05 |
| 17492051 | Arrdc4        | 2.08 | 3.53E-09 | 4.77E-07 |
| 17354036 | Lars          | 2.08 | 6.80E-09 | 7.28E-07 |
| 17268356 | Nfe2l1        | 2.07 | 1.69E-08 | 1.43E-06 |
| 17356099 | Cdk2ap2       | 2.06 | 2.42E-08 | 1.80E-06 |
| 17311602 | Mtbp          | 2.06 | 3.35E-07 | 1.39E-05 |
| 17421550 | Mthfr         | 2.06 | 7.07E-06 | 1.39E-04 |
| 17447544 | Wfs1          | 2.06 | 1.28E-07 | 6.61E-06 |
| 17297100 | Kctd6         | 2.06 | 7.62E-09 | 7.91E-07 |
| 17514435 | Casp4         | 2.06 | 3.42E-09 | 4.70E-07 |
| 17277134 | Acot2         | 2.06 | 5.45E-07 | 1.99E-05 |
| 17423674 | 1810074P20Rik | 2.05 | 1.14E-08 | 1.07E-06 |
| 17489707 | Cebpg         | 2.05 | 1.84E-07 | 8.65E-06 |
| 17383188 | Surf4         | 2.05 | 5.51E-09 | 6.39E-07 |
| 17363177 | Tle4          | 2.05 | 4.00E-07 | 1.60E-05 |
| 17272619 | Socs3         | 2.05 | 1.30E-06 | 3.81E-05 |
| 17479317 | Isg20         | 2.04 | 2.94E-07 | 1.26E-05 |
| 17319806 | Arfgap3       | 2.04 | 7.63E-08 | 4.39E-06 |
| 17317266 | Fbxo32        | 2.04 | 3.09E-06 | 7.42E-05 |
| 17217440 | Cyb5r1        | 2.04 | 4.02E-07 | 1.60E-05 |
| 17286707 | Gcnt2         | 2.03 | 7.25E-07 | 2.45E-05 |
| 17463443 | Clec2h        | 2.03 | 2.58E-09 | 3.73E-07 |
| 17360097 | Cnnm2         | 2.03 | 1.12E-05 | 2.04E-04 |
| 17357771 | Osbp          | 2.03 | 4.98E-08 | 3.15E-06 |
| 17526195 | Hinfp         | 2.03 | 1.53E-06 | 4.35E-05 |
| 17379938 | Cebpb         | 2.02 | 1.26E-06 | 3.72E-05 |
| 17464803 | Ica1          | 2.02 | 2.17E-08 | 1.69E-06 |
| 17545785 | Cdkl5         | 2.02 | 1.62E-06 | 4.54E-05 |
| 17261730 | Rars          | 2.02 | 5.03E-09 | 6.04E-07 |
| 17214759 | Rhbdd1        | 2.02 | 5.48E-07 | 1.99E-05 |
| 17418952 | Yars          | 2.01 | 1.17E-07 | 6.13E-06 |
| 17508722 | Leprotl1      | 2.01 | 1.85E-08 | 1.50E-06 |
| 17344132 | Hspa1a        | 2.01 | 9.57E-07 | 3.00E-05 |
| 17243544 | Aldh1l2       | 2.01 | 7.74E-06 | 1.49E-04 |
| 17439741 | Aff1          | 2.01 | 6.66E-09 | 7.18E-07 |
| 17348791 | Dsg3          | 2.00 | 4.74E-08 | 3.06E-06 |
| 17264835 | Cd68          | 2.00 | 4.55E-07 | 1.73E-05 |
| 17359113 | O3far1        | 2.00 | 3.02E-07 | 1.29E-05 |

|          |            |      |          |          |
|----------|------------|------|----------|----------|
| 17512895 | Il34       | 1.99 | 1.83E-05 | 3.03E-04 |
| 17319565 | Pppde2     | 1.99 | 7.17E-08 | 4.19E-06 |
| 17410376 | Ostc       | 1.99 | 5.70E-09 | 6.47E-07 |
| 17469754 | Cidec      | 1.99 | 7.30E-07 | 2.45E-05 |
| 17521194 | Dusp7      | 1.98 | 5.04E-07 | 1.88E-05 |
| 17482133 | Tmc5       | 1.97 | 7.67E-07 | 2.53E-05 |
| 17361959 | Zfpl1      | 1.97 | 6.41E-07 | 2.26E-05 |
| 17297125 | Ptprg      | 1.97 | 1.97E-06 | 5.22E-05 |
| 17518526 | Clpx       | 1.97 | 5.17E-08 | 3.22E-06 |
| 17461433 | Edem1      | 1.97 | 1.37E-08 | 1.22E-06 |
| 17470105 | Csgalnact2 | 1.97 | 5.78E-05 | 7.30E-04 |
| 17358119 | Zfand5     | 1.97 | 7.54E-09 | 7.87E-07 |
| 17520073 | Nt5e       | 1.97 | 2.36E-08 | 1.77E-06 |
| 17255387 | Slc35b1    | 1.96 | 4.87E-09 | 5.92E-07 |
| 17437803 | N4bp2      | 1.96 | 8.07E-08 | 4.50E-06 |
| 17491941 | Aldh1a3    | 1.96 | 1.68E-08 | 1.43E-06 |
| 17356490 | Rela       | 1.96 | 1.34E-08 | 1.21E-06 |
| 17483048 | Apobr      | 1.96 | 4.68E-05 | 6.22E-04 |
| 17320189 | Alg12      | 1.96 | 1.71E-06 | 4.74E-05 |
| 17251527 | Per1       | 1.96 | 1.73E-07 | 8.24E-06 |
| 17326428 | Cpox       | 1.96 | 4.60E-07 | 1.75E-05 |
| 17266911 | Mmp28      | 1.96 | 3.47E-05 | 4.96E-04 |
| 17474974 | Plaur      | 1.96 | 7.22E-09 | 7.58E-07 |
| 17356356 | Rin1       | 1.95 | 1.02E-06 | 3.16E-05 |
| 17255232 | Lrrc59     | 1.95 | 5.33E-09 | 6.26E-07 |
| 17538171 | Mid2       | 1.95 | 2.77E-06 | 6.80E-05 |
| 17267393 | Dhx40      | 1.95 | 8.19E-07 | 2.65E-05 |
| 17426944 | Fam154a    | 1.95 | 3.21E-06 | 7.62E-05 |
| 17326527 | Cggbp1     | 1.95 | 2.67E-07 | 1.17E-05 |
| 17377753 | H13        | 1.94 | 1.37E-08 | 1.22E-06 |
| 17220548 | Eprs       | 1.94 | 1.51E-08 | 1.30E-06 |
| 17327830 | Fam100a    | 1.93 | 1.55E-04 | 1.61E-03 |
| 17358214 | Klf9       | 1.93 | 1.25E-07 | 6.50E-06 |
| 17384457 | Stom       | 1.92 | 1.70E-08 | 1.43E-06 |
| 17411751 | Trp53inp1  | 1.92 | 6.45E-08 | 3.84E-06 |
| 17437213 | Cd38       | 1.92 | 5.32E-08 | 3.29E-06 |
| 17285559 | Elmo1      | 1.91 | 5.46E-06 | 1.17E-04 |
| 17482041 | Calcb      | 1.91 | 3.35E-04 | 2.90E-03 |
| 17531701 | Gm20317    | 1.91 | 3.84E-04 | 3.22E-03 |
| 17464128 | Golt1b     | 1.91 | 2.07E-08 | 1.63E-06 |
| 17355092 | Lman1      | 1.91 | 4.91E-08 | 3.12E-06 |
| 17496345 | Nupr1      | 1.90 | 3.05E-08 | 2.19E-06 |
| 17268066 | Gm11545    | 1.90 | 8.09E-07 | 2.63E-05 |
| 17285204 | Ero1lb     | 1.90 | 6.49E-06 | 1.32E-04 |
| 17292891 | Pdlim7     | 1.90 | 1.39E-07 | 6.94E-06 |



|          |               |      |          |          |
|----------|---------------|------|----------|----------|
| 17351414 | Pmaip1        | 1.90 | 1.69E-07 | 8.08E-06 |
| 17230102 | Ifi202b       | 1.90 | 1.83E-04 | 1.82E-03 |
| 17318070 | 2010109I03Rik | 1.89 | 1.21E-08 | 1.13E-06 |
| 17260869 | Slc1a4        | 1.89 | 1.25E-06 | 3.69E-05 |
| 17497687 | Bet1l         | 1.89 | 4.33E-07 | 1.69E-05 |
| 17228624 | Rasal2        | 1.89 | 3.98E-06 | 9.01E-05 |
| 17512088 | Slc38a7       | 1.88 | 3.63E-05 | 5.11E-04 |
| 17410204 | Alpk1         | 1.88 | 4.86E-06 | 1.06E-04 |
| 17458682 | Creb5         | 1.88 | 6.70E-06 | 1.35E-04 |
| 17275351 | Scfd1         | 1.88 | 2.40E-06 | 6.06E-05 |
| 17475523 | BC024978      | 1.88 | 1.12E-05 | 2.04E-04 |
| 17476199 | Zfp790        | 1.88 | 1.46E-05 | 2.52E-04 |
| 17504074 | Cpne2         | 1.88 | 1.92E-08 | 1.54E-06 |
| 17528405 | Rab8b         | 1.88 | 6.88E-05 | 8.35E-04 |
| 17521603 | Gmppb         | 1.88 | 3.32E-07 | 1.38E-05 |
| 17354004 | Yipf5         | 1.88 | 5.14E-08 | 3.21E-06 |
| 17242785 | Sbno2         | 1.87 | 2.31E-07 | 1.04E-05 |
| 17433265 | Car6          | 1.87 | 3.59E-05 | 5.07E-04 |
| 17350356 | Eif1a         | 1.87 | 9.99E-09 | 9.82E-07 |
| 17519875 | Mei4          | 1.87 | 4.57E-05 | 6.12E-04 |
| 17410617 | Dapp1         | 1.87 | 4.38E-05 | 5.94E-04 |
| 17399883 | Sprr2h        | 1.87 | 6.43E-04 | 4.85E-03 |
| 17391997 | Gpcpd1        | 1.87 | 8.13E-08 | 4.52E-06 |
| 17500523 | Tmem66        | 1.87 | 1.41E-07 | 6.94E-06 |
| 17397663 | Spg20         | 1.86 | 1.35E-05 | 2.37E-04 |
| 17243617 | Ckap4         | 1.86 | 9.86E-08 | 5.28E-06 |
| 17265748 | Aspa          | 1.86 | 7.06E-06 | 1.39E-04 |
| 17507321 | Efnb2         | 1.86 | 5.15E-08 | 3.21E-06 |
| 17298312 | Glt8d1        | 1.86 | 6.24E-06 | 1.29E-04 |
| 17334365 | Zfp598        | 1.86 | 6.53E-08 | 3.87E-06 |
| 17499962 | Plat          | 1.86 | 1.38E-06 | 4.01E-05 |
| 17300396 | Ngdn          | 1.86 | 1.27E-06 | 3.74E-05 |
| 17248196 | Asb3          | 1.86 | 3.61E-05 | 5.10E-04 |
| 17345613 | Ubr2          | 1.85 | 1.82E-06 | 4.94E-05 |
| 17511183 | Calr          | 1.85 | 1.51E-08 | 1.30E-06 |
| 17306906 | Ripk3         | 1.85 | 4.44E-08 | 2.92E-06 |
| 17278073 | Golga5        | 1.85 | 4.15E-06 | 9.39E-05 |
| 17277270 | Lin52         | 1.85 | 6.78E-04 | 5.03E-03 |
| 17246163 | Esyt1         | 1.85 | 9.39E-06 | 1.75E-04 |
| 17409328 | Sars          | 1.85 | 2.24E-08 | 1.72E-06 |
| 17383013 | Sec16a        | 1.85 | 1.58E-07 | 7.68E-06 |
| 17365863 | A630007B06Rik | 1.85 | 2.97E-07 | 1.27E-05 |
| 17410880 | Clca4         | 1.84 | 3.87E-08 | 2.67E-06 |
| 17480018 | Ctsc          | 1.84 | 4.48E-08 | 2.93E-06 |
| 17241032 | Ddit4         | 1.84 | 2.36E-05 | 3.69E-04 |

|          |               |      |          |          |
|----------|---------------|------|----------|----------|
| 17399386 | Krtcap2       | 1.84 | 3.38E-07 | 1.40E-05 |
| 17505762 | Zfp1          | 1.84 | 5.63E-05 | 7.14E-04 |
| 17447803 | Fbxl5         | 1.84 | 1.90E-06 | 5.12E-05 |
| 17346210 | Ticam1        | 1.83 | 2.28E-07 | 1.03E-05 |
| 17261425 | Stc2          | 1.83 | 4.53E-06 | 1.01E-04 |
| 17306396 | Jub           | 1.83 | 1.48E-05 | 2.55E-04 |
| 17428032 | Zyg11b        | 1.83 | 4.44E-07 | 1.71E-05 |
| 17439622 | Agpat9        | 1.82 | 1.55E-07 | 7.59E-06 |
| 17246967 | Xbp1          | 1.82 | 6.03E-08 | 3.64E-06 |
| 17511112 | Ccdc130       | 1.82 | 2.81E-05 | 4.22E-04 |
| 17259026 | Card14        | 1.82 | 1.76E-06 | 4.83E-05 |
| 17229948 | Dusp23        | 1.81 | 1.41E-06 | 4.06E-05 |
| 17325109 | Itgb5         | 1.81 | 2.60E-06 | 6.44E-05 |
| 17347163 | Xdh           | 1.81 | 2.34E-06 | 5.95E-05 |
| 17330058 | Pdia5         | 1.81 | 1.86E-05 | 3.06E-04 |
| 17397968 | Arhgef26      | 1.81 | 4.42E-07 | 1.70E-05 |
| 17461677 | Jagn1         | 1.81 | 1.67E-05 | 2.81E-04 |
| 17425151 | Alg2          | 1.81 | 3.22E-07 | 1.35E-05 |
| 17383216 | Slc2a6        | 1.81 | 8.44E-04 | 6.01E-03 |
| 17446775 | Preb          | 1.80 | 1.79E-05 | 2.97E-04 |
| 17483733 | Bag3          | 1.80 | 2.45E-08 | 1.81E-06 |
| 17477897 | Bcat2         | 1.80 | 3.51E-08 | 2.47E-06 |
| 17254295 | Expi          | 1.80 | 2.77E-05 | 4.18E-04 |
| 17509282 | Cdkn2aip      | 1.80 | 1.12E-07 | 5.90E-06 |
| 17221792 | Fam135a       | 1.80 | 3.11E-07 | 1.31E-05 |
| 17471324 | Itfg2         | 1.79 | 9.69E-06 | 1.80E-04 |
| 17384753 | Golga1        | 1.79 | 3.77E-07 | 1.52E-05 |
| 17516546 | Dpagt1        | 1.79 | 9.28E-08 | 5.00E-06 |
| 17282664 | Pgf           | 1.79 | 1.09E-04 | 1.21E-03 |
| 17395777 | Ptk6          | 1.79 | 4.53E-04 | 3.68E-03 |
| 17250744 | Snord65       | 1.79 | 1.51E-04 | 1.58E-03 |
| 17358797 | Fas           | 1.79 | 1.78E-04 | 1.78E-03 |
| 17510114 | Gdf15         | 1.79 | 1.50E-05 | 2.58E-04 |
| 17384578 | Pdcl          | 1.79 | 3.27E-06 | 7.71E-05 |
| 17390810 | Gatm          | 1.79 | 5.75E-04 | 4.43E-03 |
| 17370596 | Gm19922       | 1.79 | 4.86E-05 | 6.38E-04 |
| 17351141 | 1500015A07Rik | 1.79 | 6.86E-06 | 1.36E-04 |
| 17468730 | Sec61a1       | 1.79 | 7.79E-08 | 4.44E-06 |
| 17250734 | 2410006H16Rik | 1.78 | 8.40E-08 | 4.63E-06 |
| 17230111 | Ifi205        | 1.78 | 7.04E-06 | 1.38E-04 |
| 17270567 | Gosr2         | 1.78 | 1.04E-06 | 3.19E-05 |
| 17351681 | Mex3c         | 1.78 | 2.01E-07 | 9.33E-06 |
| 17461554 | Mtmr14        | 1.78 | 7.20E-07 | 2.44E-05 |
| 17525075 | Herpud2       | 1.78 | 5.08E-07 | 1.88E-05 |
| 17414416 | Dnajc25       | 1.78 | 3.49E-05 | 4.97E-04 |

|          |               |      |          |          |
|----------|---------------|------|----------|----------|
| 17300591 | Irf9          | 1.78 | 2.37E-05 | 3.70E-04 |
| 17523852 | Birc2         | 1.78 | 3.95E-06 | 8.97E-05 |
| 17427312 | Jun           | 1.78 | 3.17E-05 | 4.63E-04 |
| 17212138 | Map4k4        | 1.77 | 7.13E-07 | 2.43E-05 |
| 17400966 | Gdap2         | 1.77 | 2.50E-06 | 6.25E-05 |
| 17329433 | Bcl6          | 1.77 | 9.20E-07 | 2.91E-05 |
| 17229166 | Blzf1         | 1.77 | 3.68E-06 | 8.47E-05 |
| 17515886 | Srpr          | 1.77 | 2.26E-07 | 1.03E-05 |
| 17523095 | Exog          | 1.77 | 9.95E-05 | 1.13E-03 |
| 17336725 | Dom3z         | 1.77 | 7.59E-07 | 2.53E-05 |
| 17275882 | Mgat2         | 1.77 | 3.75E-06 | 8.59E-05 |
| 17357126 | Snhg1         | 1.77 | 6.36E-06 | 1.30E-04 |
| 17317046 | Tnfrsf11b     | 1.76 | 1.29E-07 | 6.61E-06 |
| 17268380 | Cdk5rap3      | 1.76 | 2.24E-05 | 3.53E-04 |
| 17449585 | Btc           | 1.76 | 7.01E-06 | 1.38E-04 |
| 17359520 | Pi4k2a        | 1.76 | 1.01E-04 | 1.15E-03 |
| 17410845 | Clca1         | 1.76 | 3.57E-04 | 3.05E-03 |
| 17430576 | Tinagl1       | 1.76 | 6.57E-07 | 2.29E-05 |
| 17273240 | Pycr1         | 1.76 | 2.08E-05 | 3.33E-04 |
| 17305813 | Atg14         | 1.76 | 9.64E-06 | 1.80E-04 |
| 17418540 | Stk40         | 1.75 | 1.74E-06 | 4.80E-05 |
| 17418357 | Yrdc          | 1.75 | 6.93E-05 | 8.41E-04 |
| 17426348 | Tnfsf15       | 1.75 | 6.24E-04 | 4.72E-03 |
| 17473765 | Zfp110        | 1.75 | 4.33E-05 | 5.89E-04 |
| 17400799 | Sec22b        | 1.75 | 6.32E-06 | 1.30E-04 |
| 17244476 | Cradd         | 1.75 | 8.78E-06 | 1.65E-04 |
| 17445426 | Steap2        | 1.75 | 4.87E-06 | 1.06E-04 |
| 17406031 | Rapgef2       | 1.75 | 7.36E-06 | 1.43E-04 |
| 17405414 | Serp1         | 1.75 | 5.78E-07 | 2.06E-05 |
| 17405667 | Ssr3          | 1.74 | 2.49E-06 | 6.24E-05 |
| 17439029 | Areg          | 1.74 | 4.03E-08 | 2.76E-06 |
| 17349582 | 1700066B19Rik | 1.74 | 3.86E-05 | 5.38E-04 |
| 17339889 | Fam82a1       | 1.74 | 3.25E-04 | 2.84E-03 |
| 17247389 | Egfr          | 1.74 | 2.37E-07 | 1.06E-05 |
| 17212947 | Spats2l       | 1.74 | 1.60E-06 | 4.52E-05 |
| 17261575 | Ranbp17       | 1.74 | 2.81E-04 | 2.55E-03 |
| 17353420 | Fam13b        | 1.74 | 1.20E-07 | 6.30E-06 |
| 17316690 | Klf10         | 1.74 | 1.20E-05 | 2.15E-04 |
| 17447218 | Mxd4          | 1.74 | 1.93E-04 | 1.90E-03 |
| 17533498 | Kdm6a         | 1.74 | 5.87E-06 | 1.22E-04 |
| 17243738 | Hsp90b1       | 1.74 | 2.45E-07 | 1.08E-05 |
| 17439830 | Spp1          | 1.74 | 1.23E-04 | 1.33E-03 |
| 17413649 | Dcaf10        | 1.74 | 5.66E-06 | 1.20E-04 |
| 17431152 | Dhdds         | 1.74 | 3.13E-06 | 7.47E-05 |
| 17308686 | Cog3          | 1.73 | 5.66E-07 | 2.03E-05 |

|          |               |      |          |          |
|----------|---------------|------|----------|----------|
| 17434023 | lsg15         | 1.73 | 4.98E-04 | 3.95E-03 |
| 17292450 | Fgd3          | 1.73 | 1.08E-04 | 1.20E-03 |
| 17469446 | Eif4e3        | 1.73 | 2.02E-04 | 1.98E-03 |
| 17491276 | Spty2d1       | 1.73 | 1.27E-05 | 2.25E-04 |
| 17529449 | 4922501C03Rik | 1.73 | 1.32E-05 | 2.32E-04 |
| 17250178 | Hist3h2a      | 1.73 | 6.50E-04 | 4.88E-03 |
| 17252341 | Xaf1          | 1.73 | 2.98E-05 | 4.42E-04 |
| 17480030 | Rab38         | 1.73 | 8.31E-04 | 5.93E-03 |
| 17371201 | Gca           | 1.73 | 2.76E-04 | 2.52E-03 |
| 17370691 | Lypd6b        | 1.72 | 4.84E-05 | 6.37E-04 |
| 17429632 | Mfsd2a        | 1.72 | 7.83E-07 | 2.57E-05 |
| 17531238 | Arih2         | 1.72 | 5.07E-07 | 1.88E-05 |
| 17460451 | 1600020E01Rik | 1.72 | 3.75E-04 | 3.17E-03 |
| 17235320 | Reep6         | 1.72 | 1.11E-06 | 3.35E-05 |
| 17260349 | Tmed4         | 1.71 | 3.73E-06 | 8.55E-05 |
| 17314260 | Lrrk2         | 1.71 | 1.63E-05 | 2.77E-04 |
| 17525803 | Gramd1b       | 1.71 | 2.34E-05 | 3.67E-04 |
| 17243644 | Cry1          | 1.71 | 5.02E-06 | 1.09E-04 |
| 17443015 | 0610007L01Rik | 1.71 | 2.03E-07 | 9.40E-06 |
| 17231003 | Mfsd7b        | 1.71 | 1.38E-05 | 2.40E-04 |
| 17307550 | Ints6         | 1.71 | 5.40E-07 | 1.98E-05 |
| 17281354 | Sec23a        | 1.71 | 2.28E-07 | 1.03E-05 |
| 17370641 | Epc2          | 1.71 | 4.36E-07 | 1.69E-05 |
| 17326747 | 1700066C05Rik | 1.71 | 1.41E-03 | 9.05E-03 |
| 17492289 | Det1          | 1.71 | 3.15E-05 | 4.60E-04 |
| 17337497 | Zfp57         | 1.71 | 6.63E-05 | 8.11E-04 |
| 17259794 | Rnf185        | 1.70 | 6.80E-06 | 1.36E-04 |
| 17508691 | Rbpms         | 1.70 | 1.94E-06 | 5.16E-05 |
| 17270888 | Ern1          | 1.70 | 2.41E-07 | 1.07E-05 |
| 17349393 | Srp19         | 1.70 | 9.08E-07 | 2.89E-05 |
| 17419020 | Marcks1       | 1.70 | 9.40E-05 | 1.08E-03 |
| 17337481 | Rnf39         | 1.70 | 1.97E-05 | 3.19E-04 |
| 17395053 | LOC100862165  | 1.70 | 1.22E-04 | 1.33E-03 |
| 17496664 | Zfp747        | 1.70 | 9.59E-05 | 1.10E-03 |
| 17292839 | Lman2         | 1.70 | 3.19E-07 | 1.34E-05 |
| 17272287 | Srp68         | 1.70 | 1.71E-07 | 8.17E-06 |
| 17393336 | Edem2         | 1.70 | 3.00E-07 | 1.28E-05 |
| 17307709 | Hmbox1        | 1.70 | 1.92E-06 | 5.16E-05 |
| 17441540 | Med13l        | 1.70 | 9.70E-07 | 3.03E-05 |
| 17421694 | Srm           | 1.70 | 3.48E-06 | 8.10E-05 |
| 17391888 | Rnf24         | 1.69 | 3.85E-05 | 5.38E-04 |
| 17223880 | Kansl1l       | 1.69 | 1.67E-04 | 1.70E-03 |
| 17246091 | Il23a         | 1.69 | 1.01E-03 | 6.98E-03 |
| 17217610 | Csrp1         | 1.68 | 3.27E-06 | 7.71E-05 |
| 17214543 | Gmppa         | 1.68 | 3.48E-05 | 4.96E-04 |

|          |               |      |          |          |
|----------|---------------|------|----------|----------|
| 17439045 | Thap6         | 1.68 | 8.53E-05 | 1.00E-03 |
| 17470060 | Rassf4        | 1.68 | 1.08E-03 | 7.37E-03 |
| 17385654 | Itgb6         | 1.68 | 1.12E-06 | 3.36E-05 |
| 17291803 | 1300014I06Rik | 1.68 | 1.85E-06 | 5.03E-05 |
| 17265451 | Derl2         | 1.68 | 1.15E-06 | 3.43E-05 |
| 17420016 | Id3           | 1.68 | 2.48E-05 | 3.81E-04 |
| 17443166 | Stx1a         | 1.68 | 2.99E-05 | 4.43E-04 |
| 17319364 | D730005E14Rik | 1.68 | 1.49E-05 | 2.56E-04 |
| 17219546 | Slamf9        | 1.68 | 2.43E-05 | 3.76E-04 |
| 17289889 | Il6st         | 1.68 | 9.86E-06 | 1.82E-04 |
| 17287707 | Tmed9         | 1.68 | 4.36E-06 | 9.77E-05 |
| 17476247 | Zfp568        | 1.68 | 4.70E-06 | 1.04E-04 |
| 17479875 | Stard5        | 1.68 | 3.13E-06 | 7.47E-05 |
| 17453347 | Gtf2ird1      | 1.68 | 1.76E-05 | 2.93E-04 |
| 17283445 | Lgmn          | 1.68 | 6.78E-05 | 8.25E-04 |
| 17464367 | Ppfibp1       | 1.68 | 3.43E-06 | 8.02E-05 |
| 17237876 | Mettl1        | 1.67 | 1.04E-05 | 1.91E-04 |
| 17264102 | Hs3st3b1      | 1.67 | 6.41E-06 | 1.31E-04 |
| 17355366 | Smad4         | 1.67 | 5.18E-07 | 1.91E-05 |
| 17388599 | Ttc17         | 1.67 | 4.32E-06 | 9.71E-05 |
| 17232731 | Rnu3a         | 1.67 | 3.50E-04 | 3.00E-03 |
| 17331365 | Arl13b        | 1.67 | 6.91E-06 | 1.37E-04 |
| 17435422 | Nub1          | 1.67 | 7.41E-06 | 1.44E-04 |
| 17361090 | BC021614      | 1.67 | 3.85E-06 | 8.75E-05 |
| 17329350 | Tbccd1        | 1.66 | 2.79E-06 | 6.85E-05 |
| 17439922 | Lrrc8d        | 1.66 | 1.47E-05 | 2.54E-04 |
| 17254249 | Taf15         | 1.66 | 3.60E-07 | 1.46E-05 |
| 17442203 | Setd1b        | 1.66 | 6.78E-07 | 2.34E-05 |
| 17484601 | 1190003J15Rik | 1.66 | 1.22E-05 | 2.18E-04 |
| 17460918 | Tmem43        | 1.66 | 1.66E-04 | 1.69E-03 |
| 17450727 | Tmed5         | 1.66 | 1.37E-07 | 6.89E-06 |
| 17359608 | Entpd7        | 1.66 | 1.66E-05 | 2.80E-04 |
| 17218209 | Edem3         | 1.66 | 1.06E-06 | 3.22E-05 |
| 17235890 | Hcfc2         | 1.66 | 2.35E-05 | 3.68E-04 |
| 17311652 | Wdr67         | 1.66 | 1.38E-03 | 8.92E-03 |
| 17285859 | Hist1h1c      | 1.66 | 4.81E-05 | 6.34E-04 |
| 17279230 | Zfyve21       | 1.66 | 1.26E-06 | 3.72E-05 |
| 17295482 | Mtap1b        | 1.66 | 5.95E-06 | 1.24E-04 |
| 17412552 | Ube2j1        | 1.66 | 1.28E-07 | 6.60E-06 |
| 17290949 | Zfp187        | 1.66 | 5.70E-04 | 4.40E-03 |
| 17329298 | Etv5          | 1.65 | 7.84E-05 | 9.34E-04 |
| 17525379 | Fam118b       | 1.65 | 1.32E-04 | 1.41E-03 |
| 17331044 | Tfg           | 1.65 | 1.26E-07 | 6.50E-06 |
| 17280577 | Hbp1          | 1.65 | 4.40E-06 | 9.81E-05 |
| 17366597 | Usp6nl        | 1.65 | 5.22E-07 | 1.92E-05 |

|          |               |      |          |          |
|----------|---------------|------|----------|----------|
| 17328978 | Cdc45         | 1.65 | 7.62E-06 | 1.47E-04 |
| 17320583 | Cpne8         | 1.65 | 5.19E-05 | 6.68E-04 |
| 17413369 | Creb3         | 1.65 | 3.30E-06 | 7.77E-05 |
| 17487457 | Bcl3          | 1.65 | 3.17E-07 | 1.33E-05 |
| 17264424 | Ndel1         | 1.65 | 8.20E-06 | 1.56E-04 |
| 17342065 | Mapk8ip3      | 1.65 | 5.47E-05 | 7.00E-04 |
| 17291937 | Txndc5        | 1.65 | 5.77E-07 | 2.06E-05 |
| 17307425 | LOC100862065  | 1.65 | 1.18E-03 | 7.91E-03 |
| 17294167 | BC018507      | 1.64 | 6.64E-05 | 8.11E-04 |
| 17483842 | Tacc2         | 1.64 | 9.13E-07 | 2.89E-05 |
| 17346679 | Pja2          | 1.64 | 1.75E-06 | 4.82E-05 |
| 17313050 | Apobec3       | 1.64 | 7.21E-06 | 1.40E-04 |
| 17445394 | A330021E22Rik | 1.64 | 6.94E-05 | 8.41E-04 |
| 17430487 | Txlna         | 1.64 | 2.24E-05 | 3.53E-04 |
| 17511130 | Ier2          | 1.64 | 3.70E-05 | 5.20E-04 |
| 17216087 | Ing5          | 1.64 | 3.10E-06 | 7.43E-05 |
| 17510885 | Elmod2        | 1.64 | 8.45E-07 | 2.72E-05 |
| 17518500 | Parp16        | 1.64 | 4.99E-05 | 6.50E-04 |
| 17437302 | Slit2         | 1.63 | 1.83E-04 | 1.83E-03 |
| 17371661 | Gorasp2       | 1.63 | 5.80E-07 | 2.06E-05 |
| 17452405 | Atp2a2        | 1.63 | 3.04E-07 | 1.29E-05 |
| 17419553 | Map3k6        | 1.63 | 3.69E-05 | 5.18E-04 |
| 17274868 | 2010109K11Rik | 1.63 | 6.82E-06 | 1.36E-04 |
| 17488470 | Samd4b        | 1.63 | 1.85E-05 | 3.05E-04 |
| 17363470 | Gda           | 1.63 | 4.63E-07 | 1.75E-05 |
| 17543396 | Eda2r         | 1.63 | 3.02E-04 | 2.69E-03 |
| 17335540 | Pim1          | 1.62 | 1.34E-04 | 1.43E-03 |
| 17330870 | Gm4827        | 1.62 | 1.16E-05 | 2.09E-04 |
| 17388999 | Prrg4         | 1.62 | 4.36E-06 | 9.77E-05 |
| 17246679 | Slc35e4       | 1.62 | 3.68E-06 | 8.47E-05 |
| 17392333 | Rrbp1         | 1.62 | 7.21E-07 | 2.44E-05 |
| 17443350 | Ywhag         | 1.62 | 4.57E-06 | 1.01E-04 |
| 17451748 | Ccdc64        | 1.62 | 3.52E-05 | 5.00E-04 |
| 17233736 | Sar1a         | 1.62 | 4.52E-07 | 1.73E-05 |
| 17301849 | Fndc3a        | 1.62 | 1.40E-06 | 4.05E-05 |
| 17297595 | Myst4         | 1.61 | 2.45E-04 | 2.29E-03 |
| 17361833 | Dpf2          | 1.61 | 9.82E-07 | 3.06E-05 |
| 17393501 | Rbm39         | 1.61 | 7.84E-07 | 2.57E-05 |
| 17534909 | Ddx26b        | 1.61 | 4.99E-05 | 6.50E-04 |
| 17438062 | Nipal1        | 1.61 | 4.75E-07 | 1.79E-05 |
| 17479183 | Fam174b       | 1.61 | 1.40E-06 | 4.05E-05 |
| 17276153 | Daam1         | 1.61 | 1.93E-06 | 5.16E-05 |
| 17368456 | Cacfd1        | 1.61 | 2.18E-06 | 5.66E-05 |
| 17419041 | LOC100861795  | 1.61 | 3.27E-05 | 4.74E-04 |
| 17231801 | Reps1         | 1.61 | 1.00E-06 | 3.11E-05 |

|          |               |      |          |          |
|----------|---------------|------|----------|----------|
| 17480349 | Kctd14        | 1.60 | 1.28E-04 | 1.38E-03 |
| 17376510 | Smox          | 1.60 | 4.47E-05 | 6.02E-04 |
| 17492314 | Mfge8         | 1.60 | 1.94E-05 | 3.16E-04 |
| 17317167 | Has2          | 1.60 | 1.07E-03 | 7.32E-03 |
| 17409075 | Csf1          | 1.60 | 3.91E-04 | 3.26E-03 |
| 17301558 | Kctd9         | 1.60 | 1.05E-05 | 1.92E-04 |
| 17544939 | Tsc22d3       | 1.60 | 3.74E-04 | 3.17E-03 |
| 17425160 | Erp44         | 1.60 | 5.88E-07 | 2.08E-05 |
| 17473410 | Zfp628        | 1.60 | 3.46E-04 | 2.98E-03 |
| 17531176 | Tcta          | 1.60 | 2.37E-05 | 3.70E-04 |
| 17355298 | 2310002L13Rik | 1.59 | 4.80E-06 | 1.06E-04 |
| 17342943 | 4930539E08Rik | 1.59 | 2.75E-05 | 4.15E-04 |
| 17330080 | Dirc2         | 1.59 | 3.02E-06 | 7.30E-05 |
| 17226771 | lkbke         | 1.59 | 8.96E-05 | 1.04E-03 |
| 17445525 | Rundc3b       | 1.59 | 8.81E-05 | 1.03E-03 |
| 17472598 | 5730419I09Rik | 1.59 | 1.97E-05 | 3.19E-04 |
| 17325410 | Golgb1        | 1.59 | 7.45E-05 | 8.93E-04 |
| 17401514 | 4933421E11Rik | 1.59 | 6.65E-06 | 1.34E-04 |
| 17479834 | Mex3b         | 1.59 | 8.61E-05 | 1.01E-03 |
| 17355009 | Nars          | 1.59 | 7.65E-07 | 2.53E-05 |
| 17322128 | Spryd3        | 1.59 | 8.60E-06 | 1.62E-04 |
| 17222106 | Uggt1         | 1.59 | 6.84E-06 | 1.36E-04 |
| 17543529 | Slc7a3        | 1.59 | 6.13E-04 | 4.66E-03 |
| 17317015 | Ext1          | 1.59 | 4.47E-07 | 1.71E-05 |
| 17431820 | Pla2g5        | 1.59 | 2.22E-04 | 2.13E-03 |
| 17276328 | Hif1a         | 1.59 | 6.02E-07 | 2.13E-05 |
| 17448863 | Scfd2         | 1.58 | 1.12E-03 | 7.54E-03 |
| 17405591 | Slc33a1       | 1.58 | 1.98E-05 | 3.20E-04 |
| 17359925 | Gbf1          | 1.58 | 6.59E-06 | 1.34E-04 |
| 17497044 | lkzf5         | 1.58 | 1.24E-04 | 1.34E-03 |
| 17228349 | ler5          | 1.58 | 1.26E-05 | 2.23E-04 |
| 17406962 | Trim46        | 1.58 | 9.75E-04 | 6.77E-03 |
| 17233457 | Ranbp2        | 1.58 | 1.03E-05 | 1.89E-04 |
| 17244913 | Zdhhc17       | 1.58 | 4.18E-05 | 5.73E-04 |
| 17371059 | Mar-07        | 1.58 | 5.10E-05 | 6.58E-04 |
| 17449596 | Rchy1         | 1.57 | 4.78E-06 | 1.05E-04 |
| 17342708 | Lemd2         | 1.57 | 1.42E-04 | 1.49E-03 |
| 17472847 | 4933424B01Rik | 1.57 | 6.80E-05 | 8.27E-04 |
| 17432426 | Prdm2         | 1.57 | 6.67E-04 | 4.97E-03 |
| 17399432 | Shc1          | 1.57 | 1.78E-06 | 4.85E-05 |
| 17532472 | Cdcp1         | 1.57 | 7.69E-06 | 1.48E-04 |
| 17243525 | Slc41a2       | 1.57 | 5.61E-05 | 7.14E-04 |
| 17343119 | Btbd9         | 1.57 | 1.39E-04 | 1.47E-03 |
| 17485826 | Ptprh         | 1.57 | 2.98E-05 | 4.42E-04 |
| 17431496 | Pnrc2         | 1.57 | 1.52E-06 | 4.33E-05 |

|          |               |      |          |          |
|----------|---------------|------|----------|----------|
| 17294974 | Papd4         | 1.57 | 3.93E-06 | 8.94E-05 |
| 17505851 | Nudt7         | 1.57 | 2.19E-05 | 3.47E-04 |
| 17251799 | Gps2          | 1.56 | 1.87E-06 | 5.04E-05 |
| 17294991 | Jmy           | 1.56 | 3.18E-04 | 2.79E-03 |
| 17474956 | 1500002O20Rik | 1.56 | 5.85E-06 | 1.22E-04 |
| 17532137 | Myd88         | 1.56 | 7.60E-05 | 9.09E-04 |
| 17399104 | Ssr2          | 1.56 | 5.08E-07 | 1.88E-05 |
| 17260167 | Ccdc117       | 1.56 | 1.07E-05 | 1.95E-04 |
| 17416336 | Ttc22         | 1.56 | 2.74E-05 | 4.15E-04 |
| 17354857 | Adrb2         | 1.56 | 1.35E-04 | 1.43E-03 |
| 17447289 | Nop14         | 1.56 | 4.37E-07 | 1.69E-05 |
| 17342101 | Hn1l          | 1.56 | 2.50E-06 | 6.25E-05 |
| 17409376 | Scarna2       | 1.56 | 1.16E-03 | 7.80E-03 |
| 17407116 | Cks1b         | 1.56 | 2.94E-04 | 2.64E-03 |
| 17334192 | Prss27        | 1.56 | 4.10E-04 | 3.38E-03 |
| 17452713 | Vps37b        | 1.55 | 3.04E-04 | 2.70E-03 |
| 17249593 | Irf1          | 1.55 | 9.36E-06 | 1.75E-04 |
| 17409379 | Tmem167b      | 1.55 | 1.70E-05 | 2.85E-04 |
| 17222001 | Prim2         | 1.55 | 1.43E-05 | 2.49E-04 |
| 17295770 | Slc30a5       | 1.55 | 1.38E-04 | 1.46E-03 |
| 17420546 | Pla2g2e       | 1.55 | 4.15E-04 | 3.42E-03 |
| 17490924 | Sphk2         | 1.55 | 8.56E-06 | 1.61E-04 |
| 17225472 | Zfp330        | 1.55 | 3.51E-07 | 1.44E-05 |
| 17402746 | Ints12        | 1.55 | 2.86E-05 | 4.28E-04 |
| 17521825 | Qrich1        | 1.55 | 1.60E-06 | 4.52E-05 |
| 17359967 | Nfkb2         | 1.55 | 1.14E-05 | 2.07E-04 |
| 17343768 | Brd2          | 1.55 | 1.50E-06 | 4.28E-05 |
| 17258887 | Pgs1          | 1.55 | 7.33E-05 | 8.81E-04 |
| 17304246 | Appl1         | 1.55 | 1.86E-06 | 5.03E-05 |
| 17339549 | Ypel5         | 1.55 | 1.10E-06 | 3.35E-05 |
| 17422907 | 2310042D19Rik | 1.55 | 2.52E-04 | 2.34E-03 |
| 17543974 | Magt1         | 1.55 | 4.65E-06 | 1.03E-04 |
| 17241582 | Sirt1         | 1.54 | 6.74E-04 | 5.01E-03 |
| 17469541 | Ilsra         | 1.54 | 1.99E-05 | 3.21E-04 |
| 17271259 | Wipi1         | 1.54 | 3.77E-05 | 5.27E-04 |
| 17462998 | Zfp384        | 1.54 | 1.31E-05 | 2.30E-04 |
| 17437129 | Cpeb2         | 1.54 | 4.19E-05 | 5.73E-04 |
| 17502874 | Tbc1d9        | 1.54 | 6.18E-06 | 1.28E-04 |
| 17461725 | Creld1        | 1.54 | 2.58E-04 | 2.39E-03 |
| 17487500 | 2210010C17Rik | 1.54 | 3.72E-05 | 5.22E-04 |
| 17224617 | LOC100862164  | 1.54 | 2.85E-06 | 6.97E-05 |
| 17449578 | Gm19619       | 1.54 | 1.12E-03 | 7.56E-03 |
| 17484627 | Ric8          | 1.54 | 1.59E-06 | 4.49E-05 |
| 17464503 | 2810474O19Rik | 1.54 | 1.14E-05 | 2.06E-04 |
| 17537756 | Armcx3        | 1.54 | 2.09E-05 | 3.34E-04 |



|          |               |      |          |          |
|----------|---------------|------|----------|----------|
| 17339142 | Ppp4r1        | 1.53 | 1.92E-06 | 5.15E-05 |
| 17332228 | Rcan1         | 1.53 | 4.96E-05 | 6.47E-04 |
| 17453832 | Trim56        | 1.53 | 7.83E-06 | 1.50E-04 |
| 17364932 | Got1          | 1.53 | 3.45E-06 | 8.04E-05 |
| 17358962 | Btaf1         | 1.53 | 6.16E-05 | 7.67E-04 |
| 17357150 | Wdr74         | 1.53 | 6.44E-05 | 7.94E-04 |
| 17407578 | Tuft1         | 1.53 | 6.53E-05 | 8.02E-04 |
| 17497091 | Oat           | 1.53 | 1.15E-05 | 2.08E-04 |
| 17443901 | Fam20c        | 1.53 | 1.52E-03 | 9.68E-03 |
| 17390433 | Zscan29       | 1.53 | 1.83E-05 | 3.02E-04 |
| 17327465 | Ets2          | 1.53 | 5.49E-06 | 1.17E-04 |
| 17258220 | Slc16a5       | 1.53 | 3.02E-04 | 2.69E-03 |
| 17344021 | Stk19         | 1.53 | 3.48E-04 | 2.99E-03 |
| 17343387 | Akap8l        | 1.53 | 6.45E-05 | 7.94E-04 |
| 17289794 | Plk2          | 1.53 | 8.23E-06 | 1.57E-04 |
| 17238162 | Rdh9          | 1.53 | 2.51E-04 | 2.33E-03 |
| 17273165 | P4hb          | 1.53 | 1.00E-06 | 3.11E-05 |
| 17525524 | Stt3a         | 1.53 | 7.28E-07 | 2.45E-05 |
| 17459634 | Ggcx          | 1.52 | 1.03E-04 | 1.16E-03 |
| 17444364 | 2810453106Rik | 1.52 | 1.34E-03 | 8.72E-03 |
| 17266475 | Tnfaip1       | 1.52 | 2.80E-06 | 6.85E-05 |
| 17479706 | Whamm         | 1.52 | 1.44E-05 | 2.49E-04 |
| 17325651 | Igsf11        | 1.52 | 2.56E-05 | 3.91E-04 |
| 17281280 | Mbip          | 1.52 | 6.55E-05 | 8.03E-04 |
| 17483385 | Phkg2         | 1.52 | 7.33E-06 | 1.43E-04 |
| 17327524 | Igsf5         | 1.52 | 5.54E-06 | 1.18E-04 |
| 17271118 | Pitpnc1       | 1.52 | 8.97E-06 | 1.68E-04 |
| 17330099 | Parp14        | 1.52 | 2.88E-06 | 7.02E-05 |
| 17481982 | Far1          | 1.52 | 8.40E-06 | 1.59E-04 |
| 17257660 | Gm11714       | 1.52 | 1.13E-04 | 1.25E-03 |
| 17427345 | Cyp2j12       | 1.52 | 8.10E-05 | 9.59E-04 |
| 17418916 | Rnf19b        | 1.52 | 6.03E-05 | 7.56E-04 |
| 17527977 | Glce          | 1.52 | 5.29E-05 | 6.80E-04 |
| 17479616 | Zfp592        | 1.52 | 9.65E-06 | 1.80E-04 |
| 17469289 | Eogt          | 1.52 | 4.31E-04 | 3.53E-03 |
| 17401846 | Vav3          | 1.52 | 1.14E-04 | 1.26E-03 |
| 17216201 | Gin1          | 1.51 | 3.51E-04 | 3.00E-03 |
| 17302472 | Kctd12        | 1.51 | 3.67E-04 | 3.12E-03 |
| 17347042 | Ndc80         | 1.51 | 2.18E-04 | 2.09E-03 |
| 17388406 | Slc35c1       | 1.51 | 1.46E-06 | 4.19E-05 |
| 17355231 | Ptpn2         | 1.51 | 1.71E-05 | 2.87E-04 |
| 17348840 | Rnf125        | 1.51 | 4.24E-04 | 3.48E-03 |
| 17231387 | Mthfd1l       | 1.51 | 1.02E-04 | 1.15E-03 |
| 17468018 | Hk2           | 1.51 | 5.68E-06 | 1.20E-04 |
| 17233149 | Ascc3         | 1.51 | 3.06E-05 | 4.52E-04 |

|          |               |      |          |          |
|----------|---------------|------|----------|----------|
| 17350952 | Rbm22         | 1.51 | 1.03E-06 | 3.19E-05 |
| 17285879 | Hist1h1a      | 1.51 | 2.38E-04 | 2.24E-03 |
| 17310673 | Ank           | 1.51 | 4.53E-05 | 6.08E-04 |
| 17541760 | Mospd1        | 1.51 | 2.75E-06 | 6.78E-05 |
| 17430521 | Tmem39b       | 1.51 | 1.87E-05 | 3.06E-04 |
| 17344114 | 1110038B12Rik | 1.51 | 4.23E-06 | 9.53E-05 |
| 17398785 | Arhgef11      | 1.51 | 3.62E-05 | 5.10E-04 |
| 17446881 | Eif2b4        | 1.51 | 3.69E-04 | 3.13E-03 |
| 17484295 | Ppp2r2d       | 1.50 | 3.68E-06 | 8.47E-05 |
| 17338258 | Al661453      | 1.50 | 3.88E-05 | 5.40E-04 |
| 17450059 | Sec31a        | 1.50 | 2.27E-06 | 5.82E-05 |
| 17258178 | Cdr2l         | 1.50 | 8.87E-04 | 6.27E-03 |
| 17299750 | Tox4          | 1.50 | 2.39E-04 | 2.25E-03 |
| 17214421 | Zfand2b       | 1.50 | 1.01E-04 | 1.14E-03 |
| 17447446 | Tada2b        | 1.50 | 2.71E-04 | 2.49E-03 |
| 17332236 | Runx1         | 1.50 | 2.71E-04 | 2.48E-03 |
| 17255558 | Hoxb9         | 1.50 | 3.00E-05 | 4.44E-04 |
| 17440409 | Golga3        | 1.50 | 1.73E-04 | 1.75E-03 |
| 17224587 | Dnpep         | 1.50 | 2.20E-06 | 5.71E-05 |
| 17265625 | Med31         | 1.50 | 1.83E-04 | 1.83E-03 |
| 17529383 | Pgm3          | 1.50 | 2.51E-05 | 3.84E-04 |
| 17488167 | Itpkc         | 1.50 | 1.14E-03 | 7.69E-03 |
| 17513835 | Ankrd11       | 1.50 | 6.26E-06 | 1.29E-04 |
| 17345465 | Srf           | 1.50 | 4.10E-05 | 5.64E-04 |
| 17368834 | Med27         | 1.50 | 2.64E-04 | 2.43E-03 |
| 17424674 | Tln1          | 1.50 | 6.59E-05 | 8.06E-04 |
| 17364251 | Ide           | 1.50 | 5.98E-06 | 1.24E-04 |
| 17371436 | Bbs5          | 1.50 | 3.68E-04 | 3.13E-03 |
| 17429234 | Tmem125       | 1.50 | 1.07E-04 | 1.19E-03 |
| 17340584 | Tmem181c-ps   | 1.50 | 9.40E-04 | 6.57E-03 |
| 17361971 | Sac3d1        | 1.50 | 3.40E-05 | 4.90E-04 |
| 17380892 | Arfgap1       | 1.50 | 7.64E-06 | 1.47E-04 |
| 17490909 | A030001D20Rik | 1.50 | 4.88E-04 | 3.89E-03 |
| 17270999 | Ddx5          | 1.49 | 6.06E-04 | 4.61E-03 |
| 17419608 | Fam46b        | 1.49 | 1.60E-04 | 1.65E-03 |
| 17230595 | Degs1         | 1.49 | 6.79E-06 | 1.36E-04 |
| 17307117 | Gjb2          | 1.49 | 4.38E-05 | 5.94E-04 |
| 17352203 | Zfp516        | 1.49 | 2.30E-04 | 2.18E-03 |
| 17405662 | A730090N16Rik | 1.49 | 1.13E-03 | 7.60E-03 |
| 17245831 | Mbd6          | 1.49 | 6.97E-05 | 8.43E-04 |
| 17421033 | Epha2         | 1.49 | 4.78E-05 | 6.32E-04 |
| 17521371 | Tmem115       | 1.49 | 4.27E-04 | 3.50E-03 |
| 17437054 | Stx18         | 1.49 | 4.10E-05 | 5.64E-04 |
| 17222825 | Obfc2a        | 1.49 | 3.82E-06 | 8.70E-05 |
| 17300565 | Rnf31         | 1.49 | 1.21E-03 | 8.04E-03 |

|          |              |      |          |          |
|----------|--------------|------|----------|----------|
| 17361656 | Ovol1        | 1.49 | 5.42E-04 | 4.23E-03 |
| 17316831 | Nudcd1       | 1.49 | 1.04E-04 | 1.18E-03 |
| 17407684 | Pip5k1a      | 1.49 | 1.01E-04 | 1.15E-03 |
| 17475538 | LOC100862260 | 1.49 | 2.18E-04 | 2.10E-03 |
| 17462351 | Il17ra       | 1.49 | 2.38E-05 | 3.71E-04 |
| 17326208 | Cblb         | 1.48 | 2.76E-05 | 4.16E-04 |
| 17311179 | Fzd6         | 1.48 | 4.77E-05 | 6.30E-04 |
| 17495692 | Dcun1d3      | 1.48 | 1.47E-04 | 1.54E-03 |
| 17281843 | Dhrs7        | 1.48 | 4.17E-04 | 3.43E-03 |
| 17518378 | Dennd4a      | 1.48 | 5.20E-04 | 4.10E-03 |
| 17485528 | Tfpt         | 1.48 | 2.80E-04 | 2.54E-03 |
| 17519967 | Tpbp         | 1.48 | 4.88E-05 | 6.39E-04 |
| 17326166 | Cd47         | 1.48 | 2.58E-06 | 6.41E-05 |
| 17291904 | Ssr1         | 1.48 | 6.37E-05 | 7.88E-04 |
| 17348648 | Taf4b        | 1.48 | 1.68E-04 | 1.71E-03 |
| 17390561 | Catsper2     | 1.48 | 4.84E-05 | 6.37E-04 |
| 17501976 | Isyna1       | 1.48 | 4.40E-05 | 5.95E-04 |
| 17239702 | Tbpl1        | 1.48 | 5.93E-06 | 1.24E-04 |
| 17380850 | Slc17a9      | 1.48 | 2.42E-05 | 3.76E-04 |
| 17485937 | Ube2s        | 1.48 | 3.58E-05 | 5.07E-04 |
| 17379229 | Tox2         | 1.48 | 1.56E-03 | 9.90E-03 |
| 17346317 | Lonp1        | 1.48 | 8.50E-06 | 1.61E-04 |
| 17295697 | Rad17        | 1.47 | 9.28E-04 | 6.51E-03 |
| 17538161 | Prps1        | 1.47 | 3.15E-04 | 2.77E-03 |
| 17210912 | Rb1cc1       | 1.47 | 2.83E-05 | 4.24E-04 |
| 17316175 | Basp1        | 1.47 | 4.20E-05 | 5.74E-04 |
| 17274496 | Taf1b        | 1.47 | 1.15E-03 | 7.73E-03 |
| 17532953 | Tfe3         | 1.47 | 1.55E-04 | 1.60E-03 |
| 17356401 | Eif1ad       | 1.47 | 1.74E-04 | 1.75E-03 |
| 17509435 | BC088983     | 1.47 | 5.59E-04 | 4.34E-03 |
| 17488975 | Tbcb         | 1.47 | 1.08E-05 | 1.97E-04 |
| 17253688 | Ift20        | 1.47 | 1.44E-05 | 2.49E-04 |
| 17454877 | Usp42        | 1.47 | 5.48E-04 | 4.27E-03 |
| 17329776 | Senp5        | 1.47 | 7.17E-04 | 5.28E-03 |
| 17268180 | Myst2        | 1.47 | 1.35E-04 | 1.43E-03 |
| 17408211 | Pde4dip      | 1.47 | 1.32E-04 | 1.41E-03 |
| 17503937 | Mt2          | 1.47 | 1.69E-05 | 2.84E-04 |
| 17272555 | Tmc6         | 1.47 | 6.50E-05 | 7.99E-04 |
| 17548094 | Gnpnat1      | 1.47 | 1.27E-04 | 1.37E-03 |
| 17329195 | Thpo         | 1.47 | 8.22E-04 | 5.88E-03 |
| 17470580 | Apobec1      | 1.47 | 1.66E-05 | 2.80E-04 |
| 17439909 | Lrrc8c       | 1.47 | 5.64E-04 | 4.37E-03 |
| 17225728 | Hdlbp        | 1.47 | 5.61E-06 | 1.19E-04 |
| 17429026 | Kdm4a        | 1.47 | 4.30E-05 | 5.85E-04 |
| 17306835 | Rabgta       | 1.47 | 4.13E-04 | 3.40E-03 |

|          |          |      |          |          |
|----------|----------|------|----------|----------|
| 17371427 | Dhrs9    | 1.47 | 1.22E-05 | 2.18E-04 |
| 17327069 | Ifnar1   | 1.46 | 1.32E-04 | 1.41E-03 |
| 17407240 | Rps27    | 1.46 | 1.40E-03 | 9.03E-03 |
| 17245248 | Mdm2     | 1.46 | 6.54E-05 | 8.02E-04 |
| 17213295 | Nop58    | 1.46 | 5.79E-05 | 7.31E-04 |
| 17485706 | Cdc42ep5 | 1.46 | 4.72E-04 | 3.79E-03 |
| 17459918 | Pcgf1    | 1.46 | 1.02E-04 | 1.16E-03 |
| 17255918 | Cdk12    | 1.46 | 5.60E-05 | 7.13E-04 |
| 17413817 | Foxe1    | 1.46 | 5.12E-04 | 4.04E-03 |
| 17454704 | Tnrc18   | 1.46 | 2.17E-05 | 3.45E-04 |
| 17232672 | Traf3ip2 | 1.46 | 1.93E-04 | 1.91E-03 |
| 17261289 | Eml6     | 1.46 | 7.34E-04 | 5.36E-03 |
| 17399044 | Smg5     | 1.46 | 3.98E-05 | 5.52E-04 |
| 17275405 | Heatr5a  | 1.46 | 1.38E-04 | 1.46E-03 |
| 17452178 | Trafd1   | 1.46 | 7.01E-05 | 8.46E-04 |
| 17453496 | Cldn4    | 1.46 | 2.23E-06 | 5.75E-05 |
| 17531265 | Atrip    | 1.46 | 3.48E-04 | 2.99E-03 |
| 17398082 | Tiparp   | 1.46 | 6.21E-04 | 4.71E-03 |
| 17433405 | Phf13    | 1.46 | 8.18E-05 | 9.67E-04 |
| 17356848 | Sf1      | 1.46 | 6.51E-06 | 1.32E-04 |
| 17311643 | Zhx2     | 1.46 | 7.21E-04 | 5.30E-03 |
| 17402305 | Bcar3    | 1.46 | 1.77E-04 | 1.78E-03 |
| 17379911 | Rnf114   | 1.46 | 6.58E-04 | 4.92E-03 |
| 17273511 | Wdr45l   | 1.46 | 6.52E-04 | 4.89E-03 |
| 17221347 | Tram1    | 1.46 | 1.97E-06 | 5.22E-05 |
| 17314487 | Ano6     | 1.46 | 1.72E-05 | 2.88E-04 |
| 17456584 | Calu     | 1.46 | 2.20E-06 | 5.70E-05 |
| 17258584 | Sphk1    | 1.45 | 1.27E-03 | 8.37E-03 |
| 17357971 | Gna14    | 1.45 | 9.72E-04 | 6.76E-03 |
| 17443208 | Tbl2     | 1.45 | 3.47E-05 | 4.96E-04 |
| 17375275 | Pdia3    | 1.45 | 2.45E-05 | 3.79E-04 |
| 17218060 | Ptgs2    | 1.45 | 5.08E-05 | 6.57E-04 |
| 17221960 | Ptp4a1   | 1.45 | 1.08E-04 | 1.21E-03 |
| 17438113 | Cwh43    | 1.45 | 9.78E-06 | 1.82E-04 |
| 17323120 | Nde1     | 1.45 | 1.34E-03 | 8.72E-03 |
| 17305167 | Ghitm    | 1.45 | 4.34E-06 | 9.75E-05 |
| 17346185 | Dpp9     | 1.45 | 2.66E-05 | 4.03E-04 |
| 17327681 | Crebbp   | 1.45 | 2.14E-05 | 3.40E-04 |
| 17359878 | Pprc1    | 1.45 | 7.93E-05 | 9.42E-04 |
| 17496253 | Atxn2l   | 1.45 | 4.36E-05 | 5.92E-04 |
| 17235584 | Dapk3    | 1.45 | 3.79E-04 | 3.19E-03 |
| 17488544 | Nfkbib   | 1.45 | 3.24E-05 | 4.70E-04 |
| 17546234 | Vamp7    | 1.45 | 1.24E-04 | 1.34E-03 |
| 17420561 | Tmco4    | 1.45 | 1.31E-04 | 1.41E-03 |
| 17270761 | Ccdc47   | 1.45 | 2.93E-05 | 4.37E-04 |

|          |               |      |          |          |
|----------|---------------|------|----------|----------|
| 17221186 | Snhg6         | 1.45 | 6.87E-06 | 1.36E-04 |
| 17395955 | Hnf4g         | 1.44 | 8.81E-06 | 1.65E-04 |
| 17347953 | Fbxo11        | 1.44 | 6.87E-06 | 1.36E-04 |
| 17217580 | Arl8a         | 1.44 | 1.72E-04 | 1.74E-03 |
| 17337557 | H2-M3         | 1.44 | 9.85E-04 | 6.83E-03 |
| 17213192 | Cflar         | 1.44 | 2.07E-04 | 2.02E-03 |
| 17405365 | Wwtr1         | 1.44 | 2.43E-05 | 3.76E-04 |
| 17357502 | Cpsf7         | 1.44 | 3.44E-05 | 4.93E-04 |
| 17453703 | Prkrip1       | 1.44 | 1.40E-04 | 1.48E-03 |
| 17454836 | E130309D02Rik | 1.44 | 6.51E-06 | 1.32E-04 |
| 17439481 | Bmp2k         | 1.44 | 2.95E-05 | 4.39E-04 |
| 17290629 | Lgals8        | 1.44 | 1.87E-05 | 3.07E-04 |
| 17399164 | Rit1          | 1.44 | 9.66E-05 | 1.11E-03 |
| 17500270 | Zfp703        | 1.44 | 9.43E-05 | 1.08E-03 |
| 17527505 | 1700017B05Rik | 1.44 | 1.33E-04 | 1.42E-03 |
| 17285000 | Klf6          | 1.44 | 2.57E-05 | 3.92E-04 |
| 17314222 | Acr           | 1.44 | 5.78E-04 | 4.45E-03 |
| 17290770 | Mrpl32        | 1.44 | 1.09E-03 | 7.42E-03 |
| 17445325 | Fzd1          | 1.44 | 1.53E-05 | 2.62E-04 |
| 17492729 | Sec11a        | 1.44 | 4.27E-05 | 5.82E-04 |
| 17223616 | Raph1         | 1.44 | 2.42E-05 | 3.75E-04 |
| 17311945 | Phf20l1       | 1.44 | 1.41E-04 | 1.49E-03 |
| 17324446 | Rtp4          | 1.43 | 7.55E-05 | 9.04E-04 |
| 17227266 | Elf3          | 1.43 | 2.62E-05 | 3.98E-04 |
| 17270583 | Nsf           | 1.43 | 3.17E-06 | 7.55E-05 |
| 17432264 | Plekhm2       | 1.43 | 2.94E-04 | 2.63E-03 |
| 17460572 | Copg          | 1.43 | 1.31E-05 | 2.31E-04 |
| 17351282 | Nedd4l        | 1.43 | 3.02E-04 | 2.69E-03 |
| 17343278 | Hsf2bp        | 1.43 | 1.49E-03 | 9.53E-03 |
| 17318249 | Fam83h        | 1.43 | 3.57E-05 | 5.07E-04 |
| 17349474 | Kdm3b         | 1.43 | 3.45E-05 | 4.94E-04 |
| 17523161 | Slc25a38      | 1.43 | 1.44E-04 | 1.52E-03 |
| 17279805 | Ncoa1         | 1.43 | 3.57E-04 | 3.05E-03 |
| 17288732 | Ttc37         | 1.43 | 6.95E-05 | 8.41E-04 |
| 17352146 | Pqlc1         | 1.43 | 4.86E-05 | 6.38E-04 |
| 17438196 | Fip1l1        | 1.43 | 1.83E-05 | 3.03E-04 |
| 17360348 | Dusp5         | 1.43 | 1.16E-04 | 1.28E-03 |
| 17361779 | Scyl1         | 1.42 | 2.48E-05 | 3.81E-04 |
| 17434027 | Plekhn1       | 1.42 | 8.55E-04 | 6.07E-03 |
| 17335441 | Kctd20        | 1.42 | 7.23E-04 | 5.30E-03 |
| 17235211 | Midn          | 1.42 | 5.02E-05 | 6.54E-04 |
| 17344706 | Trim39        | 1.42 | 9.70E-04 | 6.74E-03 |
| 17393357 | Eif6          | 1.42 | 5.06E-05 | 6.55E-04 |
| 17298426 | Capn7         | 1.42 | 2.09E-05 | 3.34E-04 |
| 17313811 | Fbln1         | 1.42 | 3.91E-04 | 3.26E-03 |

|          |               |      |          |          |
|----------|---------------|------|----------|----------|
| 17515786 | Arhgap32      | 1.42 | 5.58E-04 | 4.34E-03 |
| 17396702 | Zfp639        | 1.42 | 6.07E-05 | 7.60E-04 |
| 17252038 | Zmynd15       | 1.42 | 1.13E-04 | 1.25E-03 |
| 17492523 | Unc45a        | 1.42 | 2.69E-04 | 2.47E-03 |
| 17358051 | Trpm6         | 1.42 | 3.85E-04 | 3.23E-03 |
| 17496806 | Prss8         | 1.42 | 1.33E-04 | 1.42E-03 |
| 17327995 | Carhsp1       | 1.42 | 3.22E-05 | 4.68E-04 |
| 17265710 | Cyb5d2        | 1.42 | 2.42E-04 | 2.27E-03 |
| 17445568 | Dmtf1         | 1.42 | 8.36E-06 | 1.59E-04 |
| 17524731 | Yipf2         | 1.42 | 1.31E-04 | 1.40E-03 |
| 17358422 | Vldlr         | 1.42 | 2.72E-04 | 2.49E-03 |
| 17431065 | Pigv          | 1.42 | 8.46E-04 | 6.02E-03 |
| 17344497 | Mrps18b       | 1.42 | 2.89E-04 | 2.60E-03 |
| 17480102 | Sytl2         | 1.41 | 3.39E-04 | 2.93E-03 |
| 17434381 | Krit1         | 1.41 | 1.19E-03 | 7.92E-03 |
| 17488406 | Supt5h        | 1.41 | 1.62E-04 | 1.66E-03 |
| 17236688 | Tmcc3         | 1.41 | 3.02E-05 | 4.46E-04 |
| 17447170 | Whsc2         | 1.41 | 5.04E-05 | 6.55E-04 |
| 17538912 | Kdm5c         | 1.41 | 8.44E-04 | 6.01E-03 |
| 17326438 | Cldn25        | 1.41 | 4.53E-05 | 6.08E-04 |
| 17367071 | Stam          | 1.41 | 1.55E-05 | 2.66E-04 |
| 17484469 | Zfp511        | 1.41 | 5.68E-04 | 4.39E-03 |
| 17515819 | Ets1          | 1.41 | 3.23E-04 | 2.82E-03 |
| 17219264 | B4galt3       | 1.41 | 8.28E-04 | 5.92E-03 |
| 17422269 | A430005L14Rik | 1.41 | 2.11E-04 | 2.05E-03 |
| 17346175 | D17Wsu104e    | 1.41 | 2.25E-05 | 3.54E-04 |
| 17400813 | Notch2        | 1.41 | 3.23E-04 | 2.82E-03 |
| 17441759 | Oas1b         | 1.41 | 3.92E-04 | 3.27E-03 |
| 17265268 | Cxcl16        | 1.41 | 1.22E-05 | 2.17E-04 |
| 17305748 | Gch1          | 1.41 | 4.67E-04 | 3.77E-03 |
| 17382013 | Dnajc1        | 1.41 | 5.06E-05 | 6.55E-04 |
| 17513176 | Tmem170       | 1.41 | 7.19E-05 | 8.67E-04 |
| 17274532 | Klf11         | 1.41 | 5.26E-04 | 4.13E-03 |
| 17536292 | Zfx           | 1.41 | 1.18E-03 | 7.90E-03 |
| 17279381 | AW555464      | 1.41 | 1.24E-05 | 2.20E-04 |
| 17350936 | Dctn4         | 1.41 | 1.16E-05 | 2.09E-04 |
| 17476297 | Polr2i        | 1.41 | 3.26E-05 | 4.73E-04 |
| 17378721 | Src           | 1.41 | 3.26E-05 | 4.72E-04 |
| 17361741 | Ehbp1l1       | 1.41 | 5.18E-05 | 6.67E-04 |
| 17343724 | Ring1         | 1.41 | 4.70E-04 | 3.78E-03 |
| 17219448 | Copa          | 1.41 | 1.56E-05 | 2.68E-04 |
| 17424042 | Aptx          | 1.40 | 6.45E-04 | 4.86E-03 |
| 17337228 | Ier3          | 1.40 | 2.64E-05 | 4.00E-04 |
| 17409594 | Rnpc3         | 1.40 | 1.18E-03 | 7.88E-03 |
| 17443972 | Get4          | 1.40 | 2.66E-04 | 2.44E-03 |

|          |               |      |          |          |
|----------|---------------|------|----------|----------|
| 17384252 | Gapvd1        | 1.40 | 4.02E-05 | 5.56E-04 |
| 17343263 | Sik1          | 1.40 | 9.51E-04 | 6.63E-03 |
| 17466003 | Zc3hav1       | 1.40 | 1.35E-04 | 1.43E-03 |
| 17270919 | Tex2          | 1.40 | 2.73E-04 | 2.50E-03 |
| 17229502 | Uap1          | 1.40 | 8.02E-06 | 1.53E-04 |
| 17469035 | LOC100861999  | 1.40 | 2.60E-05 | 3.96E-04 |
| 17368526 | Wdr5          | 1.40 | 1.27E-03 | 8.33E-03 |
| 17456131 | Tes           | 1.40 | 1.68E-05 | 2.83E-04 |
| 17400467 | Otud7b        | 1.40 | 1.40E-04 | 1.47E-03 |
| 17287338 | Secisbp2      | 1.40 | 3.16E-04 | 2.77E-03 |
| 17321761 | Smagp         | 1.40 | 1.28E-05 | 2.26E-04 |
| 17282868 | Sptlc2        | 1.40 | 2.96E-05 | 4.40E-04 |
| 17420646 | Ubr4          | 1.40 | 3.86E-04 | 3.23E-03 |
| 17281582 | Sos2          | 1.40 | 1.17E-04 | 1.29E-03 |
| 17442977 | Crcp          | 1.40 | 1.07E-04 | 1.19E-03 |
| 17369860 | Dpm2          | 1.40 | 1.54E-03 | 9.79E-03 |
| 17483532 | Kat8          | 1.40 | 1.81E-04 | 1.81E-03 |
| 17437598 | 0610040J01Rik | 1.40 | 7.42E-04 | 5.41E-03 |
| 17274540 | Rrm2          | 1.40 | 5.89E-04 | 4.51E-03 |
| 17249282 | Clk4          | 1.39 | 1.22E-04 | 1.33E-03 |
| 17485702 | Leng9         | 1.39 | 6.53E-04 | 4.90E-03 |
| 17413932 | Sec61b        | 1.39 | 1.40E-03 | 9.03E-03 |
| 17224462 | 1810031K17Rik | 1.39 | 1.75E-04 | 1.76E-03 |
| 17445257 | C030048B08Rik | 1.39 | 1.17E-03 | 7.84E-03 |
| 17314011 | Pim3          | 1.39 | 4.09E-04 | 3.38E-03 |
| 17507082 | Pex11c        | 1.39 | 9.20E-04 | 6.46E-03 |
| 17358891 | Pcgf5         | 1.39 | 3.81E-04 | 3.20E-03 |
| 17526206 | C2cd2l        | 1.39 | 3.09E-05 | 4.54E-04 |
| 17487796 | Rabac1        | 1.39 | 1.88E-04 | 1.87E-03 |
| 17482590 | Polr3e        | 1.39 | 3.32E-04 | 2.88E-03 |
| 17210869 | Tcea1         | 1.39 | 2.21E-05 | 3.49E-04 |
| 17465788 | Cnot4         | 1.39 | 5.80E-05 | 7.32E-04 |
| 17468298 | Exoc6b        | 1.39 | 3.22E-05 | 4.68E-04 |
| 17273751 | Itsn2         | 1.39 | 2.58E-04 | 2.38E-03 |
| 17449562 | Rassf6        | 1.39 | 5.70E-04 | 4.40E-03 |
| 17263708 | Usp22         | 1.39 | 5.71E-05 | 7.23E-04 |
| 17503559 | Tmem188       | 1.39 | 1.21E-03 | 8.04E-03 |
| 17355213 | Cep76         | 1.39 | 6.98E-04 | 5.16E-03 |
| 17499540 | Mcph1         | 1.39 | 1.08E-04 | 1.21E-03 |
| 17220166 | Acbd3         | 1.39 | 1.89E-05 | 3.10E-04 |
| 17494041 | Nup98         | 1.39 | 2.93E-04 | 2.63E-03 |
| 17409406 | Stxbp3a       | 1.39 | 1.14E-04 | 1.26E-03 |
| 17356447 | Efemp2        | 1.39 | 7.19E-04 | 5.28E-03 |
| 17393036 | Plagl2        | 1.39 | 8.58E-05 | 1.01E-03 |
| 17491440 | Nipa2         | 1.39 | 7.14E-04 | 5.26E-03 |

|          |               |      |          |          |
|----------|---------------|------|----------|----------|
| 17495475 | Smg1          | 1.38 | 1.34E-03 | 8.74E-03 |
| 17498041 | Dusp8         | 1.38 | 2.22E-04 | 2.13E-03 |
| 17216373 | Phlpp1        | 1.38 | 1.93E-04 | 1.91E-03 |
| 17258664 | Mfsd11        | 1.38 | 9.43E-04 | 6.59E-03 |
| 17281946 | Ppp2r5e       | 1.38 | 4.64E-05 | 6.19E-04 |
| 17490960 | Cyth2         | 1.38 | 9.39E-05 | 1.08E-03 |
| 17259600 | Foxk2         | 1.38 | 8.30E-04 | 5.93E-03 |
| 17386770 | Fkbp7         | 1.38 | 1.36E-03 | 8.81E-03 |
| 17256806 | Rdm1          | 1.38 | 1.58E-03 | 9.98E-03 |
| 17495271 | Copb1         | 1.38 | 3.29E-05 | 4.76E-04 |
| 17397774 | Tsc22d2       | 1.38 | 4.63E-04 | 3.75E-03 |
| 17228563 | Tor3a         | 1.38 | 2.90E-04 | 2.61E-03 |
| 17365030 | Chuk          | 1.38 | 2.05E-04 | 2.00E-03 |
| 17456318 | Ing3          | 1.38 | 4.91E-04 | 3.90E-03 |
| 17473786 | Zscan22       | 1.38 | 6.87E-04 | 5.09E-03 |
| 17349311 | Wdr36         | 1.37 | 1.13E-03 | 7.59E-03 |
| 17349745 | Ik            | 1.37 | 1.63E-05 | 2.77E-04 |
| 17320163 | Brd1          | 1.37 | 9.70E-05 | 1.11E-03 |
| 17451769 | Prkab1        | 1.37 | 1.41E-04 | 1.48E-03 |
| 17532923 | Wdr45         | 1.37 | 5.04E-04 | 3.99E-03 |
| 17290797 | Cdk13         | 1.37 | 3.77E-04 | 3.18E-03 |
| 17365692 | Smndc1        | 1.37 | 2.16E-04 | 2.08E-03 |
| 17485747 | Ppp1r12c      | 1.37 | 3.71E-04 | 3.14E-03 |
| 17518142 | Tle3          | 1.37 | 1.40E-03 | 9.00E-03 |
| 17494005 | Rnf121        | 1.37 | 1.89E-04 | 1.88E-03 |
| 17216870 | Ubxn4         | 1.37 | 4.49E-05 | 6.04E-04 |
| 17506949 | Pard3         | 1.37 | 1.82E-04 | 1.82E-03 |
| 17222837 | Myo1b         | 1.37 | 5.29E-04 | 4.15E-03 |
| 17495005 | Tmem41b       | 1.37 | 3.05E-04 | 2.71E-03 |
| 17404947 | Ankrd50       | 1.37 | 7.65E-04 | 5.55E-03 |
| 17273086 | Nploc4        | 1.37 | 2.80E-05 | 4.21E-04 |
| 17435771 | Ept1          | 1.37 | 3.59E-05 | 5.07E-04 |
| 17521593 | Ip6k1         | 1.37 | 1.04E-03 | 7.12E-03 |
| 17369218 | Dolpp1        | 1.37 | 9.29E-05 | 1.08E-03 |
| 17398020 | D630022N01Rik | 1.37 | 9.57E-04 | 6.67E-03 |
| 17239090 | Tab2          | 1.37 | 1.79E-04 | 1.80E-03 |
| 17297305 | Ngly1         | 1.37 | 3.43E-05 | 4.93E-04 |
| 17372705 | Tnks1bp1      | 1.37 | 3.68E-05 | 5.17E-04 |
| 17342642 | Dusp1         | 1.37 | 1.00E-04 | 1.14E-03 |
| 17237142 | Ppp1r12a      | 1.37 | 3.12E-04 | 2.75E-03 |
| 17493614 | Uvrag         | 1.37 | 3.39E-04 | 2.94E-03 |
| 17491979 | Mef2a         | 1.37 | 1.78E-04 | 1.79E-03 |
| 17407969 | Plekho1       | 1.37 | 6.36E-04 | 4.80E-03 |
| 17216638 | Tmem185b      | 1.37 | 5.27E-04 | 4.13E-03 |
| 17497769 | Rnh1          | 1.37 | 5.85E-04 | 4.49E-03 |



|          |               |      |          |          |
|----------|---------------|------|----------|----------|
| 17506081 | Osgin1        | 1.36 | 8.50E-04 | 6.05E-03 |
| 17212373 | Tpp2          | 1.36 | 7.86E-05 | 9.36E-04 |
| 17483772 | Sec23ip       | 1.36 | 6.09E-05 | 7.61E-04 |
| 17336838 | Vars          | 1.36 | 1.33E-03 | 8.68E-03 |
| 17385030 | Mmadhc        | 1.36 | 1.36E-04 | 1.44E-03 |
| 17436237 | Fosl2         | 1.36 | 4.25E-05 | 5.80E-04 |
| 17420486 | Ddost         | 1.36 | 3.95E-04 | 3.29E-03 |
| 17430989 | Tmem222       | 1.36 | 1.86E-04 | 1.85E-03 |
| 17233294 | Nus1          | 1.36 | 5.66E-05 | 7.17E-04 |
| 17382104 | Arhgap21      | 1.36 | 6.41E-05 | 7.91E-04 |
| 17361285 | Syt12         | 1.36 | 2.02E-04 | 1.98E-03 |
| 17392025 | Trmt6         | 1.36 | 2.48E-04 | 2.31E-03 |
| 17546834 | Ddx3y         | 1.36 | 7.37E-04 | 5.38E-03 |
| 17355955 | 1810055G02Rik | 1.36 | 2.04E-04 | 1.99E-03 |
| 17348410 | Rbbp8         | 1.36 | 8.19E-04 | 5.87E-03 |
| 17372392 | Dnajc10       | 1.36 | 9.83E-05 | 1.12E-03 |
| 17345293 | Vegfa         | 1.36 | 1.71E-04 | 1.73E-03 |
| 17507308 | Slc10a2       | 1.36 | 1.25E-04 | 1.35E-03 |
| 17460059 | Mob1a         | 1.36 | 4.89E-04 | 3.90E-03 |
| 17348449 | Riok3         | 1.36 | 4.80E-05 | 6.34E-04 |
| 17503333 | Tnpo2         | 1.36 | 4.00E-05 | 5.54E-04 |
| 17256734 | Ifi35         | 1.36 | 1.58E-03 | 9.98E-03 |
| 17222913 | Nab1          | 1.35 | 5.69E-04 | 4.40E-03 |
| 17407905 | Prpf3         | 1.35 | 3.29E-04 | 2.87E-03 |
| 17516558 | H2afx         | 1.35 | 3.20E-04 | 2.81E-03 |
| 17362320 | Al846148      | 1.35 | 1.03E-03 | 7.05E-03 |
| 17465373 | Impdh1        | 1.35 | 3.80E-04 | 3.20E-03 |
| 17548715 | LOC100861831  | 1.35 | 1.20E-03 | 7.98E-03 |
| 17233534 | Sowahc        | 1.35 | 2.84E-04 | 2.57E-03 |
| 17220364 | Srp9          | 1.35 | 2.36E-04 | 2.22E-03 |
| 17437674 | Klf3          | 1.35 | 1.63E-04 | 1.67E-03 |
| 17349671 | Ankhd1        | 1.35 | 7.11E-04 | 5.24E-03 |
| 17231859 | Ifngr1        | 1.35 | 3.36E-05 | 4.84E-04 |
| 17348983 | 2700062C07Rik | 1.35 | 1.58E-03 | 9.97E-03 |
| 17357486 | Syt7          | 1.35 | 1.00E-03 | 6.90E-03 |
| 17336322 | Rxrb          | 1.35 | 3.16E-04 | 2.77E-03 |
| 17243252 | Tjp3          | 1.35 | 1.99E-05 | 3.21E-04 |
| 17288699 | Eil2          | 1.35 | 1.24E-04 | 1.34E-03 |
| 17458020 | Arhgef5       | 1.35 | 1.67E-04 | 1.70E-03 |
| 17501891 | Cope          | 1.35 | 1.04E-04 | 1.18E-03 |
| 17245709 | Os9           | 1.34 | 4.22E-04 | 3.46E-03 |
| 17231545 | Lats1         | 1.34 | 2.14E-04 | 2.07E-03 |
| 17499376 | Upf3a         | 1.34 | 3.44E-04 | 2.97E-03 |
| 17428192 | Rnf11         | 1.34 | 5.20E-05 | 6.69E-04 |
| 17297913 | Arf4          | 1.34 | 2.57E-05 | 3.92E-04 |

|          |               |      |          |          |
|----------|---------------|------|----------|----------|
| 17248592 | Slu7          | 1.34 | 1.07E-04 | 1.20E-03 |
| 17506846 | Gm505         | 1.34 | 1.92E-04 | 1.90E-03 |
| 17426126 | Fkbp15        | 1.34 | 8.12E-04 | 5.83E-03 |
| 17245013 | Tbc1d15       | 1.34 | 9.01E-05 | 1.05E-03 |
| 17431530 | Tceb3         | 1.34 | 4.44E-04 | 3.62E-03 |
| 17252817 | Mnt           | 1.34 | 4.71E-04 | 3.79E-03 |
| 17348295 | Thoc1         | 1.34 | 7.82E-04 | 5.65E-03 |
| 17521485 | Mst1r         | 1.34 | 1.45E-04 | 1.52E-03 |
| 17341671 | Prss22        | 1.34 | 6.94E-04 | 5.13E-03 |
| 17269717 | Stat3         | 1.34 | 3.58E-05 | 5.07E-04 |
| 17378300 | Itch          | 1.34 | 8.06E-04 | 5.80E-03 |
| 17360877 | Fam45a        | 1.34 | 3.42E-04 | 2.96E-03 |
| 17444236 | Wipi2         | 1.34 | 1.58E-04 | 1.63E-03 |
| 17436574 | Rnf4          | 1.34 | 2.58E-04 | 2.39E-03 |
| 17505995 | Plcg2         | 1.34 | 3.80E-04 | 3.20E-03 |
| 17265111 | Rai12         | 1.34 | 6.55E-05 | 8.03E-04 |
| 17438438 | Srp72         | 1.34 | 3.93E-05 | 5.47E-04 |
| 17454516 | Psmg3         | 1.34 | 7.93E-05 | 9.42E-04 |
| 17245488 | Tbk1          | 1.33 | 6.85E-05 | 8.32E-04 |
| 17503681 | Cyld          | 1.33 | 1.10E-03 | 7.47E-03 |
| 17379864 | 1500012F01Rik | 1.33 | 3.42E-05 | 4.91E-04 |
| 17344309 | Tnf           | 1.33 | 6.71E-04 | 4.99E-03 |
| 17351634 | Ccdc68        | 1.33 | 1.20E-04 | 1.31E-03 |
| 17456506 | Snd1          | 1.33 | 4.05E-04 | 3.35E-03 |
| 17311286 | Oxr1          | 1.33 | 9.27E-05 | 1.07E-03 |
| 17372984 | Nup160        | 1.33 | 6.24E-04 | 4.72E-03 |
| 17332122 | Tmem50b       | 1.33 | 1.19E-03 | 7.94E-03 |
| 17506306 | Map1lc3b      | 1.33 | 5.23E-04 | 4.11E-03 |
| 17521762 | Usp19         | 1.33 | 5.43E-04 | 4.24E-03 |
| 17297503 | 2310021P13Rik | 1.33 | 4.01E-04 | 3.32E-03 |
| 17515715 | Zbtb44        | 1.33 | 6.56E-04 | 4.91E-03 |
| 17341540 | Tnfrsf12a     | 1.33 | 7.85E-04 | 5.67E-03 |
| 17232951 | Sec63         | 1.33 | 3.36E-04 | 2.92E-03 |
| 17381630 | Pfkfb3        | 1.33 | 1.39E-03 | 8.97E-03 |
| 17266146 | Gosr1         | 1.33 | 7.34E-04 | 5.36E-03 |
| 17263893 | Ulk2          | 1.33 | 1.13E-04 | 1.25E-03 |
| 17436583 | Fam193a       | 1.33 | 7.26E-04 | 5.32E-03 |
| 17257591 | Snord104      | 1.33 | 3.66E-04 | 3.11E-03 |
| 17322793 | 1810013L24Rik | 1.32 | 6.59E-05 | 8.06E-04 |
| 17337314 | Ppp1r10       | 1.32 | 1.46E-03 | 9.38E-03 |
| 17295960 | Cwc27         | 1.32 | 3.02E-04 | 2.69E-03 |
| 17230668 | Mia3          | 1.32 | 2.84E-04 | 2.57E-03 |
| 17535697 | Ssr4          | 1.32 | 4.67E-05 | 6.22E-04 |
| 17467128 | Nt5c3         | 1.32 | 1.30E-03 | 8.51E-03 |
| 17512275 | Nae1          | 1.32 | 3.26E-04 | 2.84E-03 |

|          |               |      |          |          |
|----------|---------------|------|----------|----------|
| 17296355 | Itga2         | 1.32 | 3.36E-04 | 2.92E-03 |
| 17504727 | Elmo3         | 1.32 | 9.07E-04 | 6.38E-03 |
| 17520815 | Msl2          | 1.32 | 6.48E-04 | 4.87E-03 |
| 17475597 | Sertad1       | 1.32 | 2.26E-04 | 2.16E-03 |
| 17316207 | Trio          | 1.32 | 9.51E-04 | 6.63E-03 |
| 17522651 | Clasp2        | 1.32 | 1.02E-03 | 7.03E-03 |
| 17219362 | F11r          | 1.32 | 1.73E-04 | 1.75E-03 |
| 17407721 | Gabpb2        | 1.32 | 1.39E-03 | 8.95E-03 |
| 17481960 | Arntl         | 1.32 | 1.87E-04 | 1.86E-03 |
| 17410043 | Mettl14       | 1.32 | 1.72E-04 | 1.74E-03 |
| 17277370 | Eif2b2        | 1.32 | 4.01E-04 | 3.33E-03 |
| 17348250 | Wac           | 1.32 | 1.08E-04 | 1.21E-03 |
| 17283131 | Ptpn21        | 1.32 | 1.58E-03 | 9.98E-03 |
| 17244102 | Scyl2         | 1.32 | 8.77E-05 | 1.03E-03 |
| 17413211 | Vcp           | 1.31 | 2.76E-04 | 2.52E-03 |
| 17511450 | Siah1a        | 1.31 | 2.92E-04 | 2.62E-03 |
| 17431562 | Kdm1a         | 1.31 | 1.22E-03 | 8.09E-03 |
| 17317900 | Gm10362       | 1.31 | 7.24E-04 | 5.31E-03 |
| 17248288 | Sh3pxd2b      | 1.31 | 3.06E-04 | 2.71E-03 |
| 17234972 | 9130017N09Rik | 1.31 | 1.04E-04 | 1.17E-03 |
| 17448324 | 1110003E01Rik | 1.31 | 2.26E-04 | 2.15E-03 |
| 17424077 | B4galt1       | 1.31 | 2.18E-04 | 2.10E-03 |
| 17474558 | Ercc1         | 1.31 | 6.59E-04 | 4.93E-03 |
| 17265853 | Pafah1b1      | 1.31 | 4.73E-04 | 3.80E-03 |
| 17512009 | Csnk2a2       | 1.31 | 5.50E-04 | 4.28E-03 |
| 17525661 | Tbrg1         | 1.31 | 1.20E-04 | 1.31E-03 |
| 17305856 | Exoc5         | 1.31 | 5.04E-04 | 3.99E-03 |
| 17543336 | Las1l         | 1.31 | 4.85E-04 | 3.88E-03 |
| 17520315 | Plscr1        | 1.31 | 8.37E-04 | 5.97E-03 |
| 17543829 | Rlim          | 1.31 | 7.38E-05 | 8.86E-04 |
| 17326859 | Usp16         | 1.31 | 1.61E-04 | 1.65E-03 |
| 17267745 | Tom1l1        | 1.31 | 3.74E-05 | 5.24E-04 |
| 17403681 | Zzz3          | 1.31 | 3.11E-04 | 2.74E-03 |
| 17214998 | Itm2c         | 1.31 | 7.03E-04 | 5.19E-03 |
| 17391332 | Mal           | 1.31 | 6.70E-04 | 4.99E-03 |
| 17261107 | Rel           | 1.31 | 8.40E-04 | 5.99E-03 |
| 17495414 | Pik3c2a       | 1.31 | 9.67E-05 | 1.11E-03 |
| 17281529 | Nemf          | 1.31 | 5.74E-04 | 4.43E-03 |
| 17245587 | Mon2          | 1.31 | 1.83E-04 | 1.83E-03 |
| 17354969 | Txn1l         | 1.31 | 2.55E-04 | 2.36E-03 |
| 17354263 | Fem1c         | 1.31 | 1.21E-03 | 8.04E-03 |
| 17511453 | N4bp1         | 1.31 | 8.95E-04 | 6.31E-03 |
| 17530128 | Nck1          | 1.30 | 7.71E-04 | 5.58E-03 |
| 17410542 | Nfkb1         | 1.30 | 1.60E-04 | 1.65E-03 |
| 17400317 | Lass2         | 1.30 | 9.86E-04 | 6.83E-03 |

|          |         |      |          |          |
|----------|---------|------|----------|----------|
| 17228136 | Lamc2   | 1.30 | 1.49E-03 | 9.52E-03 |
| 17259344 | Hgs     | 1.30 | 8.38E-04 | 5.97E-03 |
| 17292817 | Rab24   | 1.30 | 2.32E-04 | 2.20E-03 |
| 17466659 | Tra2a   | 1.30 | 2.92E-04 | 2.62E-03 |
| 17483220 | Cdipt   | 1.30 | 8.21E-04 | 5.87E-03 |
| 17459196 | Tnip3   | 1.30 | 2.84E-04 | 2.57E-03 |
| 17267076 | Ggnbp2  | 1.30 | 7.71E-05 | 9.20E-04 |
| 17428142 | Osbp19  | 1.30 | 1.98E-04 | 1.95E-03 |
| 17320887 | Scaf11  | 1.30 | 6.23E-05 | 7.75E-04 |
| 17227384 | Pkp1    | 1.30 | 1.75E-04 | 1.76E-03 |
| 17403340 | Odf2l   | 1.30 | 2.95E-04 | 2.64E-03 |
| 17297080 | Pxk     | 1.30 | 1.51E-04 | 1.58E-03 |
| 17515196 | Qtrt1   | 1.30 | 1.05E-03 | 7.19E-03 |
| 17293089 | Ubqln1  | 1.30 | 2.32E-04 | 2.20E-03 |
| 17426855 | Ttc39b  | 1.30 | 7.47E-04 | 5.44E-03 |
| 17437390 | Pi4k2b  | 1.30 | 1.35E-04 | 1.43E-03 |
| 17281148 | Baz1a   | 1.30 | 9.73E-04 | 6.76E-03 |
| 17429933 | Zc3h12a | 1.30 | 8.12E-04 | 5.83E-03 |
| 17366093 | Eif3a   | 1.30 | 8.30E-05 | 9.80E-04 |
| 17381330 | Optn    | 1.30 | 2.78E-04 | 2.53E-03 |
| 17240945 | Serinc1 | 1.30 | 8.09E-05 | 9.59E-04 |
| 17496283 | Eif3c   | 1.30 | 5.05E-05 | 6.55E-04 |
| 17323945 | Abcf3   | 1.30 | 1.42E-03 | 9.10E-03 |
| 17541926 | Fgf13   | 1.30 | 4.41E-04 | 3.60E-03 |
| 17463973 | Plekha5 | 1.30 | 4.88E-04 | 3.89E-03 |
| 17239227 | Rab32   | 1.30 | 4.93E-04 | 3.92E-03 |
| 17423291 | Esrp1   | 1.30 | 2.10E-04 | 2.04E-03 |
| 17496049 | Nsmce1  | 1.30 | 5.91E-04 | 4.52E-03 |
| 17350447 | Dmxl1   | 1.30 | 1.91E-04 | 1.89E-03 |
| 17443148 | Cldn3   | 1.30 | 7.76E-05 | 9.25E-04 |
| 17468469 | Dusp11  | 1.30 | 1.05E-03 | 7.18E-03 |
| 17374743 | Gm14137 | 1.30 | 3.31E-04 | 2.88E-03 |
| 17381043 | Tpd52l2 | 1.30 | 2.68E-04 | 2.46E-03 |
| 17239787 | Enpp1   | 1.30 | 1.02E-03 | 7.02E-03 |
| 17283293 | Gpr68   | 1.29 | 1.32E-03 | 8.60E-03 |
| 17323759 | Ufd1l   | 1.29 | 3.10E-04 | 2.74E-03 |
| 17400599 | Txnip   | 1.29 | 4.99E-05 | 6.50E-04 |
| 17327428 | Dyrk1a  | 1.29 | 9.99E-04 | 6.90E-03 |
| 17380185 | Rae1    | 1.29 | 1.35E-04 | 1.43E-03 |
| 17461177 | Ppp4r2  | 1.29 | 4.08E-04 | 3.37E-03 |
| 17318907 | Eif3d   | 1.29 | 4.85E-04 | 3.88E-03 |
| 17297462 | Sec24c  | 1.29 | 2.72E-04 | 2.49E-03 |
| 17243661 | Prdm4   | 1.29 | 1.72E-04 | 1.74E-03 |
| 17503226 | Farsa   | 1.29 | 1.55E-03 | 9.81E-03 |
| 17467823 | Kcmf1   | 1.29 | 2.30E-04 | 2.19E-03 |

|          |               |      |          |          |
|----------|---------------|------|----------|----------|
| 17287185 | Nol8          | 1.29 | 5.89E-04 | 4.51E-03 |
| 17277387 | Fos           | 1.29 | 3.24E-04 | 2.83E-03 |
| 17227729 | Cdc73         | 1.29 | 1.11E-03 | 7.53E-03 |
| 17385967 | Galnt3        | 1.29 | 1.52E-04 | 1.58E-03 |
| 17229839 | Gm20101       | 1.29 | 1.35E-03 | 8.77E-03 |
| 17448960 | Clock         | 1.29 | 7.58E-04 | 5.50E-03 |
| 17490859 | Nucb1         | 1.29 | 5.74E-04 | 4.43E-03 |
| 17338882 | Dus3l         | 1.29 | 1.04E-03 | 7.15E-03 |
| 17326846 | N6amt1        | 1.29 | 3.88E-04 | 3.25E-03 |
| 17290056 | Mocs2         | 1.29 | 1.26E-03 | 8.27E-03 |
| 17402953 | Ppp3ca        | 1.29 | 1.18E-03 | 7.92E-03 |
| 17315438 | Prr13         | 1.29 | 9.37E-04 | 6.56E-03 |
| 17379128 | Srsf6         | 1.28 | 7.10E-04 | 5.23E-03 |
| 17257331 | Tlk2          | 1.28 | 3.01E-04 | 2.69E-03 |
| 17222642 | Fhl2          | 1.28 | 8.74E-04 | 6.19E-03 |
| 17430140 | Ncdn          | 1.28 | 5.60E-04 | 4.35E-03 |
| 17504160 | Polr2c        | 1.28 | 1.39E-03 | 8.95E-03 |
| 17237170 | Pawr          | 1.28 | 2.48E-04 | 2.31E-03 |
| 17212518 | Wdr75         | 1.28 | 2.62E-04 | 2.42E-03 |
| 17237186 | E2f7          | 1.28 | 1.25E-03 | 8.23E-03 |
| 17303400 | Pdhb          | 1.28 | 9.09E-04 | 6.39E-03 |
| 17221490 | Ube2w         | 1.28 | 8.93E-04 | 6.30E-03 |
| 17365421 | Nt5c2         | 1.28 | 6.73E-04 | 5.01E-03 |
| 17353585 | Sil1          | 1.28 | 1.78E-04 | 1.79E-03 |
| 17337441 | Trim26        | 1.28 | 1.34E-03 | 8.72E-03 |
| 17390186 | Tmem87a       | 1.28 | 1.47E-03 | 9.43E-03 |
| 17315810 | Nipbl         | 1.28 | 1.39E-03 | 8.95E-03 |
| 17247993 | Smek2         | 1.28 | 4.67E-04 | 3.77E-03 |
| 17353541 | Etf1          | 1.28 | 5.53E-04 | 4.30E-03 |
| 17362869 | AW112010      | 1.28 | 2.23E-04 | 2.14E-03 |
| 17540267 | Gm14635       | 1.28 | 1.13E-03 | 7.60E-03 |
| 17326816 | Gabpa         | 1.28 | 4.00E-04 | 3.32E-03 |
| 17510572 | Med26         | 1.27 | 4.05E-04 | 3.35E-03 |
| 17315946 | Dnajc21       | 1.27 | 1.02E-03 | 7.02E-03 |
| 17250812 | Fam18b        | 1.27 | 2.44E-04 | 2.29E-03 |
| 17239113 | Sash1         | 1.27 | 1.57E-03 | 9.91E-03 |
| 17396593 | Sec62         | 1.27 | 6.65E-04 | 4.96E-03 |
| 17359055 | Exoc6         | 1.27 | 8.57E-04 | 6.08E-03 |
| 17460622 | Rpn1          | 1.27 | 3.40E-04 | 2.94E-03 |
| 17495223 | Btbd10        | 1.27 | 9.88E-04 | 6.83E-03 |
| 17398571 | Tmem154       | 1.27 | 4.77E-04 | 3.82E-03 |
| 17355962 | Suv420h1      | 1.27 | 1.19E-03 | 7.94E-03 |
| 17534051 | Il13ra1       | 1.27 | 8.94E-04 | 6.30E-03 |
| 17467730 | Rnf181        | 1.27 | 7.38E-04 | 5.38E-03 |
| 17276884 | 4933426M11Rik | 1.27 | 3.10E-04 | 2.74E-03 |

|          |               |      |          |          |
|----------|---------------|------|----------|----------|
| 17357338 | Mta2          | 1.27 | 3.63E-04 | 3.09E-03 |
| 17286231 | Sox4          | 1.27 | 5.86E-04 | 4.50E-03 |
| 17436507 | Whsc1         | 1.27 | 4.06E-04 | 3.36E-03 |
| 17312280 | Gsdmd         | 1.27 | 2.75E-04 | 2.51E-03 |
| 17408813 | Cttnbp2nl     | 1.27 | 7.32E-04 | 5.36E-03 |
| 17262326 | Maml1         | 1.27 | 1.32E-03 | 8.61E-03 |
| 17466204 | E330009J07Rik | 1.27 | 5.99E-04 | 4.57E-03 |
| 17412860 | Ubap1         | 1.27 | 1.33E-03 | 8.67E-03 |
| 17522761 | Dync1li1      | 1.26 | 4.90E-04 | 3.90E-03 |
| 17227570 | Nek7          | 1.26 | 5.92E-04 | 4.52E-03 |
| 17294805 | Zcchc9        | 1.26 | 4.99E-04 | 3.96E-03 |
| 17397320 | Larp1b        | 1.26 | 1.21E-03 | 8.05E-03 |
| 17349139 | Sap130        | 1.26 | 2.80E-04 | 2.54E-03 |
| 17224661 | Epha4         | 1.26 | 9.71E-04 | 6.75E-03 |
| 17229715 | Ufc1          | 1.26 | 4.24E-04 | 3.48E-03 |
| 17234116 | Ccdc6         | 1.26 | 8.91E-04 | 6.29E-03 |
| 17518664 | Ppib          | 1.26 | 1.05E-03 | 7.21E-03 |
| 17504964 | Edc4          | 1.26 | 4.64E-04 | 3.75E-03 |
| 17236415 | Uhrf1bp1l     | 1.26 | 6.80E-04 | 5.05E-03 |
| 17364565 | Blnk          | 1.26 | 7.18E-04 | 5.28E-03 |
| 17353554 | Hspa9         | 1.26 | 2.68E-04 | 2.47E-03 |
| 17508300 | Adam9         | 1.26 | 2.36E-04 | 2.23E-03 |
| 17231301 | Cr1l          | 1.26 | 2.36E-04 | 2.23E-03 |
| 17231118 | Rcor3         | 1.26 | 1.48E-03 | 9.45E-03 |
| 17410410 | Sgms2         | 1.26 | 4.52E-04 | 3.68E-03 |
| 17248728 | Clint1        | 1.25 | 6.47E-04 | 4.87E-03 |
| 17448415 | Apbb2         | 1.25 | 8.80E-04 | 6.22E-03 |
| 17511259 | Junb          | 1.25 | 1.11E-03 | 7.49E-03 |
| 17378692 | Rpn2          | 1.25 | 4.95E-04 | 3.93E-03 |
| 17448335 | Pds5a         | 1.25 | 9.93E-04 | 6.87E-03 |
| 17510563 | Slc35e1       | 1.25 | 3.79E-04 | 3.19E-03 |
| 17334625 | 0610007P22Rik | 1.25 | 6.58E-04 | 4.92E-03 |
| 17335616 | Zfand3        | 1.25 | 1.20E-03 | 7.98E-03 |
| 17483501 | Zfp646        | 1.25 | 9.41E-04 | 6.57E-03 |
| 17431362 | Tmem57        | 1.25 | 3.64E-04 | 3.10E-03 |
| 17275015 | Agr2          | 1.25 | 7.30E-04 | 5.34E-03 |
| 17441365 | Taok3         | 1.25 | 8.53E-04 | 6.06E-03 |
| 17519509 | Leo1          | 1.25 | 4.12E-04 | 3.40E-03 |
| 17382156 | Abi1          | 1.25 | 2.45E-04 | 2.29E-03 |
| 17526349 | Arcn1         | 1.25 | 7.51E-04 | 5.46E-03 |
| 17548446 | Ormdl2        | 1.24 | 3.03E-04 | 2.69E-03 |
| 17392056 | Fermt1        | 1.24 | 1.58E-03 | 9.98E-03 |
| 17398023 | Gmps          | 1.24 | 1.46E-03 | 9.36E-03 |
| 17469802 | Sec13         | 1.24 | 1.15E-03 | 7.71E-03 |
| 17407272 | Ints3         | 1.24 | 4.75E-04 | 3.82E-03 |

|          |               |      |          |          |
|----------|---------------|------|----------|----------|
| 17468511 | Mxd1          | 1.24 | 6.66E-04 | 4.97E-03 |
| 17398287 | Nmd3          | 1.24 | 1.50E-03 | 9.55E-03 |
| 17419995 | Gale          | 1.24 | 6.06E-04 | 4.61E-03 |
| 17495262 | Rras2         | 1.24 | 6.89E-04 | 5.10E-03 |
| 17230651 | Brox          | 1.24 | 1.12E-03 | 7.56E-03 |
| 17361558 | Sart1         | 1.24 | 1.03E-03 | 7.06E-03 |
| 17312946 | Gm10863       | 1.23 | 1.33E-03 | 8.67E-03 |
| 17257051 | Nmt1          | 1.23 | 1.10E-03 | 7.44E-03 |
| 17480078 | Picalm        | 1.23 | 8.99E-04 | 6.33E-03 |
| 17305685 | Ddhd1         | 1.22 | 1.05E-03 | 7.18E-03 |
| 17338796 | Safb          | 1.22 | 9.92E-04 | 6.86E-03 |
| 17444338 | Kdelr2        | 1.22 | 4.54E-04 | 3.69E-03 |
| 17225760 | Stk25         | 1.22 | 1.01E-03 | 6.99E-03 |
| 17402181 | F3            | 1.21 | 1.58E-03 | 9.98E-03 |
| 17385684 | Rbms1         | 1.21 | 1.49E-03 | 9.52E-03 |
| 17231784 | Cited2        | 1.21 | 1.49E-03 | 9.52E-03 |
| 17506603 | Tcf25         | 1.20 | 8.92E-04 | 6.29E-03 |
| 17436077 | Nrbp1         | 1.20 | 1.49E-03 | 9.52E-03 |
| 17365134 | Ndufb8        | 0.84 | 1.23E-03 | 8.11E-03 |
| 17384632 | Strbp         | 0.84 | 1.28E-03 | 8.37E-03 |
| 17319619 | Ndufa6        | 0.83 | 1.11E-03 | 7.51E-03 |
| 17374098 | Lgr4          | 0.83 | 9.86E-04 | 6.83E-03 |
| 17212080 | Pdcl3         | 0.83 | 1.55E-03 | 9.81E-03 |
| 17505774 | Gabarapl2     | 0.83 | 1.59E-03 | 9.98E-03 |
| 17255157 | Nme1          | 0.83 | 1.02E-03 | 7.04E-03 |
| 17234926 | Bsg           | 0.83 | 8.76E-04 | 6.20E-03 |
| 17229665 | Ndufs2        | 0.82 | 7.91E-04 | 5.70E-03 |
| 17334932 | Ergic1        | 0.82 | 1.54E-03 | 9.79E-03 |
| 17332860 | Tulp4         | 0.82 | 1.14E-03 | 7.69E-03 |
| 17374089 | Lin7c         | 0.82 | 7.70E-04 | 5.57E-03 |
| 17480813 | Stard10       | 0.82 | 1.47E-03 | 9.40E-03 |
| 17335842 | Pde9a         | 0.82 | 9.99E-04 | 6.90E-03 |
| 17233629 | Psap          | 0.82 | 1.47E-03 | 9.39E-03 |
| 17517116 | Timm8b        | 0.82 | 7.82E-04 | 5.65E-03 |
| 17489620 | Gpi1          | 0.82 | 1.21E-03 | 8.04E-03 |
| 17493526 | Capn5         | 0.82 | 6.54E-04 | 4.91E-03 |
| 17282732 | O610007P14Rik | 0.81 | 5.37E-04 | 4.20E-03 |
| 17263004 | Atox1         | 0.81 | 1.38E-03 | 8.92E-03 |
| 17367686 | Il1rn         | 0.81 | 6.48E-04 | 4.87E-03 |
| 17449804 | Ccni          | 0.81 | 6.59E-04 | 4.92E-03 |
| 17310912 | Laptm4b       | 0.81 | 1.57E-03 | 9.92E-03 |
| 17482730 | Dctn5         | 0.81 | 1.10E-03 | 7.47E-03 |
| 17374218 | Lpcat4        | 0.81 | 7.41E-04 | 5.41E-03 |
| 17361056 | Ndufv1        | 0.81 | 1.28E-03 | 8.39E-03 |
| 17311315 | Ttc35         | 0.81 | 1.56E-03 | 9.90E-03 |

|          |           |      |          |          |
|----------|-----------|------|----------|----------|
| 17386396 | Slc25a12  | 0.81 | 6.88E-04 | 5.10E-03 |
| 17503942 | Mt1       | 0.81 | 1.30E-03 | 8.51E-03 |
| 17243014 | Fam108a   | 0.81 | 1.56E-03 | 9.90E-03 |
| 17470879 | Tpi1      | 0.81 | 1.55E-03 | 9.81E-03 |
| 17312396 | Cyc1      | 0.81 | 4.00E-04 | 3.32E-03 |
| 17396750 | Ndufb5    | 0.81 | 1.36E-03 | 8.84E-03 |
| 17328288 | Pdxdc1    | 0.81 | 1.36E-03 | 8.85E-03 |
| 17334262 | Pgp       | 0.81 | 8.52E-04 | 6.05E-03 |
| 17261098 | Pex13     | 0.81 | 7.60E-04 | 5.52E-03 |
| 17223283 | Satb2     | 0.81 | 6.69E-04 | 4.98E-03 |
| 17534112 | Slc25a5   | 0.81 | 7.82E-04 | 5.65E-03 |
| 17538096 | Rnf128    | 0.81 | 4.91E-04 | 3.90E-03 |
| 17238571 | Dnajc14   | 0.81 | 1.12E-03 | 7.57E-03 |
| 17463056 | Chd4      | 0.81 | 1.05E-03 | 7.18E-03 |
| 17366039 | Pdzd8     | 0.81 | 1.09E-03 | 7.44E-03 |
| 17214665 | Sgpp2     | 0.80 | 1.53E-03 | 9.74E-03 |
| 17216836 | R3hdm1    | 0.80 | 1.58E-03 | 9.98E-03 |
| 17501050 | Irf2      | 0.80 | 1.08E-03 | 7.37E-03 |
| 17449313 | Ugt2b34   | 0.80 | 1.08E-03 | 7.35E-03 |
| 17379808 | Cse1l     | 0.80 | 1.18E-03 | 7.91E-03 |
| 17465671 | Chchd3    | 0.80 | 1.22E-03 | 8.09E-03 |
| 17523555 | Exosc7    | 0.80 | 5.26E-04 | 4.13E-03 |
| 17401500 | Dram2     | 0.80 | 5.42E-04 | 4.23E-03 |
| 17530742 | Tex264    | 0.80 | 1.49E-03 | 9.50E-03 |
| 17498461 | Fadd      | 0.80 | 1.26E-03 | 8.30E-03 |
| 17379439 | Pigt      | 0.80 | 5.84E-04 | 4.49E-03 |
| 17296013 | Ipo11     | 0.80 | 5.59E-04 | 4.34E-03 |
| 17471166 | Ndufa9    | 0.80 | 8.41E-04 | 5.99E-03 |
| 17454069 | Mospd3    | 0.80 | 8.45E-04 | 6.01E-03 |
| 17542382 | Bcap31    | 0.80 | 3.48E-04 | 2.99E-03 |
| 17542853 | Pls3      | 0.80 | 1.01E-03 | 6.94E-03 |
| 17256959 | Grn       | 0.80 | 8.12E-04 | 5.83E-03 |
| 17300429 | Dhrs4     | 0.80 | 9.74E-04 | 6.76E-03 |
| 17355169 | Afg3l2    | 0.80 | 1.17E-03 | 7.84E-03 |
| 17247695 | Xpo1      | 0.80 | 1.03E-03 | 7.09E-03 |
| 17235268 | Ndufs7    | 0.80 | 9.60E-04 | 6.69E-03 |
| 17216436 | Serpinb11 | 0.80 | 1.21E-03 | 8.04E-03 |
| 17350140 | Tcerg1    | 0.80 | 6.18E-04 | 4.69E-03 |
| 17326266 | Senp7     | 0.80 | 1.44E-03 | 9.26E-03 |
| 17425533 | Epb4.1l4b | 0.80 | 7.01E-04 | 5.18E-03 |
| 17484881 | Taldo1    | 0.80 | 1.52E-03 | 9.68E-03 |
| 17527934 | Kif23     | 0.80 | 6.36E-04 | 4.80E-03 |
| 17535607 | Slc6a8    | 0.80 | 3.36E-04 | 2.91E-03 |
| 17525288 | Tmem45b   | 0.79 | 2.51E-04 | 2.33E-03 |
| 17362156 | Plcb3     | 0.79 | 6.77E-04 | 5.03E-03 |



|          |               |      |          |          |
|----------|---------------|------|----------|----------|
| 17502944 | Ndufb7        | 0.79 | 2.75E-04 | 2.51E-03 |
| 17320907 | Slc38a1       | 0.79 | 1.12E-03 | 7.58E-03 |
| 17331669 | App           | 0.79 | 2.89E-04 | 2.60E-03 |
| 17406867 | Dap3          | 0.79 | 1.22E-03 | 8.09E-03 |
| 17501427 | Cbr4          | 0.79 | 1.09E-03 | 7.42E-03 |
| 17510057 | Klhl26        | 0.79 | 8.31E-04 | 5.93E-03 |
| 17512666 | Smpd3         | 0.79 | 6.85E-04 | 5.08E-03 |
| 17233273 | Dcbld1        | 0.79 | 9.04E-04 | 6.37E-03 |
| 17526813 | Pts           | 0.79 | 9.37E-04 | 6.56E-03 |
| 17377418 | Cst3          | 0.79 | 4.23E-04 | 3.47E-03 |
| 17439037 | Parm1         | 0.79 | 3.77E-04 | 3.18E-03 |
| 17362197 | Vegfb         | 0.79 | 3.76E-04 | 3.18E-03 |
| 17417738 | Hyi           | 0.79 | 6.70E-04 | 4.99E-03 |
| 17525955 | Sc5d          | 0.79 | 2.77E-04 | 2.52E-03 |
| 17431377 | Tmem50a       | 0.79 | 1.23E-03 | 8.13E-03 |
| 17491115 | Ush1c         | 0.79 | 1.21E-03 | 8.05E-03 |
| 17391971 | Pcna          | 0.79 | 1.54E-04 | 1.60E-03 |
| 17548068 | LOC100504825  | 0.79 | 5.45E-04 | 4.25E-03 |
| 17462926 | Phb2          | 0.79 | 6.13E-04 | 4.66E-03 |
| 17390997 | Secisbp2l     | 0.79 | 5.58E-04 | 4.33E-03 |
| 17377126 | Dtd1          | 0.79 | 5.22E-04 | 4.11E-03 |
| 17527532 | Mpi           | 0.79 | 7.86E-04 | 5.67E-03 |
| 17539415 | Rbbp7         | 0.79 | 4.64E-04 | 3.75E-03 |
| 17289717 | Elovl7        | 0.79 | 2.75E-04 | 2.51E-03 |
| 17342414 | Rhot2         | 0.79 | 8.84E-04 | 6.25E-03 |
| 17497741 | Ano9          | 0.79 | 1.56E-03 | 9.90E-03 |
| 17502527 | Isx           | 0.79 | 2.50E-04 | 2.32E-03 |
| 17400759 | Acp6          | 0.79 | 5.43E-04 | 4.23E-03 |
| 17214234 | Vil1          | 0.78 | 2.24E-04 | 2.14E-03 |
| 17418904 | Ak2           | 0.78 | 1.31E-03 | 8.57E-03 |
| 17317086 | Taf2          | 0.78 | 7.12E-04 | 5.24E-03 |
| 17416427 | Tmem59        | 0.78 | 5.20E-04 | 4.10E-03 |
| 17255828 | Mllt6         | 0.78 | 6.76E-04 | 5.02E-03 |
| 17306785 | Nedd8         | 0.78 | 1.63E-04 | 1.67E-03 |
| 17470445 | Atp6v1e1      | 0.78 | 2.70E-04 | 2.48E-03 |
| 17358690 | Papss2        | 0.78 | 1.42E-03 | 9.12E-03 |
| 17401463 | 1810022K09Rik | 0.78 | 2.40E-04 | 2.25E-03 |
| 17360501 | Tcf7l2        | 0.78 | 2.52E-04 | 2.34E-03 |
| 17483486 | Stx4a         | 0.78 | 3.89E-04 | 3.25E-03 |
| 17246131 | Obfc2b        | 0.78 | 3.61E-04 | 3.08E-03 |
| 17533282 | Mid1ip1       | 0.78 | 2.75E-04 | 2.51E-03 |
| 17327660 | Trap1         | 0.78 | 1.25E-03 | 8.23E-03 |
| 17238482 | Rnf41         | 0.78 | 1.07E-03 | 7.29E-03 |
| 17443231 | Baz1b         | 0.78 | 2.40E-04 | 2.25E-03 |
| 17314679 | Tuba1b        | 0.78 | 3.62E-04 | 3.08E-03 |

|          |               |      |          |          |
|----------|---------------|------|----------|----------|
| 17492847 | Btbd1         | 0.78 | 8.63E-04 | 6.12E-03 |
| 17440923 | Ube3b         | 0.78 | 1.24E-03 | 8.21E-03 |
| 17442149 | P2rx4         | 0.78 | 1.35E-03 | 8.74E-03 |
| 17258547 | 2310004N24Rik | 0.78 | 1.19E-03 | 7.97E-03 |
| 17234436 | Chchd10       | 0.78 | 1.37E-03 | 8.86E-03 |
| 17400403 | Golph3l       | 0.78 | 6.02E-04 | 4.59E-03 |
| 17258131 | Slc9a3r1      | 0.78 | 2.60E-04 | 2.40E-03 |
| 17309293 | Rnf219        | 0.78 | 7.31E-04 | 5.35E-03 |
| 17266038 | Fam101b       | 0.78 | 2.46E-04 | 2.30E-03 |
| 17388353 | Gylt1b        | 0.78 | 1.41E-03 | 9.07E-03 |
| 17456285 | Naa38         | 0.78 | 3.97E-04 | 3.31E-03 |
| 17484382 | Inpp5a        | 0.78 | 6.41E-04 | 4.83E-03 |
| 17252113 | Mink1         | 0.78 | 4.50E-04 | 3.66E-03 |
| 17435189 | Mll5          | 0.78 | 4.17E-04 | 3.43E-03 |
| 17381779 | Rsu1          | 0.78 | 1.80E-04 | 1.80E-03 |
| 17470988 | Ptms          | 0.78 | 4.72E-04 | 3.80E-03 |
| 17361921 | Tm7sf2        | 0.78 | 1.33E-03 | 8.70E-03 |
| 17541383 | Zdhhc9        | 0.78 | 5.91E-04 | 4.52E-03 |
| 17424023 | Ndufb6        | 0.78 | 1.34E-04 | 1.43E-03 |
| 17311796 | Ndufb9        | 0.78 | 3.25E-04 | 2.84E-03 |
| 17224500 | Atg9a         | 0.77 | 5.91E-04 | 4.52E-03 |
| 17363704 | Rfx3          | 0.77 | 9.55E-04 | 6.65E-03 |
| 17244514 | Nudt4         | 0.77 | 3.42E-04 | 2.95E-03 |
| 17503756 | Rbl2          | 0.77 | 3.30E-04 | 2.87E-03 |
| 17310432 | Mtmr12        | 0.77 | 1.44E-03 | 9.23E-03 |
| 17406091 | Etfdh         | 0.77 | 4.27E-04 | 3.50E-03 |
| 17497877 | B230206H07Rik | 0.77 | 8.18E-04 | 5.86E-03 |
| 17422587 | Nadk          | 0.77 | 6.44E-04 | 4.85E-03 |
| 17464626 | Pon3          | 0.77 | 9.37E-04 | 6.56E-03 |
| 17219554 | Igsf9         | 0.77 | 2.20E-04 | 2.12E-03 |
| 17430835 | Phactr4       | 0.77 | 5.65E-04 | 4.37E-03 |
| 17503287 | Prdx2         | 0.77 | 1.23E-04 | 1.33E-03 |
| 17228751 | Rabgap1l      | 0.77 | 1.16E-03 | 7.78E-03 |
| 17411174 | Gipc2         | 0.77 | 3.54E-04 | 3.03E-03 |
| 17405133 | Ndufc1        | 0.77 | 4.21E-04 | 3.46E-03 |
| 17456053 | Tmem106b      | 0.77 | 2.79E-04 | 2.53E-03 |
| 17347680 | Zfp36l2       | 0.77 | 1.10E-03 | 7.44E-03 |
| 17281908 | Tmem30b       | 0.77 | 2.50E-04 | 2.32E-03 |
| 17235198 | Atp5d         | 0.77 | 9.14E-05 | 1.06E-03 |
| 17220255 | Cnih4         | 0.77 | 1.80E-04 | 1.80E-03 |
| 17382802 | Ubac1         | 0.77 | 1.93E-04 | 1.91E-03 |
| 17534408 | Xiap          | 0.77 | 6.46E-04 | 4.86E-03 |
| 17249440 | Vdac1         | 0.77 | 1.87E-04 | 1.86E-03 |
| 17430878 | Atpif1        | 0.77 | 8.14E-05 | 9.62E-04 |
| 17426206 | Alad          | 0.77 | 1.51E-04 | 1.57E-03 |

|          |               |      |          |          |
|----------|---------------|------|----------|----------|
| 17286595 | Rreb1         | 0.77 | 9.07E-04 | 6.38E-03 |
| 17384587 | Rc3h2         | 0.77 | 3.22E-04 | 2.82E-03 |
| 17508885 | Mtmt7         | 0.77 | 1.64E-04 | 1.68E-03 |
| 17420347 | Ece1          | 0.77 | 1.94E-04 | 1.91E-03 |
| 17495466 | Arl6ip1       | 0.77 | 2.04E-04 | 1.99E-03 |
| 17407201 | Ubp2l         | 0.77 | 1.24E-04 | 1.34E-03 |
| 17526583 | Sidt2         | 0.77 | 1.20E-03 | 7.98E-03 |
| 17404585 | Zmat3         | 0.77 | 5.27E-04 | 4.13E-03 |
| 17295907 | Nln           | 0.77 | 5.78E-04 | 4.45E-03 |
| 17245044 | Tmem19        | 0.77 | 1.14E-03 | 7.69E-03 |
| 17222326 | 6330578E17Rik | 0.77 | 1.37E-03 | 8.89E-03 |
| 17399474 | Pmvk          | 0.77 | 8.58E-04 | 6.08E-03 |
| 17414456 | Hsd12         | 0.77 | 2.31E-04 | 2.19E-03 |
| 17319465 | St13          | 0.77 | 6.52E-05 | 8.01E-04 |
| 17529713 | 2610101N10Rik | 0.77 | 7.55E-05 | 9.04E-04 |
| 17325581 | Cox17         | 0.77 | 2.16E-04 | 2.08E-03 |
| 17295038 | Scamp1        | 0.77 | 6.15E-04 | 4.67E-03 |
| 17495586 | Gde1          | 0.77 | 1.59E-03 | 9.98E-03 |
| 17368550 | Rxra          | 0.77 | 5.46E-04 | 4.25E-03 |
| 17313394 | Aco2          | 0.77 | 3.53E-04 | 3.02E-03 |
| 17471342 | Fkbp4         | 0.77 | 5.81E-04 | 4.47E-03 |
| 17495553 | Coq7          | 0.77 | 6.01E-05 | 7.55E-04 |
| 17503031 | Prkaca        | 0.77 | 7.75E-04 | 5.61E-03 |
| 17533474 | Maoa          | 0.77 | 4.69E-04 | 3.78E-03 |
| 17299703 | G630016D24Rik | 0.77 | 5.33E-04 | 4.17E-03 |
| 17413528 | Melk          | 0.77 | 2.97E-04 | 2.66E-03 |
| 17238722 | H60c          | 0.77 | 1.21E-03 | 8.04E-03 |
| 17307354 | Atp8a2        | 0.77 | 5.15E-04 | 4.06E-03 |
| 17412730 | Aco1          | 0.77 | 1.04E-04 | 1.17E-03 |
| 17427389 | Cyp2j6        | 0.76 | 1.34E-03 | 8.72E-03 |
| 17266157 | Cpd           | 0.76 | 7.29E-04 | 5.34E-03 |
| 17330323 | Nr1i2         | 0.76 | 1.30E-03 | 8.49E-03 |
| 17503507 | Lonp2         | 0.76 | 9.10E-05 | 1.06E-03 |
| 17420604 | Akr7a5        | 0.76 | 1.21E-03 | 8.04E-03 |
| 17360695 | Atrnl1        | 0.76 | 6.57E-04 | 4.92E-03 |
| 17532418 | Ano10         | 0.76 | 1.27E-03 | 8.35E-03 |
| 17225586 | Myeov2        | 0.76 | 2.16E-04 | 2.08E-03 |
| 17315635 | Ghr           | 0.76 | 1.41E-03 | 9.05E-03 |
| 17515413 | Pigyl         | 0.76 | 1.44E-03 | 9.22E-03 |
| 17246381 | Mettl7b       | 0.76 | 1.14E-03 | 7.66E-03 |
| 17498502 | Ccnd1         | 0.76 | 7.60E-05 | 9.09E-04 |
| 17407764 | Prune         | 0.76 | 1.11E-03 | 7.53E-03 |
| 17288908 | Cetn3         | 0.76 | 6.27E-04 | 4.74E-03 |
| 17510906 | Tecr          | 0.76 | 3.18E-05 | 4.64E-04 |
| 17344456 | 2310061104Rik | 0.76 | 2.39E-04 | 2.24E-03 |

|          |               |      |          |          |
|----------|---------------|------|----------|----------|
| 17261035 | Ahsa2         | 0.76 | 5.55E-04 | 4.31E-03 |
| 17304518 | 2010107H07Rik | 0.76 | 5.78E-04 | 4.45E-03 |
| 17383985 | Ttc16         | 0.76 | 9.46E-04 | 6.60E-03 |
| 17219242 | Apoa2         | 0.76 | 6.82E-04 | 5.06E-03 |
| 17210984 | Pcmt1         | 0.76 | 2.32E-04 | 2.20E-03 |
| 17513681 | Mvd           | 0.76 | 8.89E-04 | 6.28E-03 |
| 17543664 | Cited1        | 0.76 | 1.12E-03 | 7.54E-03 |
| 17229417 | Pbx1          | 0.76 | 1.18E-03 | 7.91E-03 |
| 17291374 | Mrs2          | 0.76 | 1.21E-03 | 8.02E-03 |
| 17379560 | Ctsa          | 0.76 | 1.45E-04 | 1.52E-03 |
| 17408863 | Atp5f1        | 0.76 | 3.81E-04 | 3.20E-03 |
| 17512342 | Tradd         | 0.76 | 5.11E-04 | 4.04E-03 |
| 17499310 | Tfdp1         | 0.76 | 3.46E-04 | 2.98E-03 |
| 17246310 | Dgka          | 0.76 | 6.49E-04 | 4.87E-03 |
| 17501148 | Aga           | 0.76 | 2.14E-04 | 2.07E-03 |
| 17372045 | Hoxd11        | 0.76 | 1.05E-03 | 7.20E-03 |
| 17308603 | Iitm2b        | 0.76 | 2.19E-05 | 3.47E-04 |
| 17502626 | Nr3c2         | 0.76 | 1.34E-03 | 8.71E-03 |
| 17322637 | Gm5480        | 0.76 | 8.05E-05 | 9.54E-04 |
| 17265129 | Acadvl        | 0.76 | 1.20E-04 | 1.31E-03 |
| 17389901 | Exd1          | 0.76 | 5.98E-04 | 4.57E-03 |
| 17513311 | 2310061C15Rik | 0.76 | 2.56E-04 | 2.37E-03 |
| 17420897 | Sdhb          | 0.75 | 1.38E-04 | 1.46E-03 |
| 17451536 | Mmab          | 0.75 | 1.47E-03 | 9.41E-03 |
| 17427686 | Slc35d1       | 0.75 | 1.27E-04 | 1.37E-03 |
| 17526674 | Rexo2         | 0.75 | 1.69E-04 | 1.72E-03 |
| 17286055 | Gpld1         | 0.75 | 2.49E-04 | 2.32E-03 |
| 17409893 | Slc44a3       | 0.75 | 1.29E-03 | 8.44E-03 |
| 17249811 | Slc36a1       | 0.75 | 1.35E-03 | 8.76E-03 |
| 17251634 | A030009H04Rik | 0.75 | 1.95E-04 | 1.92E-03 |
| 17249801 | Gm2a          | 0.75 | 1.54E-03 | 9.76E-03 |
| 17313619 | Serhl         | 0.75 | 2.82E-04 | 2.56E-03 |
| 17232977 | Scml4         | 0.75 | 5.01E-04 | 3.97E-03 |
| 17265186 | Rnasek        | 0.75 | 2.49E-04 | 2.32E-03 |
| 17234552 | Lss           | 0.75 | 4.47E-04 | 3.64E-03 |
| 17216727 | Slc35f5       | 0.75 | 5.44E-05 | 6.96E-04 |
| 17253616 | Pigs          | 0.75 | 1.93E-04 | 1.91E-03 |
| 17371739 | Hat1          | 0.75 | 7.02E-04 | 5.18E-03 |
| 17393095 | Sun5          | 0.75 | 1.58E-04 | 1.63E-03 |
| 17418101 | Ppt1          | 0.75 | 9.87E-05 | 1.12E-03 |
| 17301899 | Sucla2        | 0.75 | 1.02E-04 | 1.16E-03 |
| 17402283 | Gclm          | 0.75 | 1.95E-04 | 1.92E-03 |
| 17336636 | Agpat1        | 0.75 | 8.01E-05 | 9.51E-04 |
| 17342581 | Decr2         | 0.75 | 5.81E-04 | 4.47E-03 |
| 17318877 | Txn2          | 0.75 | 9.37E-04 | 6.56E-03 |

|          |               |      |          |          |
|----------|---------------|------|----------|----------|
| 17402321 | Pde5a         | 0.75 | 1.03E-03 | 7.09E-03 |
| 17269911 | Vat1          | 0.75 | 3.26E-04 | 2.84E-03 |
| 17415219 | Acer2         | 0.75 | 9.65E-04 | 6.71E-03 |
| 17280897 | Stxbp6        | 0.75 | 1.02E-03 | 7.02E-03 |
| 17261840 | Hmmr          | 0.75 | 7.63E-04 | 5.54E-03 |
| 17428735 | Urod          | 0.75 | 3.03E-04 | 2.69E-03 |
| 17456152 | Cav2          | 0.75 | 7.65E-04 | 5.55E-03 |
| 17263535 | Srebf1        | 0.75 | 2.21E-04 | 2.12E-03 |
| 17532455 | 1110059G10Rik | 0.75 | 1.39E-03 | 8.97E-03 |
| 17230735 | Mosc2         | 0.75 | 1.11E-04 | 1.23E-03 |
| 17538852 | Hsd17b10      | 0.75 | 6.00E-04 | 4.58E-03 |
| 17215647 | Prlh          | 0.75 | 4.86E-04 | 3.88E-03 |
| 17323440 | Tmem191c      | 0.75 | 9.38E-04 | 6.56E-03 |
| 17506030 | Hsd17b2       | 0.75 | 8.51E-05 | 9.99E-04 |
| 17313739 | Prr5          | 0.75 | 6.21E-04 | 4.71E-03 |
| 17370273 | Ndufa8        | 0.75 | 1.66E-04 | 1.70E-03 |
| 17214904 | C130026I21Rik | 0.75 | 2.60E-04 | 2.40E-03 |
| 17489768 | Tdrd12        | 0.75 | 8.19E-04 | 5.87E-03 |
| 17406656 | Apoa1bp       | 0.75 | 1.45E-04 | 1.52E-03 |
| 17255727 | Osbp17        | 0.75 | 5.17E-04 | 4.08E-03 |
| 17465201 | Ndufa5        | 0.75 | 9.45E-05 | 1.09E-03 |
| 17242924 | Uqcr11        | 0.75 | 1.10E-03 | 7.48E-03 |
| 17312511 | Adck5         | 0.75 | 7.26E-04 | 5.32E-03 |
| 17253996 | Tmem98        | 0.75 | 3.82E-04 | 3.20E-03 |
| 17450142 | Hpse          | 0.75 | 2.12E-04 | 2.05E-03 |
| 17277294 | Isca2         | 0.75 | 8.42E-05 | 9.91E-04 |
| 17435455 | 2900005J15Rik | 0.75 | 4.71E-04 | 3.79E-03 |
| 17336077 | Zfp955b       | 0.75 | 5.38E-04 | 4.21E-03 |
| 17398272 | Arl14         | 0.75 | 4.34E-04 | 3.55E-03 |
| 17477116 | Etfb          | 0.75 | 5.48E-05 | 7.00E-04 |
| 17456604 | Ccdc136       | 0.75 | 3.16E-04 | 2.78E-03 |
| 17267430 | Gdpd1         | 0.75 | 2.05E-04 | 2.00E-03 |
| 17374569 | Bub1b         | 0.75 | 1.58E-03 | 9.98E-03 |
| 17342770 | Spdef         | 0.74 | 4.90E-04 | 3.90E-03 |
| 17542419 | L1cam         | 0.74 | 1.33E-03 | 8.70E-03 |
| 17502816 | Inpp4b        | 0.74 | 4.20E-04 | 3.45E-03 |
| 17521996 | Uqcrc1        | 0.74 | 5.09E-05 | 6.57E-04 |
| 17411547 | Chchd7        | 0.74 | 9.24E-04 | 6.49E-03 |
| 17447310 | Lrpap1        | 0.74 | 3.01E-04 | 2.69E-03 |
| 17323589 | Klhl22        | 0.74 | 9.40E-04 | 6.57E-03 |
| 17247519 | Spred2        | 0.74 | 3.71E-04 | 3.14E-03 |
| 17238605 | Itga7         | 0.74 | 4.64E-04 | 3.75E-03 |
| 17276743 | Plekhh1       | 0.74 | 2.32E-04 | 2.20E-03 |
| 17373984 | Immp1l        | 0.74 | 5.46E-04 | 4.25E-03 |
| 17347114 | Capn13        | 0.74 | 1.11E-03 | 7.51E-03 |

|          |               |      |          |          |
|----------|---------------|------|----------|----------|
| 17303757 | Dnajc9        | 0.74 | 2.45E-04 | 2.29E-03 |
| 17249425 | Skp1a         | 0.74 | 3.91E-04 | 3.26E-03 |
| 17447128 | Slbp          | 0.74 | 1.41E-03 | 9.06E-03 |
| 17286927 | Jarid2        | 0.74 | 8.21E-04 | 5.87E-03 |
| 17305967 | Ttc5          | 0.74 | 6.32E-04 | 4.78E-03 |
| 17217127 | Nucks1        | 0.74 | 1.06E-04 | 1.19E-03 |
| 17464040 | Pde3a         | 0.74 | 7.51E-04 | 5.46E-03 |
| 17262516 | O610009B22Rik | 0.74 | 3.31E-04 | 2.88E-03 |
| 17347751 | Lrpprc        | 0.74 | 1.42E-04 | 1.50E-03 |
| 17493298 | Tmem126b      | 0.74 | 7.03E-04 | 5.19E-03 |
| 17399519 | Ube2q1        | 0.74 | 6.22E-04 | 4.71E-03 |
| 17424163 | Ubap2         | 0.74 | 8.92E-05 | 1.04E-03 |
| 17448832 | Lrrc66        | 0.74 | 1.99E-04 | 1.95E-03 |
| 17439563 | Enoph1        | 0.74 | 2.86E-04 | 2.58E-03 |
| 17413852 | Galnt12       | 0.74 | 8.06E-04 | 5.80E-03 |
| 17468157 | Tet3          | 0.74 | 3.09E-04 | 2.74E-03 |
| 17213338 | Fam117b       | 0.74 | 2.21E-04 | 2.12E-03 |
| 17468798 | Mcm2          | 0.74 | 2.45E-04 | 2.29E-03 |
| 17440826 | Acacb         | 0.74 | 7.34E-04 | 5.36E-03 |
| 17235379 | Csnk1g2       | 0.74 | 3.21E-05 | 4.68E-04 |
| 17389836 | Ppp1r14d      | 0.74 | 6.95E-05 | 8.41E-04 |
| 17305163 | 2610528A11Rik | 0.74 | 4.63E-05 | 6.18E-04 |
| 17328829 | Slc25a1       | 0.74 | 5.67E-05 | 7.17E-04 |
| 17403126 | Adh5          | 0.74 | 2.77E-04 | 2.52E-03 |
| 17413352 | Car9          | 0.74 | 4.63E-05 | 6.18E-04 |
| 17265422 | C1qbp         | 0.74 | 7.92E-04 | 5.70E-03 |
| 17394829 | Atp9a         | 0.74 | 1.53E-04 | 1.59E-03 |
| 17243034 | Mknk2         | 0.74 | 1.20E-04 | 1.31E-03 |
| 17518172 | Anp32a        | 0.74 | 2.40E-05 | 3.73E-04 |
| 17504293 | Mmp15         | 0.74 | 5.83E-05 | 7.34E-04 |
| 17343035 | Mtch1         | 0.74 | 2.12E-05 | 3.38E-04 |
| 17213990 | Atic          | 0.74 | 3.41E-04 | 2.95E-03 |
| 17214883 | Fbxo36        | 0.74 | 4.37E-04 | 3.57E-03 |
| 17548428 | Uqcrb         | 0.74 | 3.45E-04 | 2.97E-03 |
| 17402025 | Dbt           | 0.74 | 2.84E-04 | 2.57E-03 |
| 17527735 | Neo1          | 0.74 | 3.72E-04 | 3.15E-03 |
| 17455882 | Ppp1r9a       | 0.74 | 1.59E-03 | 9.98E-03 |
| 17495985 | Gm20299       | 0.74 | 8.06E-04 | 5.80E-03 |
| 17339108 | Man2a1        | 0.74 | 2.28E-04 | 2.17E-03 |
| 17342595 | Nme4          | 0.74 | 1.39E-03 | 8.99E-03 |
| 17530159 | Ppp2r3a       | 0.74 | 1.07E-03 | 7.31E-03 |
| 17462905 | Lpcat3        | 0.74 | 3.72E-05 | 5.22E-04 |
| 17312551 | Ppp1r16a      | 0.74 | 5.36E-05 | 6.87E-04 |
| 17241623 | Reep3         | 0.74 | 7.23E-04 | 5.30E-03 |
| 17241228 | Eif4ebp2      | 0.74 | 3.84E-05 | 5.37E-04 |

|          |               |      |          |          |
|----------|---------------|------|----------|----------|
| 17280086 | Greb1         | 0.74 | 4.64E-04 | 3.75E-03 |
| 17526363 | Tmem25        | 0.74 | 4.64E-04 | 3.75E-03 |
| 17289455 | Serf1         | 0.74 | 2.84E-04 | 2.57E-03 |
| 17506479 | Spg7          | 0.74 | 6.35E-04 | 4.80E-03 |
| 17282104 | Atp6v1d       | 0.73 | 1.17E-04 | 1.29E-03 |
| 17397129 | Fgf2          | 0.73 | 1.63E-04 | 1.67E-03 |
| 17261865 | Ccng1         | 0.73 | 2.15E-05 | 3.43E-04 |
| 17354764 | Arhgef37      | 0.73 | 8.09E-05 | 9.58E-04 |
| 17512716 | Terf2         | 0.73 | 6.64E-04 | 4.96E-03 |
| 17321645 | Lima1         | 0.73 | 4.21E-05 | 5.74E-04 |
| 17225564 | Ndufa10       | 0.73 | 4.73E-05 | 6.27E-04 |
| 17362216 | Nudt22        | 0.73 | 5.99E-04 | 4.57E-03 |
| 17386135 | Stk39         | 0.73 | 1.39E-03 | 8.99E-03 |
| 17350740 | Lmnb1         | 0.73 | 1.20E-04 | 1.31E-03 |
| 17367036 | Pter          | 0.73 | 2.91E-04 | 2.62E-03 |
| 17511389 | Itfg1         | 0.73 | 3.09E-05 | 4.54E-04 |
| 17536600 | Gdpd2         | 0.73 | 1.22E-03 | 8.10E-03 |
| 17338445 | Unc5cl        | 0.73 | 7.50E-04 | 5.45E-03 |
| 17291767 | Tubb2a        | 0.73 | 1.50E-04 | 1.57E-03 |
| 17249362 | Sar1b         | 0.73 | 1.06E-04 | 1.18E-03 |
| 17502011 | Gm3336        | 0.73 | 2.40E-04 | 2.25E-03 |
| 17225775 | Thap4         | 0.73 | 2.90E-05 | 4.32E-04 |
| 17230174 | Chml          | 0.73 | 1.41E-03 | 9.05E-03 |
| 17531168 | Dag1          | 0.73 | 1.82E-04 | 1.82E-03 |
| 17281063 | 6530401N04Rik | 0.73 | 8.07E-04 | 5.80E-03 |
| 17537190 | Sh3bgrl       | 0.73 | 5.70E-04 | 4.41E-03 |
| 17253630 | Unc119        | 0.73 | 1.54E-03 | 9.79E-03 |
| 17428217 | Cdkn2c        | 0.73 | 9.87E-04 | 6.83E-03 |
| 17451972 | Plbd2         | 0.73 | 2.13E-04 | 2.06E-03 |
| 17391608 | Idh3b         | 0.73 | 7.31E-05 | 8.79E-04 |
| 17398180 | Mfsd1         | 0.73 | 3.26E-04 | 2.85E-03 |
| 17526861 | Dlat          | 0.73 | 6.97E-05 | 8.43E-04 |
| 17421120 | Casp9         | 0.73 | 2.59E-04 | 2.39E-03 |
| 17541618 | Mbnl3         | 0.73 | 2.97E-04 | 2.66E-03 |
| 17264562 | Cntrob        | 0.73 | 3.69E-04 | 3.13E-03 |
| 17480216 | Prcp          | 0.73 | 1.21E-04 | 1.32E-03 |
| 17527353 | Etfa          | 0.73 | 2.01E-05 | 3.24E-04 |
| 17469879 | Timp4         | 0.73 | 1.27E-03 | 8.33E-03 |
| 17447904 | Qdpr          | 0.73 | 4.44E-04 | 3.62E-03 |
| 17468551 | Anxa4         | 0.73 | 8.06E-06 | 1.54E-04 |
| 17260357 | H2afv         | 0.73 | 1.06E-03 | 7.27E-03 |
| 17222332 | Mgat4a        | 0.73 | 2.13E-05 | 3.39E-04 |
| 17251994 | Slc16a11      | 0.73 | 2.33E-04 | 2.20E-03 |
| 17475251 | Megf8         | 0.73 | 4.50E-05 | 6.04E-04 |
| 17497595 | 1810014F10Rik | 0.73 | 1.42E-03 | 9.12E-03 |

|          |               |      |          |          |
|----------|---------------|------|----------|----------|
| 17304203 | Slmap         | 0.73 | 1.85E-05 | 3.04E-04 |
| 17409463 | Fam102b       | 0.73 | 1.69E-04 | 1.72E-03 |
| 17291570 | Uqcrfs1       | 0.73 | 4.14E-05 | 5.68E-04 |
| 17439557 | Hnrnpd        | 0.73 | 1.30E-03 | 8.49E-03 |
| 17485339 | Slc22a18      | 0.73 | 1.05E-05 | 1.92E-04 |
| 17502729 | Zfp827        | 0.73 | 3.05E-04 | 2.71E-03 |
| 17538297 | Tmem164       | 0.72 | 8.76E-04 | 6.20E-03 |
| 17515340 | Rab3d         | 0.72 | 1.22E-04 | 1.32E-03 |
| 17467154 | Ppm1k         | 0.72 | 3.14E-04 | 2.76E-03 |
| 17527678 | Pml           | 0.72 | 2.77E-04 | 2.52E-03 |
| 17468961 | Nup210        | 0.72 | 1.53E-04 | 1.59E-03 |
| 17360312 | Add3          | 0.72 | 5.23E-04 | 4.11E-03 |
| 17288463 | Mrpl36        | 0.72 | 1.01E-03 | 6.96E-03 |
| 17433631 | Prdm16        | 0.72 | 3.27E-04 | 2.85E-03 |
| 17325637 | B4galt4       | 0.72 | 5.93E-04 | 4.53E-03 |
| 17523281 | Trak1         | 0.72 | 1.21E-04 | 1.32E-03 |
| 17409920 | Abcd3         | 0.72 | 4.91E-05 | 6.43E-04 |
| 17300984 | Cab39l        | 0.72 | 2.74E-04 | 2.50E-03 |
| 17329937 | Umps          | 0.72 | 3.44E-04 | 2.97E-03 |
| 17409753 | Agl           | 0.72 | 1.06E-04 | 1.18E-03 |
| 17518636 | 2810417H13Rik | 0.72 | 1.21E-03 | 8.04E-03 |
| 17520932 | Topbp1        | 0.72 | 3.50E-05 | 4.98E-04 |
| 17307588 | Fdft1         | 0.72 | 1.51E-05 | 2.58E-04 |
| 17423701 | Fut9          | 0.72 | 5.85E-05 | 7.36E-04 |
| 17402595 | Casp6         | 0.72 | 4.93E-05 | 6.44E-04 |
| 17375767 | Blvra         | 0.72 | 3.24E-04 | 2.83E-03 |
| 17342625 | Itfg3         | 0.72 | 1.26E-03 | 8.28E-03 |
| 17359531 | Marveld1      | 0.72 | 1.26E-03 | 8.28E-03 |
| 17247471 | C1d           | 0.72 | 5.64E-05 | 7.15E-04 |
| 17455507 | Hsph1         | 0.72 | 1.08E-03 | 7.37E-03 |
| 17343735 | H2-Ke6        | 0.72 | 3.77E-04 | 3.18E-03 |
| 17535930 | Dkc1          | 0.72 | 4.03E-04 | 3.34E-03 |
| 17493185 | Tmem135       | 0.72 | 3.99E-04 | 3.31E-03 |
| 17256033 | Grb7          | 0.72 | 7.93E-05 | 9.42E-04 |
| 17373086 | Mtch2         | 0.72 | 3.21E-05 | 4.68E-04 |
| 17424515 | Fancg         | 0.72 | 2.98E-04 | 2.66E-03 |
| 17240901 | D630037F22Rik | 0.72 | 4.59E-04 | 3.73E-03 |
| 17453383 | Clip2         | 0.72 | 1.57E-04 | 1.62E-03 |
| 17284222 | Ahnak2        | 0.72 | 5.08E-04 | 4.02E-03 |
| 17509537 | Palld         | 0.72 | 2.23E-04 | 2.14E-03 |
| 17300672 | Nfatc4        | 0.72 | 8.57E-04 | 6.08E-03 |
| 17537895 | Ngfrap1       | 0.72 | 2.23E-04 | 2.13E-03 |
| 17491259 | Uevld         | 0.72 | 5.08E-05 | 6.57E-04 |
| 17327544 | Bace2         | 0.72 | 2.16E-04 | 2.08E-03 |
| 17431867 | Minos1        | 0.72 | 3.66E-04 | 3.11E-03 |



|          |               |      |          |          |
|----------|---------------|------|----------|----------|
| 17258287 | 2310067B10Rik | 0.72 | 2.34E-04 | 2.21E-03 |
| 17229629 | Sdhc          | 0.72 | 5.62E-05 | 7.14E-04 |
| 17337142 | H2-Q10        | 0.72 | 7.02E-04 | 5.19E-03 |
| 17402756 | Ppa2          | 0.72 | 2.25E-04 | 2.15E-03 |
| 17531834 | Fbxl2         | 0.72 | 4.65E-04 | 3.76E-03 |
| 17282117 | Plek2         | 0.72 | 1.31E-05 | 2.31E-04 |
| 17399783 | S100a16       | 0.72 | 1.17E-03 | 7.81E-03 |
| 17241912 | Ddt           | 0.72 | 7.52E-04 | 5.46E-03 |
| 17331059 | Gpr128        | 0.72 | 1.62E-05 | 2.76E-04 |
| 17376917 | 2310003L22Rik | 0.72 | 9.43E-04 | 6.59E-03 |
| 17510129 | Mpv17l2       | 0.72 | 3.12E-05 | 4.57E-04 |
| 17319554 | Pmm1          | 0.72 | 1.25E-03 | 8.25E-03 |
| 17287414 | Sfxn1         | 0.72 | 1.20E-04 | 1.31E-03 |
| 17546222 | Tmlhe         | 0.72 | 3.80E-04 | 3.20E-03 |
| 17369555 | Abl1          | 0.72 | 8.25E-04 | 5.89E-03 |
| 17468933 | lqsec1        | 0.72 | 2.09E-04 | 2.03E-03 |
| 17493632 | Dgat2         | 0.71 | 1.29E-04 | 1.39E-03 |
| 17294377 | Sdha          | 0.71 | 1.60E-05 | 2.72E-04 |
| 17404329 | Gyg           | 0.71 | 2.94E-04 | 2.64E-03 |
| 17216158 | Fam174a       | 0.71 | 5.42E-04 | 4.23E-03 |
| 17242879 | Adamtsl5      | 0.71 | 1.04E-04 | 1.18E-03 |
| 17514732 | Sesn3         | 0.71 | 3.37E-04 | 2.92E-03 |
| 17229403 | Mgst3         | 0.71 | 1.31E-05 | 2.30E-04 |
| 17272262 | Evpl          | 0.71 | 4.41E-04 | 3.60E-03 |
| 17221633 | Mcm3          | 0.71 | 6.56E-04 | 4.91E-03 |
| 17272241 | Acox1         | 0.71 | 2.50E-05 | 3.84E-04 |
| 17321263 | Adcy6         | 0.71 | 1.18E-04 | 1.29E-03 |
| 17409981 | 4930447N08Rik | 0.71 | 9.81E-04 | 6.80E-03 |
| 17477979 | Dbp           | 0.71 | 9.18E-04 | 6.45E-03 |
| 17459038 | Herc3         | 0.71 | 5.36E-04 | 4.20E-03 |
| 17348356 | Snrpd1        | 0.71 | 8.18E-04 | 5.86E-03 |
| 17482739 | Plk1          | 0.71 | 2.06E-05 | 3.31E-04 |
| 17510120 | Pgpep1        | 0.71 | 8.51E-04 | 6.05E-03 |
| 17516030 | Tmem218       | 0.71 | 6.19E-04 | 4.69E-03 |
| 17412067 | Fam82b        | 0.71 | 1.39E-03 | 8.97E-03 |
| 17501609 | Ints10        | 0.71 | 2.08E-04 | 2.02E-03 |
| 17287772 | Pcbd2         | 0.71 | 3.52E-05 | 5.00E-04 |
| 17417269 | 4732418C07Rik | 0.71 | 1.30E-04 | 1.40E-03 |
| 17480568 | Arrb1         | 0.71 | 9.66E-05 | 1.11E-03 |
| 17377666 | Srxn1         | 0.71 | 1.54E-04 | 1.60E-03 |
| 17545910 | Grpr          | 0.71 | 1.57E-03 | 9.95E-03 |
| 17532030 | Cmc1          | 0.71 | 4.94E-05 | 6.45E-04 |
| 17498370 | Nadsyn1       | 0.71 | 4.87E-04 | 3.89E-03 |
| 17241692 | Cdk1          | 0.71 | 2.76E-04 | 2.52E-03 |
| 17422117 | Acot7         | 0.71 | 3.98E-04 | 3.31E-03 |

|          |               |      |          |          |
|----------|---------------|------|----------|----------|
| 17537889 | Wbp5          | 0.71 | 8.71E-04 | 6.17E-03 |
| 17292084 | 9530008L14Rik | 0.71 | 9.35E-05 | 1.08E-03 |
| 17295796 | Pik3r1        | 0.71 | 9.94E-05 | 1.13E-03 |
| 17403514 | Ssx2ip        | 0.71 | 9.32E-05 | 1.08E-03 |
| 17400048 | Rorc          | 0.71 | 1.06E-03 | 7.23E-03 |
| 17334205 | Abca3         | 0.71 | 2.25E-04 | 2.15E-03 |
| 17539467 | Ap1s2         | 0.71 | 1.27E-03 | 8.36E-03 |
| 17384334 | Phf19         | 0.71 | 1.50E-03 | 9.55E-03 |
| 17458327 | Repin1        | 0.71 | 2.80E-05 | 4.21E-04 |
| 17475026 | Ethe1         | 0.71 | 2.04E-05 | 3.29E-04 |
| 17225627 | 9430060I03Rik | 0.71 | 8.04E-04 | 5.78E-03 |
| 17417107 | 9130206I24Rik | 0.71 | 1.57E-04 | 1.63E-03 |
| 17446587 | Lmbr1         | 0.71 | 1.59E-04 | 1.64E-03 |
| 17508464 | 4930444A02Rik | 0.71 | 7.50E-04 | 5.45E-03 |
| 17392730 | Abhd12        | 0.71 | 5.03E-05 | 6.55E-04 |
| 17396315 | Tbl1xr1       | 0.71 | 1.89E-04 | 1.87E-03 |
| 17347475 | Hnrpll        | 0.71 | 7.62E-05 | 9.10E-04 |
| 17450741 | Atp5k         | 0.71 | 8.28E-06 | 1.58E-04 |
| 17260944 | Mdh1          | 0.71 | 2.39E-05 | 3.71E-04 |
| 17327236 | Clic6         | 0.71 | 6.14E-04 | 4.67E-03 |
| 17404750 | Mccc1         | 0.71 | 2.10E-04 | 2.03E-03 |
| 17484068 | Lhpp          | 0.71 | 1.59E-03 | 9.98E-03 |
| 17282563 | Npc2          | 0.71 | 1.10E-05 | 2.01E-04 |
| 17337719 | Mut           | 0.71 | 4.87E-04 | 3.89E-03 |
| 17455307 | Cdx2          | 0.71 | 4.15E-04 | 3.42E-03 |
| 17334922 | Neurl1b       | 0.71 | 1.17E-03 | 7.81E-03 |
| 17409721 | Hiat1         | 0.71 | 3.86E-04 | 3.23E-03 |
| 17268817 | LOC100862101  | 0.71 | 2.35E-05 | 3.68E-04 |
| 17325159 | Mylk          | 0.71 | 1.19E-04 | 1.30E-03 |
| 17423037 | Impad1        | 0.71 | 2.24E-04 | 2.15E-03 |
| 17257444 | Ace           | 0.71 | 7.49E-04 | 5.45E-03 |
| 17439766 | LOC100861848  | 0.71 | 4.86E-05 | 6.38E-04 |
| 17519778 | LOC100862063  | 0.71 | 7.01E-06 | 1.38E-04 |
| 17510145 | Pik3r2        | 0.70 | 1.22E-03 | 8.09E-03 |
| 17515641 | Al414108      | 0.70 | 1.25E-03 | 8.25E-03 |
| 17277195 | Ptgr2         | 0.70 | 4.85E-04 | 3.88E-03 |
| 17467166 | Pigy          | 0.70 | 3.40E-04 | 2.94E-03 |
| 17446643 | Hadha         | 0.70 | 6.08E-05 | 7.60E-04 |
| 17396439 | Tnik          | 0.70 | 3.44E-04 | 2.97E-03 |
| 17381573 | Atp5c1        | 0.70 | 7.25E-05 | 8.73E-04 |
| 17213548 | Nrp2          | 0.70 | 4.57E-05 | 6.12E-04 |
| 17310837 | Sema5a        | 0.70 | 1.21E-04 | 1.32E-03 |
| 17243638 | Mterfd3       | 0.70 | 7.04E-04 | 5.20E-03 |
| 17535627 | Abcd1         | 0.70 | 1.38E-03 | 8.95E-03 |
| 17348933 | Mapre2        | 0.70 | 3.59E-05 | 5.07E-04 |

|          |               |      |          |          |
|----------|---------------|------|----------|----------|
| 17217136 | Slc45a3       | 0.70 | 4.22E-04 | 3.46E-03 |
| 17483084 | Mapk3         | 0.70 | 6.50E-06 | 1.32E-04 |
| 17451649 | Acads         | 0.70 | 1.90E-05 | 3.10E-04 |
| 17281419 | Fkbp3         | 0.70 | 1.96E-04 | 1.92E-03 |
| 17222606 | Mfsd9         | 0.70 | 4.57E-04 | 3.71E-03 |
| 17315718 | Ptger4        | 0.70 | 1.38E-03 | 8.92E-03 |
| 17366141 | Prdx3         | 0.70 | 4.84E-05 | 6.37E-04 |
| 17460941 | Slc6a6        | 0.70 | 4.38E-05 | 5.94E-04 |
| 17528673 | Myzap         | 0.70 | 3.48E-04 | 2.99E-03 |
| 17467575 | Thnsl2        | 0.70 | 6.01E-05 | 7.55E-04 |
| 17386700 | Nfe2l2        | 0.70 | 5.58E-06 | 1.19E-04 |
| 17217155 | Mfsd4         | 0.70 | 5.33E-05 | 6.84E-04 |
| 17327223 | Fam165b       | 0.70 | 1.24E-04 | 1.34E-03 |
| 17240598 | 1700021F05Rik | 0.70 | 4.00E-05 | 5.54E-04 |
| 17232332 | Arhgap18      | 0.70 | 6.28E-06 | 1.30E-04 |
| 17339991 | Eml4          | 0.70 | 6.87E-06 | 1.36E-04 |
| 17259810 | Inpp5j        | 0.70 | 5.56E-05 | 7.08E-04 |
| 17443818 | 0910001L09Rik | 0.70 | 3.92E-04 | 3.27E-03 |
| 17282743 | Tgfb3         | 0.70 | 1.39E-03 | 8.97E-03 |
| 17280310 | Id2           | 0.70 | 6.12E-05 | 7.64E-04 |
| 17233039 | Rtn4ip1       | 0.70 | 2.19E-04 | 2.10E-03 |
| 17251746 | 1810027O10Rik | 0.70 | 1.33E-04 | 1.42E-03 |
| 17396056 | Fabp5         | 0.70 | 3.88E-04 | 3.24E-03 |
| 17518458 | Igdcc4        | 0.70 | 1.35E-04 | 1.43E-03 |
| 17300998 | Shisa2        | 0.70 | 4.56E-04 | 3.70E-03 |
| 17333347 | Sod2          | 0.70 | 1.05E-04 | 1.18E-03 |
| 17336199 | Cd320         | 0.70 | 1.58E-03 | 9.96E-03 |
| 17352212 | Zadh2         | 0.70 | 3.32E-05 | 4.80E-04 |
| 17344200 | Ly6g6d        | 0.70 | 3.80E-04 | 3.20E-03 |
| 17508445 | Hgsnat        | 0.70 | 1.07E-03 | 7.28E-03 |
| 17278345 | Glr5          | 0.70 | 1.78E-05 | 2.95E-04 |
| 17451171 | Hscb          | 0.70 | 2.57E-04 | 2.38E-03 |
| 17380222 | Pck1          | 0.70 | 1.52E-03 | 9.66E-03 |
| 17404821 | Ccna2         | 0.70 | 1.02E-05 | 1.88E-04 |
| 17382363 | Noxa1         | 0.70 | 3.00E-04 | 2.68E-03 |
| 17252767 | 1300001I01Rik | 0.70 | 6.01E-04 | 4.58E-03 |
| 17432227 | Fblim1        | 0.70 | 3.33E-05 | 4.80E-04 |
| 17519910 | Ttk           | 0.70 | 3.91E-04 | 3.26E-03 |
| 17469089 | Mrps25        | 0.70 | 5.42E-04 | 4.23E-03 |
| 17375841 | Stard7        | 0.70 | 6.08E-05 | 7.60E-04 |
| 17514135 | Egln1         | 0.70 | 3.95E-05 | 5.49E-04 |
| 17453935 | Zan           | 0.70 | 4.86E-04 | 3.88E-03 |
| 17282021 | Al463170      | 0.70 | 2.86E-05 | 4.28E-04 |
| 17539560 | Asb11         | 0.70 | 8.91E-04 | 6.29E-03 |
| 17372614 | Timm10        | 0.70 | 7.25E-05 | 8.73E-04 |

|          |               |      |          |          |
|----------|---------------|------|----------|----------|
| 17319150 | Baiap2l2      | 0.70 | 2.00E-04 | 1.96E-03 |
| 17233811 | Dna2          | 0.70 | 3.47E-04 | 2.98E-03 |
| 17425566 | Ptpn3         | 0.69 | 4.18E-05 | 5.72E-04 |
| 17242046 | Dip2a         | 0.69 | 1.30E-05 | 2.29E-04 |
| 17395897 | Znf512b       | 0.69 | 4.93E-06 | 1.08E-04 |
| 17473367 | Suv420h2      | 0.69 | 1.05E-03 | 7.19E-03 |
| 17381791 | Cubn          | 0.69 | 3.69E-04 | 3.13E-03 |
| 17360462 | Acsf5         | 0.69 | 1.43E-05 | 2.48E-04 |
| 17252887 | Rpa1          | 0.69 | 1.70E-04 | 1.73E-03 |
| 17543587 | Zmym3         | 0.69 | 8.04E-04 | 5.78E-03 |
| 17371847 | Pdk1          | 0.69 | 5.64E-04 | 4.37E-03 |
| 17434475 | Hspa8         | 0.69 | 1.68E-06 | 4.69E-05 |
| 17448376 | 9130230L23Rik | 0.69 | 2.60E-05 | 3.96E-04 |
| 17509083 | Fam149a       | 0.69 | 2.56E-04 | 2.37E-03 |
| 17503397 | Man2b1        | 0.69 | 1.17E-04 | 1.29E-03 |
| 17265156 | Slc16a13      | 0.69 | 3.10E-04 | 2.74E-03 |
| 17414861 | C630043F03Rik | 0.69 | 1.60E-04 | 1.65E-03 |
| 17450366 | Hsd17b11      | 0.69 | 7.90E-06 | 1.51E-04 |
| 17375641 | Dut           | 0.69 | 9.66E-05 | 1.11E-03 |
| 17339840 | Ccdc75        | 0.69 | 7.46E-05 | 8.94E-04 |
| 17520905 | Slco2a1       | 0.69 | 3.47E-04 | 2.99E-03 |
| 17259374 | Mrpl12        | 0.69 | 2.48E-05 | 3.81E-04 |
| 17424319 | Sigmar1       | 0.69 | 1.73E-04 | 1.75E-03 |
| 17432256 | Slc25a34      | 0.69 | 2.81E-04 | 2.55E-03 |
| 17261944 | Pttg1         | 0.69 | 3.46E-05 | 4.95E-04 |
| 17330523 | Atp6v1a       | 0.69 | 2.54E-05 | 3.88E-04 |
| 17428659 | Nasp          | 0.69 | 2.17E-05 | 3.45E-04 |
| 17397360 | D3Ert751e     | 0.69 | 5.87E-04 | 4.50E-03 |
| 17329105 | Abcc5         | 0.69 | 1.36E-04 | 1.44E-03 |
| 17374648 | Ivd           | 0.69 | 1.31E-03 | 8.59E-03 |
| 17255534 | Hoxb13        | 0.69 | 7.39E-05 | 8.87E-04 |
| 17219848 | Exo1          | 0.69 | 1.27E-04 | 1.37E-03 |
| 17360440 | Adra2a        | 0.69 | 1.03E-04 | 1.17E-03 |
| 17313926 | Gramd4        | 0.69 | 1.11E-03 | 7.51E-03 |
| 17385272 | Arl5a         | 0.69 | 1.26E-05 | 2.23E-04 |
| 17247225 | Upp1          | 0.69 | 6.45E-05 | 7.94E-04 |
| 17361352 | Ccs           | 0.69 | 4.09E-05 | 5.64E-04 |
| 17273447 | Sectm1b       | 0.69 | 6.14E-05 | 7.66E-04 |
| 17293607 | Ptch1         | 0.69 | 1.75E-04 | 1.76E-03 |
| 17225785 | Dtymk         | 0.69 | 9.00E-05 | 1.05E-03 |
| 17466397 | Epha1         | 0.69 | 5.81E-05 | 7.32E-04 |
| 17494596 | Tpp1          | 0.69 | 8.71E-06 | 1.64E-04 |
| 17525263 | Aplp2         | 0.69 | 1.64E-05 | 2.78E-04 |
| 17410578 | Gm16500       | 0.69 | 3.20E-04 | 2.80E-03 |
| 17515617 | Igsf9b        | 0.69 | 2.63E-05 | 3.99E-04 |

|          |               |      |          |          |
|----------|---------------|------|----------|----------|
| 17279724 | Macc1         | 0.69 | 1.50E-04 | 1.57E-03 |
| 17436345 | Depdc5        | 0.69 | 6.75E-04 | 5.02E-03 |
| 17418592 | Clspn         | 0.69 | 4.03E-04 | 3.34E-03 |
| 17458734 | Plekha8       | 0.69 | 1.64E-04 | 1.68E-03 |
| 17541036 | Ndufa1        | 0.68 | 5.82E-06 | 1.22E-04 |
| 17457960 | Tas2r143      | 0.68 | 7.86E-04 | 5.67E-03 |
| 17255543 | Gm53          | 0.68 | 1.21E-04 | 1.32E-03 |
| 17317327 | Mtss1         | 0.68 | 2.44E-06 | 6.14E-05 |
| 17318617 | Tonsl         | 0.68 | 2.38E-04 | 2.24E-03 |
| 17301262 | Rp1l1         | 0.68 | 4.65E-04 | 3.76E-03 |
| 17506398 | 9330133O14Rik | 0.68 | 4.72E-05 | 6.26E-04 |
| 17527520 | Scamp5        | 0.68 | 3.94E-05 | 5.48E-04 |
| 17411081 | Prkacb        | 0.68 | 2.27E-05 | 3.57E-04 |
| 17242207 | Pcbp3         | 0.68 | 1.20E-03 | 7.98E-03 |
| 17464146 | Cmas          | 0.68 | 2.52E-06 | 6.29E-05 |
| 17496645 | Dctpp1        | 0.68 | 1.84E-04 | 1.84E-03 |
| 17397475 | Mgst2         | 0.68 | 9.82E-06 | 1.82E-04 |
| 17354810 | Afap1l1       | 0.68 | 8.45E-05 | 9.93E-04 |
| 17255999 | Erbp2         | 0.68 | 1.92E-05 | 3.13E-04 |
| 17300251 | Abhd4         | 0.68 | 2.63E-04 | 2.42E-03 |
| 17507668 | 2410022L05Rik | 0.68 | 2.27E-04 | 2.17E-03 |
| 17495373 | Plekha7       | 0.68 | 2.07E-04 | 2.01E-03 |
| 17481087 | Stim1         | 0.68 | 5.48E-05 | 7.00E-04 |
| 17517001 | Usp28         | 0.68 | 1.09E-03 | 7.41E-03 |
| 17402072 | Frrs1         | 0.68 | 3.23E-05 | 4.69E-04 |
| 17274099 | Fam49a        | 0.68 | 7.09E-04 | 5.23E-03 |
| 17303568 | Thoc7         | 0.68 | 4.62E-06 | 1.02E-04 |
| 17233001 | Pdss2         | 0.68 | 1.10E-03 | 7.47E-03 |
| 17363790 | Insl6         | 0.68 | 9.98E-04 | 6.90E-03 |
| 17501104 | Dctd          | 0.68 | 1.95E-04 | 1.92E-03 |
| 17463051 | Lpar5         | 0.68 | 6.37E-05 | 7.88E-04 |
| 17358682 | Minpp1        | 0.68 | 8.87E-05 | 1.04E-03 |
| 17425043 | Trim14        | 0.68 | 3.48E-04 | 2.99E-03 |
| 17431478 | Grhl3         | 0.68 | 2.16E-04 | 2.08E-03 |
| 17386757 | Prkra         | 0.68 | 7.10E-05 | 8.57E-04 |
| 17267584 | Akap1         | 0.68 | 3.94E-05 | 5.48E-04 |
| 17273200 | Pcyt2         | 0.68 | 2.98E-04 | 2.67E-03 |
| 17374245 | Slc12a6       | 0.68 | 4.53E-04 | 3.68E-03 |
| 17217116 | Rab7l1        | 0.68 | 9.30E-05 | 1.08E-03 |
| 17350364 | LOC100861902  | 0.68 | 8.23E-05 | 9.72E-04 |
| 17521422 | Hyal2         | 0.68 | 4.36E-05 | 5.92E-04 |
| 17529169 | Cox7a2        | 0.68 | 2.10E-06 | 5.51E-05 |
| 17226550 | Mcm6          | 0.68 | 1.61E-05 | 2.74E-04 |
| 17356041 | Acy3          | 0.68 | 3.14E-05 | 4.60E-04 |
| 17230153 | Fh1           | 0.68 | 6.39E-06 | 1.31E-04 |

|          |               |      |          |          |
|----------|---------------|------|----------|----------|
| 17287466 | Higd2a        | 0.68 | 5.65E-06 | 1.20E-04 |
| 17527433 | C230081A13Rik | 0.68 | 5.84E-04 | 4.49E-03 |
| 17425770 | Ptgr1         | 0.68 | 5.10E-04 | 4.03E-03 |
| 17396143 | Car13         | 0.68 | 1.65E-05 | 2.79E-04 |
| 17507955 | Atp7b         | 0.68 | 4.88E-04 | 3.89E-03 |
| 17409343 | 5330417C22Rik | 0.68 | 2.34E-04 | 2.21E-03 |
| 17453304 | Gtf2i         | 0.68 | 1.20E-05 | 2.16E-04 |
| 17341660 | Prss30        | 0.68 | 7.66E-04 | 5.55E-03 |
| 17336921 | Ly6g6c        | 0.68 | 2.78E-04 | 2.53E-03 |
| 17225460 | Rab17         | 0.68 | 1.71E-04 | 1.73E-03 |
| 17343164 | Tff3          | 0.68 | 5.72E-06 | 1.20E-04 |
| 17468532 | Gmcl1         | 0.68 | 2.52E-05 | 3.86E-04 |
| 17338472 | Mocs1         | 0.68 | 2.91E-04 | 2.62E-03 |
| 17548057 | AA667203      | 0.68 | 8.20E-06 | 1.56E-04 |
| 17265672 | Spns2         | 0.68 | 4.66E-04 | 3.76E-03 |
| 17337852 | Clic5         | 0.68 | 2.08E-05 | 3.34E-04 |
| 17231591 | Zc3h12d       | 0.68 | 7.76E-05 | 9.25E-04 |
| 17223685 | Ndufs1        | 0.68 | 1.12E-05 | 2.03E-04 |
| 17444876 | Pomp          | 0.68 | 1.43E-04 | 1.50E-03 |
| 17475975 | Ech1          | 0.68 | 5.55E-06 | 1.18E-04 |
| 17267846 | Abcc3         | 0.68 | 1.97E-05 | 3.19E-04 |
| 17435934 | Khk           | 0.68 | 1.52E-03 | 9.68E-03 |
| 17220432 | Tlr5          | 0.68 | 2.02E-04 | 1.97E-03 |
| 17282689 | Acyp1         | 0.67 | 1.68E-05 | 2.83E-04 |
| 17335966 | Cyp4f16       | 0.67 | 1.58E-03 | 9.98E-03 |
| 17284170 | 2010107E04Rik | 0.67 | 3.78E-04 | 3.19E-03 |
| 17291361 | Aldh5a1       | 0.67 | 5.88E-04 | 4.51E-03 |
| 17469259 | Suclg2        | 0.67 | 3.39E-06 | 7.95E-05 |
| 17386621 | Atp5g3        | 0.67 | 5.71E-06 | 1.20E-04 |
| 17509682 | BC030870      | 0.67 | 2.09E-04 | 2.03E-03 |
| 17461978 | Cand2         | 0.67 | 1.26E-03 | 8.27E-03 |
| 17356794 | Men1          | 0.67 | 2.19E-05 | 3.47E-04 |
| 17290301 | Akr1e1        | 0.67 | 9.46E-04 | 6.60E-03 |
| 17342029 | Ndufb10       | 0.67 | 5.21E-06 | 1.12E-04 |
| 17459014 | Abcg2         | 0.67 | 9.27E-05 | 1.07E-03 |
| 17346802 | Ndufv2        | 0.67 | 2.25E-05 | 3.54E-04 |
| 17400375 | Ctss          | 0.67 | 1.37E-05 | 2.39E-04 |
| 17252200 | Kif1c         | 0.67 | 5.82E-06 | 1.22E-04 |
| 17509629 | Sc4mol        | 0.67 | 7.67E-06 | 1.48E-04 |
| 17243022 | Btbd2         | 0.67 | 6.15E-05 | 7.66E-04 |
| 17472023 | Mansc1        | 0.67 | 1.47E-05 | 2.54E-04 |
| 17524930 | Acp5          | 0.67 | 1.74E-05 | 2.90E-04 |
| 17264382 | Wdr16         | 0.67 | 1.64E-04 | 1.68E-03 |
| 17336602 | Pbx2          | 0.67 | 1.68E-04 | 1.71E-03 |
| 17224433 | Ihh           | 0.67 | 3.68E-05 | 5.18E-04 |

|          |               |      |          |          |
|----------|---------------|------|----------|----------|
| 17233771 | Neurog3       | 0.67 | 1.11E-03 | 7.52E-03 |
| 17423544 | Wwp1          | 0.67 | 2.46E-05 | 3.80E-04 |
| 17416460 | Yipf1         | 0.67 | 1.02E-04 | 1.16E-03 |
| 17525329 | St3gal4       | 0.67 | 5.30E-06 | 1.14E-04 |
| 17446793 | Slc5a6        | 0.67 | 1.37E-03 | 8.89E-03 |
| 17430080 | Eif2c1        | 0.67 | 1.30E-04 | 1.40E-03 |
| 17404180 | Car1          | 0.67 | 1.82E-06 | 4.94E-05 |
| 17253133 | Fam57a        | 0.67 | 3.30E-06 | 7.77E-05 |
| 17443535 | Ufsp1         | 0.67 | 1.07E-03 | 7.29E-03 |
| 17531591 | Nbeal2        | 0.67 | 6.03E-05 | 7.56E-04 |
| 17508633 | Wrn           | 0.67 | 2.01E-04 | 1.96E-03 |
| 17426198 | Hdhd3         | 0.67 | 5.25E-06 | 1.13E-04 |
| 17423854 | Slc35a1       | 0.67 | 9.80E-05 | 1.12E-03 |
| 17237681 | 9230105E05Rik | 0.67 | 6.89E-05 | 8.35E-04 |
| 17334846 | Tmem8         | 0.67 | 3.59E-06 | 8.29E-05 |
| 17340831 | Slc22a1       | 0.67 | 1.86E-04 | 1.85E-03 |
| 17518672 | Fam96a        | 0.66 | 4.16E-05 | 5.70E-04 |
| 17475734 | Fcgbp         | 0.66 | 3.19E-05 | 4.65E-04 |
| 17219156 | 3110045C21Rik | 0.66 | 3.10E-04 | 2.74E-03 |
| 17360084 | As3mt         | 0.66 | 5.81E-06 | 1.22E-04 |
| 17295588 | Naip5         | 0.66 | 3.81E-04 | 3.20E-03 |
| 17315677 | BC037032      | 0.66 | 1.47E-04 | 1.54E-03 |
| 17404109 | Impa1         | 0.66 | 6.45E-06 | 1.32E-04 |
| 17282074 | Rab15         | 0.66 | 5.15E-04 | 4.06E-03 |
| 17346311 | 2410015M20Rik | 0.66 | 1.11E-04 | 1.24E-03 |
| 17309688 | A2ld1         | 0.66 | 9.14E-05 | 1.06E-03 |
| 17288876 | Arrdc3        | 0.66 | 2.37E-05 | 3.70E-04 |
| 17230918 | Cenpf         | 0.66 | 8.39E-06 | 1.59E-04 |
| 17282836 | Vipar         | 0.66 | 2.93E-05 | 4.36E-04 |
| 17277043 | Dcaf4         | 0.66 | 4.43E-05 | 5.98E-04 |
| 17216620 | Tfcp2l1       | 0.66 | 1.88E-05 | 3.08E-04 |
| 17235354 | Gm19876       | 0.66 | 3.58E-06 | 8.29E-05 |
| 17287486 | Cdhr2         | 0.66 | 2.24E-06 | 5.76E-05 |
| 17438423 | Paics         | 0.66 | 1.14E-04 | 1.26E-03 |
| 17458911 | Fkbp9         | 0.66 | 9.83E-06 | 1.82E-04 |
| 17407926 | Mrps21        | 0.66 | 4.12E-05 | 5.67E-04 |
| 17265657 | Smtnl2        | 0.66 | 3.95E-04 | 3.29E-03 |
| 17411103 | Lphn2         | 0.66 | 1.23E-04 | 1.33E-03 |
| 17318587 | Slc39a4       | 0.66 | 6.85E-07 | 2.35E-05 |
| 17433944 | Ttll10        | 0.66 | 3.04E-04 | 2.70E-03 |
| 17359156 | Tmem20        | 0.66 | 3.08E-05 | 4.53E-04 |
| 17542654 | Lage3         | 0.66 | 3.12E-05 | 4.57E-04 |
| 17351446 | Impa2         | 0.66 | 3.54E-04 | 3.02E-03 |
| 17460073 | Bola3         | 0.66 | 7.15E-04 | 5.26E-03 |
| 17414434 | Ugcg          | 0.66 | 3.00E-05 | 4.44E-04 |

|          |               |      |          |          |
|----------|---------------|------|----------|----------|
| 17259907 | Tcn2          | 0.66 | 5.37E-06 | 1.15E-04 |
| 17415973 | Leprot        | 0.66 | 2.02E-06 | 5.32E-05 |
| 17520560 | Tfdp2         | 0.66 | 1.66E-04 | 1.70E-03 |
| 17518780 | Car12         | 0.66 | 6.73E-05 | 8.20E-04 |
| 17500996 | Acs1          | 0.66 | 1.26E-05 | 2.23E-04 |
| 17377498 | Pygb          | 0.66 | 6.34E-06 | 1.30E-04 |
| 17407378 | Lor           | 0.66 | 4.98E-04 | 3.95E-03 |
| 17444068 | Nudt1         | 0.66 | 1.68E-04 | 1.71E-03 |
| 17461684 | Il17re        | 0.66 | 7.46E-04 | 5.43E-03 |
| 17324643 | Bdh1          | 0.66 | 2.34E-05 | 3.67E-04 |
| 17426631 | 3110001D03Rik | 0.66 | 2.60E-06 | 6.45E-05 |
| 17392549 | 9030622O22Rik | 0.66 | 4.67E-04 | 3.77E-03 |
| 17350684 | Gm4221        | 0.66 | 7.42E-04 | 5.41E-03 |
| 17415606 | Nfia          | 0.66 | 4.65E-05 | 6.19E-04 |
| 17324733 | 1500031L02Rik | 0.66 | 1.65E-04 | 1.68E-03 |
| 17466908 | Hibadh        | 0.66 | 5.74E-05 | 7.26E-04 |
| 17248666 | Rnf145        | 0.66 | 7.31E-06 | 1.42E-04 |
| 17251728 | Zbtb4         | 0.66 | 5.18E-04 | 4.09E-03 |
| 17527054 | Atm           | 0.66 | 2.04E-04 | 1.99E-03 |
| 17518238 | Calml4        | 0.66 | 1.11E-06 | 3.35E-05 |
| 17361073 | Gstp1         | 0.66 | 1.09E-06 | 3.32E-05 |
| 17258451 | 1110017F19Rik | 0.66 | 1.09E-05 | 1.99E-04 |
| 17513010 | Clec18a       | 0.65 | 5.85E-04 | 4.49E-03 |
| 17344336 | Tcf19         | 0.65 | 4.96E-05 | 6.48E-04 |
| 17423915 | Mob3b         | 0.65 | 1.86E-05 | 3.06E-04 |
| 17381864 | Trdmt1        | 0.65 | 1.50E-04 | 1.57E-03 |
| 17430630 | Zcchc17       | 0.65 | 2.85E-04 | 2.57E-03 |
| 17414277 | Zfp462        | 0.65 | 4.77E-04 | 3.82E-03 |
| 17453506 | 2010001M06Rik | 0.65 | 1.77E-06 | 4.84E-05 |
| 17286791 | Tmem170b      | 0.65 | 1.25E-04 | 1.35E-03 |
| 17528418 | Lactb         | 0.65 | 5.63E-04 | 4.36E-03 |
| 17346461 | Slc25a23      | 0.65 | 3.15E-04 | 2.77E-03 |
| 17236878 | Galnt4        | 0.65 | 1.91E-06 | 5.12E-05 |
| 17516960 | Cadm1         | 0.65 | 9.40E-05 | 1.08E-03 |
| 17265026 | Kctd11        | 0.65 | 4.37E-05 | 5.93E-04 |
| 17354730 | Slc26a2       | 0.65 | 1.86E-05 | 3.06E-04 |
| 17527123 | Acat1         | 0.65 | 7.14E-06 | 1.40E-04 |
| 17325770 | Gm608         | 0.65 | 2.89E-05 | 4.32E-04 |
| 17241789 | Cisd1         | 0.65 | 3.46E-05 | 4.95E-04 |
| 17273292 | Dcxr          | 0.65 | 7.62E-07 | 2.53E-05 |
| 17514424 | Casp1         | 0.65 | 4.54E-06 | 1.01E-04 |
| 17437765 | Klb           | 0.65 | 4.18E-04 | 3.44E-03 |
| 17356314 | Mrpl11        | 0.65 | 2.52E-06 | 6.29E-05 |
| 17286487 | Bphl          | 0.65 | 6.75E-05 | 8.21E-04 |
| 17338701 | Chaf1a        | 0.65 | 6.40E-05 | 7.90E-04 |



|          |               |      |          |          |
|----------|---------------|------|----------|----------|
| 17376480 | Mavs          | 0.65 | 2.83E-04 | 2.56E-03 |
| 17477774 | Hrc           | 0.65 | 7.86E-04 | 5.67E-03 |
| 17350869 | Isoc1         | 0.65 | 2.71E-04 | 2.49E-03 |
| 17290275 | Akr1c12       | 0.65 | 1.00E-05 | 1.84E-04 |
| 17473856 | Lig1          | 0.65 | 4.74E-05 | 6.28E-04 |
| 17497612 | Echs1         | 0.65 | 1.41E-04 | 1.48E-03 |
| 17472868 | Tm7sf3        | 0.65 | 5.09E-06 | 1.10E-04 |
| 17338747 | Uhrf1         | 0.65 | 1.70E-05 | 2.85E-04 |
| 17524535 | Dnmt1         | 0.65 | 1.71E-06 | 4.74E-05 |
| 17498695 | 2900053A13Rik | 0.65 | 9.64E-06 | 1.80E-04 |
| 17306501 | Ppp1r3e       | 0.65 | 1.94E-04 | 1.91E-03 |
| 17435170 | 6030443J06Rik | 0.65 | 4.33E-04 | 3.54E-03 |
| 17236882 | Dusp6         | 0.64 | 1.55E-06 | 4.39E-05 |
| 17481102 | Rrm1          | 0.64 | 5.98E-05 | 7.52E-04 |
| 17450354 | Hsd17b13      | 0.64 | 7.26E-04 | 5.32E-03 |
| 17265306 | Slc25a11      | 0.64 | 6.99E-07 | 2.39E-05 |
| 17463909 | Mgst1         | 0.64 | 6.74E-06 | 1.35E-04 |
| 17380199 | Rbm38         | 0.64 | 1.84E-04 | 1.84E-03 |
| 17505718 | Pdpr          | 0.64 | 3.48E-05 | 4.97E-04 |
| 17240303 | G630090E17Rik | 0.64 | 1.51E-03 | 9.63E-03 |
| 17304141 | Ppifos        | 0.64 | 1.04E-04 | 1.18E-03 |
| 17230550 | Lbr           | 0.64 | 1.04E-06 | 3.19E-05 |
| 17434614 | 4930420K17Rik | 0.64 | 6.32E-05 | 7.84E-04 |
| 17308132 | Slc25a37      | 0.64 | 8.36E-05 | 9.85E-04 |
| 17369896 | St6galnac6    | 0.64 | 2.06E-05 | 3.31E-04 |
| 17226232 | Ptpn4         | 0.64 | 1.05E-04 | 1.18E-03 |
| 17220794 | D730003I15Rik | 0.64 | 1.03E-03 | 7.06E-03 |
| 17417146 | Pdzk1ip1      | 0.64 | 3.52E-06 | 8.18E-05 |
| 17228375 | Xpr1          | 0.64 | 2.86E-06 | 6.98E-05 |
| 17498897 | Tnfsf13b      | 0.64 | 9.24E-04 | 6.49E-03 |
| 17248242 | Snrnp25       | 0.64 | 5.27E-04 | 4.13E-03 |
| 17304794 | Hacl1         | 0.64 | 1.05E-04 | 1.18E-03 |
| 17253512 | 2610507B11Rik | 0.64 | 1.04E-06 | 3.19E-05 |
| 17323828 | B3gnt5        | 0.64 | 1.15E-05 | 2.08E-04 |
| 17440954 | Mvk           | 0.64 | 4.68E-05 | 6.22E-04 |
| 17462180 | Zfp239        | 0.64 | 2.61E-04 | 2.40E-03 |
| 17507637 | Rasa3         | 0.64 | 1.10E-03 | 7.48E-03 |
| 17499396 | Fbxo25        | 0.64 | 2.59E-05 | 3.94E-04 |
| 17429441 | Guca2b        | 0.64 | 4.47E-05 | 6.02E-04 |
| 17219356 | Tstd1         | 0.64 | 6.40E-07 | 2.25E-05 |
| 17328432 | Mcm4          | 0.64 | 9.95E-06 | 1.84E-04 |
| 17420064 | Tcea3         | 0.64 | 4.06E-04 | 3.36E-03 |
| 17512221 | Cmtm4         | 0.64 | 1.61E-05 | 2.74E-04 |
| 17267685 | Pctp          | 0.64 | 5.56E-06 | 1.18E-04 |
| 17530141 | Pccb          | 0.64 | 4.68E-05 | 6.22E-04 |

|          |               |      |          |          |
|----------|---------------|------|----------|----------|
| 17530669 | Acy1          | 0.64 | 1.16E-04 | 1.28E-03 |
| 17343505 | Cyp4f13       | 0.63 | 2.35E-04 | 2.22E-03 |
| 17365098 | Scd1          | 0.63 | 9.33E-05 | 1.08E-03 |
| 17216753 | Mgat5         | 0.63 | 4.12E-05 | 5.67E-04 |
| 17516462 | Thy1          | 0.63 | 1.19E-03 | 7.93E-03 |
| 17359769 | Sema4g        | 0.63 | 5.05E-06 | 1.09E-04 |
| 17355915 | Cpt1a         | 0.63 | 7.47E-06 | 1.44E-04 |
| 17449033 | Ppat          | 0.63 | 1.30E-04 | 1.40E-03 |
| 17214368 | Cyp27a1       | 0.63 | 1.34E-04 | 1.43E-03 |
| 17375557 | Sema6d        | 0.63 | 5.49E-05 | 7.01E-04 |
| 17509101 | Tlr3          | 0.63 | 5.62E-05 | 7.14E-04 |
| 17303442 | Oit1          | 0.63 | 7.14E-06 | 1.40E-04 |
| 17542239 | Cetn2         | 0.63 | 2.72E-05 | 4.11E-04 |
| 17283303 | Ccdc88c       | 0.63 | 4.47E-05 | 6.02E-04 |
| 17273304 | Cbr2          | 0.63 | 6.58E-06 | 1.34E-04 |
| 17387464 | 2700094K13Rik | 0.63 | 5.00E-06 | 1.09E-04 |
| 17463169 | Scnn1a        | 0.63 | 5.66E-07 | 2.03E-05 |
| 17495673 | Gm19963       | 0.63 | 6.47E-04 | 4.87E-03 |
| 17324794 | Tctex1d2      | 0.63 | 1.56E-04 | 1.62E-03 |
| 17391233 | Itipr1l1      | 0.63 | 3.97E-05 | 5.51E-04 |
| 17351168 | Htr4          | 0.63 | 1.22E-03 | 8.09E-03 |
| 17253599 | Aldoc         | 0.63 | 6.62E-06 | 1.34E-04 |
| 17297576 | Adk           | 0.63 | 3.04E-06 | 7.33E-05 |
| 17509462 | Galnt7        | 0.63 | 1.77E-06 | 4.84E-05 |
| 17243576 | App12         | 0.63 | 1.94E-06 | 5.16E-05 |
| 17215029 | 2810459M11Rik | 0.63 | 2.40E-04 | 2.25E-03 |
| 17362595 | Fads2         | 0.63 | 4.69E-05 | 6.23E-04 |
| 17509976 | Slc25a42      | 0.63 | 6.93E-06 | 1.37E-04 |
| 17211396 | Tmem14a       | 0.63 | 1.16E-03 | 7.81E-03 |
| 17517828 | Cyp11a1       | 0.63 | 3.11E-04 | 2.74E-03 |
| 17541417 | Aifm1         | 0.63 | 8.37E-06 | 1.59E-04 |
| 17509146 | Snx25         | 0.63 | 2.30E-06 | 5.88E-05 |
| 17293547 | Fbp2          | 0.63 | 3.32E-06 | 7.79E-05 |
| 17229466 | Hsd17b7       | 0.63 | 3.57E-06 | 8.27E-05 |
| 17440257 | Pcgf3         | 0.63 | 6.53E-07 | 2.28E-05 |
| 17469864 | 1500001M20Rik | 0.63 | 6.62E-07 | 2.30E-05 |
| 17350517 | Hsd17b4       | 0.63 | 9.85E-06 | 1.82E-04 |
| 17321871 | Krt84         | 0.63 | 6.38E-04 | 4.82E-03 |
| 17441949 | Aldh2         | 0.63 | 7.69E-07 | 2.53E-05 |
| 17470394 | B4galnt3      | 0.63 | 4.41E-05 | 5.96E-04 |
| 17489223 | Cox6b1        | 0.63 | 3.71E-06 | 8.52E-05 |
| 17215395 | Dgkd          | 0.62 | 3.13E-05 | 4.58E-04 |
| 17293362 | Ctla2a        | 0.62 | 1.31E-03 | 8.55E-03 |
| 17524014 | Endod1        | 0.62 | 2.54E-06 | 6.33E-05 |
| 17487681 | Zfp109        | 0.62 | 2.81E-05 | 4.21E-04 |

|          |               |      |          |          |
|----------|---------------|------|----------|----------|
| 17366511 | Phyh          | 0.62 | 1.20E-06 | 3.58E-05 |
| 17258569 | Exoc7         | 0.62 | 4.75E-04 | 3.81E-03 |
| 17341280 | Gm19747       | 0.62 | 2.82E-05 | 4.23E-04 |
| 17245466 | Tbc1d30       | 0.62 | 3.05E-04 | 2.71E-03 |
| 17282158 | Rdh11         | 0.62 | 2.09E-05 | 3.34E-04 |
| 17521875 | Slc25a20      | 0.62 | 4.94E-06 | 1.08E-04 |
| 17229007 | Fmo4          | 0.62 | 1.35E-04 | 1.43E-03 |
| 17216960 | Pigr          | 0.62 | 4.17E-06 | 9.42E-05 |
| 17361546 | Cst6          | 0.62 | 1.19E-04 | 1.31E-03 |
| 17502348 | Zfp961        | 0.62 | 1.32E-04 | 1.41E-03 |
| 17523309 | Vipr1         | 0.62 | 1.34E-05 | 2.35E-04 |
| 17219489 | Pex19         | 0.62 | 9.78E-05 | 1.12E-03 |
| 17494822 | Nlrp10        | 0.62 | 1.20E-05 | 2.16E-04 |
| 17286046 | 4932702P03Rik | 0.62 | 2.40E-05 | 3.73E-04 |
| 17338934 | Alkbh7        | 0.62 | 1.07E-04 | 1.19E-03 |
| 17277939 | 9030617O03Rik | 0.62 | 2.47E-05 | 3.81E-04 |
| 17213179 | Ndufb3        | 0.62 | 2.00E-04 | 1.96E-03 |
| 17452378 | Rad9b         | 0.62 | 5.65E-04 | 4.37E-03 |
| 17505455 | Phlpp2        | 0.62 | 1.21E-05 | 2.16E-04 |
| 17543264 | Maged1        | 0.62 | 1.11E-06 | 3.35E-05 |
| 17350090 | Sh3rf2        | 0.62 | 4.37E-06 | 9.77E-05 |
| 17246700 | Gal3st1       | 0.62 | 6.73E-05 | 8.20E-04 |
| 17302161 | 1300010F03Rik | 0.62 | 5.72E-06 | 1.20E-04 |
| 17279701 | Cdca7l        | 0.62 | 4.35E-04 | 3.55E-03 |
| 17511263 | Best2         | 0.62 | 3.66E-04 | 3.11E-03 |
| 17402485 | 4930422G04Rik | 0.62 | 1.97E-04 | 1.94E-03 |
| 17490889 | 0610005C13Rik | 0.62 | 9.48E-05 | 1.09E-03 |
| 17525548 | Ei24          | 0.62 | 1.96E-06 | 5.20E-05 |
| 17518331 | Tipin         | 0.62 | 6.07E-05 | 7.60E-04 |
| 17510707 | Lsm6          | 0.62 | 7.04E-06 | 1.38E-04 |
| 17345124 | Enpp4         | 0.62 | 1.87E-04 | 1.86E-03 |
| 17511878 | Plip          | 0.62 | 3.41E-06 | 7.98E-05 |
| 17407561 | Snx27         | 0.62 | 2.01E-04 | 1.96E-03 |
| 17405908 | Bche          | 0.62 | 3.84E-05 | 5.37E-04 |
| 17266960 | Ccl6          | 0.62 | 8.10E-04 | 5.82E-03 |
| 17533234 | Sytl5         | 0.62 | 5.66E-05 | 7.17E-04 |
| 17223490 | Tmem237       | 0.62 | 4.02E-05 | 5.55E-04 |
| 17237208 | Csrp2         | 0.62 | 2.81E-07 | 1.21E-05 |
| 17340285 | Msh2          | 0.62 | 4.67E-04 | 3.77E-03 |
| 17427961 | Cpt2          | 0.62 | 5.54E-07 | 2.01E-05 |
| 17339313 | Epb4.1l3      | 0.62 | 1.82E-05 | 3.02E-04 |
| 17460393 | Fam136a       | 0.61 | 2.46E-04 | 2.30E-03 |
| 17379037 | Plcg1         | 0.61 | 1.63E-05 | 2.77E-04 |
| 17247948 | Efemp1        | 0.61 | 6.56E-04 | 4.91E-03 |
| 17459676 | Retsat        | 0.61 | 3.53E-06 | 8.20E-05 |

|          |               |      |          |          |
|----------|---------------|------|----------|----------|
| 17527565 | Csk           | 0.61 | 7.12E-06 | 1.39E-04 |
| 17474130 | Ceacam9       | 0.61 | 1.34E-03 | 8.73E-03 |
| 17241318 | Hk1           | 0.61 | 4.71E-05 | 6.25E-04 |
| 17235748 | Aes           | 0.61 | 1.82E-07 | 8.58E-06 |
| 17484710 | B4galnt4      | 0.61 | 6.50E-05 | 7.99E-04 |
| 17542149 | lds           | 0.61 | 5.71E-06 | 1.20E-04 |
| 17393173 | Pxmp4         | 0.61 | 9.38E-05 | 1.08E-03 |
| 17421828 | Clstn1        | 0.61 | 3.23E-07 | 1.35E-05 |
| 17218349 | Glul          | 0.61 | 4.32E-07 | 1.69E-05 |
| 17310882 | Pgcp          | 0.61 | 1.12E-04 | 1.24E-03 |
| 17236339 | Gnptab        | 0.61 | 6.16E-04 | 4.68E-03 |
| 17374238 | Nop10         | 0.61 | 3.65E-06 | 8.43E-05 |
| 17255540 | Gm11538       | 0.61 | 3.67E-04 | 3.12E-03 |
| 17520851 | Anapc13       | 0.61 | 3.64E-07 | 1.47E-05 |
| 17369841 | Fam102a       | 0.61 | 1.63E-06 | 4.55E-05 |
| 17233347 | Gja1          | 0.61 | 1.93E-06 | 5.16E-05 |
| 17217247 | Pik3c2b       | 0.61 | 2.17E-05 | 3.45E-04 |
| 17407354 | S100a1        | 0.61 | 1.04E-06 | 3.19E-05 |
| 17216339 | Tnfrsf11a     | 0.61 | 1.41E-05 | 2.46E-04 |
| 17307041 | Gm10873       | 0.61 | 6.50E-07 | 2.28E-05 |
| 17242140 | 4930483K19Rik | 0.61 | 9.36E-04 | 6.56E-03 |
| 17409668 | Cdc14a        | 0.61 | 1.54E-06 | 4.38E-05 |
| 17289497 | Ccdc125       | 0.60 | 3.14E-04 | 2.76E-03 |
| 17408509 | Atp1a1        | 0.60 | 8.51E-08 | 4.67E-06 |
| 17222777 | Slc40a1       | 0.60 | 1.18E-05 | 2.13E-04 |
| 17502191 | Mrpl34        | 0.60 | 1.20E-06 | 3.59E-05 |
| 17435855 | Mapre3        | 0.60 | 6.24E-05 | 7.76E-04 |
| 17340845 | Igf2r         | 0.60 | 4.60E-05 | 6.16E-04 |
| 17411323 | Acadm         | 0.60 | 4.64E-07 | 1.75E-05 |
| 17498847 | Lass4         | 0.60 | 5.01E-06 | 1.09E-04 |
| 17489214 | Upk1a         | 0.60 | 6.40E-04 | 4.83E-03 |
| 17221786 | 1110058L19Rik | 0.60 | 4.96E-06 | 1.08E-04 |
| 17246113 | Slc39a5       | 0.60 | 5.10E-04 | 4.03E-03 |
| 17410939 | Clca3         | 0.60 | 1.77E-06 | 4.84E-05 |
| 17535434 | Nsdhl         | 0.60 | 8.92E-07 | 2.85E-05 |
| 17275223 | Immp2l        | 0.60 | 4.80E-04 | 3.84E-03 |
| 17226302 | Dbi           | 0.60 | 8.31E-07 | 2.68E-05 |
| 17292262 | Tpmt          | 0.60 | 2.26E-04 | 2.16E-03 |
| 17383588 | Ccbl1         | 0.60 | 1.26E-03 | 8.30E-03 |
| 17383139 | Abo           | 0.60 | 1.36E-03 | 8.80E-03 |
| 17443985 | Cyp2w1        | 0.60 | 1.05E-04 | 1.18E-03 |
| 17286462 | Nqo2          | 0.60 | 1.97E-05 | 3.19E-04 |
| 17329167 | Clcn2         | 0.60 | 1.86E-06 | 5.04E-05 |
| 17507368 | 3930402G23Rik | 0.60 | 1.61E-04 | 1.66E-03 |
| 17526982 | Gm684         | 0.60 | 4.80E-04 | 3.84E-03 |

|          |               |      |          |          |
|----------|---------------|------|----------|----------|
| 17486818 | Gltscr1       | 0.60 | 1.65E-05 | 2.79E-04 |
| 17464210 | Lrmp          | 0.60 | 3.66E-04 | 3.11E-03 |
| 17234795 | Gm19722       | 0.60 | 2.16E-06 | 5.63E-05 |
| 17434490 | Steap4        | 0.60 | 1.71E-04 | 1.73E-03 |
| 17428545 | Uqcrh         | 0.60 | 3.10E-06 | 7.43E-05 |
| 17319823 | 1700001L05Rik | 0.60 | 2.51E-05 | 3.84E-04 |
| 17451987 | Tpcn1         | 0.60 | 2.38E-06 | 6.01E-05 |
| 17468486 | Pcyox1        | 0.59 | 3.23E-06 | 7.65E-05 |
| 17224738 | Ap1s3         | 0.59 | 1.70E-06 | 4.73E-05 |
| 17233669 | Pcbd1         | 0.59 | 1.03E-06 | 3.18E-05 |
| 17544453 | Trmt2b        | 0.59 | 2.25E-06 | 5.77E-05 |
| 17481066 | Pgap2         | 0.59 | 7.18E-06 | 1.40E-04 |
| 17448308 | Ugdh          | 0.59 | 2.78E-07 | 1.20E-05 |
| 17460933 | Lsm3          | 0.59 | 3.82E-06 | 8.70E-05 |
| 17533269 | Tspan7        | 0.59 | 2.65E-06 | 6.52E-05 |
| 17464672 | Slc25a13      | 0.59 | 6.31E-05 | 7.84E-04 |
| 17388016 | Olfr1269      | 0.59 | 3.53E-05 | 5.02E-04 |
| 17243183 | Creb3l3       | 0.59 | 3.05E-04 | 2.71E-03 |
| 17429954 | 1700029G01Rik | 0.59 | 6.50E-06 | 1.32E-04 |
| 17313877 | Ttc38         | 0.59 | 4.63E-05 | 6.18E-04 |
| 17382384 | A830007P12Rik | 0.59 | 4.76E-07 | 1.79E-05 |
| 17393592 | Ndr3          | 0.59 | 4.05E-07 | 1.61E-05 |
| 17524156 | 4931406C07Rik | 0.59 | 1.76E-07 | 8.35E-06 |
| 17256632 | Wnk4          | 0.59 | 5.66E-07 | 2.03E-05 |
| 17340943 | Mrpl18        | 0.59 | 4.07E-07 | 1.62E-05 |
| 17244506 | Mrpl42        | 0.58 | 5.05E-05 | 6.55E-04 |
| 17310637 | Fam134b       | 0.58 | 7.45E-06 | 1.44E-04 |
| 17300735 | Atp12a        | 0.58 | 2.13E-07 | 9.78E-06 |
| 17497713 | Ifitm2        | 0.58 | 1.83E-05 | 3.03E-04 |
| 17517112 | Gm19447       | 0.58 | 1.25E-07 | 6.50E-06 |
| 17526149 | Pdzd3         | 0.58 | 1.34E-03 | 8.74E-03 |
| 17520326 | Plscr2        | 0.58 | 8.01E-04 | 5.77E-03 |
| 17307905 | Dpysl2        | 0.58 | 3.32E-05 | 4.80E-04 |
| 17524944 | Zfp599        | 0.58 | 1.15E-03 | 7.73E-03 |
| 17361299 | 2010003K11Rik | 0.58 | 4.85E-06 | 1.06E-04 |
| 17419773 | Stmn1         | 0.58 | 3.22E-05 | 4.68E-04 |
| 17298364 | Nt5dc2        | 0.58 | 2.89E-05 | 4.32E-04 |
| 17472085 | Pbp2          | 0.58 | 1.14E-04 | 1.26E-03 |
| 17527963 | Paqr5         | 0.58 | 1.02E-07 | 5.44E-06 |
| 17546119 | Prps2         | 0.58 | 1.77E-05 | 2.94E-04 |
| 17215097 | B3gnt7        | 0.57 | 2.15E-04 | 2.07E-03 |
| 17243330 | Nfic          | 0.57 | 6.03E-06 | 1.25E-04 |
| 17429008 | St3gal3       | 0.57 | 2.03E-06 | 5.35E-05 |
| 17498467 | Ano1          | 0.57 | 1.99E-06 | 5.25E-05 |
| 17457504 | Rab19         | 0.57 | 4.78E-06 | 1.05E-04 |

|          |               |      |          |          |
|----------|---------------|------|----------|----------|
| 17340197 | Epas1         | 0.57 | 2.07E-06 | 5.44E-05 |
| 17363559 | Fam189a2      | 0.57 | 2.86E-04 | 2.58E-03 |
| 17231717 | Fuca2         | 0.57 | 1.94E-07 | 9.05E-06 |
| 17345004 | LOC100862363  | 0.57 | 1.46E-06 | 4.17E-05 |
| 17472530 | Kcnj8         | 0.57 | 1.79E-04 | 1.80E-03 |
| 17276520 | Mthfd1        | 0.57 | 1.76E-05 | 2.93E-04 |
| 17360331 | Mxi1          | 0.57 | 2.72E-07 | 1.19E-05 |
| 17339554 | Lbh           | 0.57 | 7.69E-08 | 4.41E-06 |
| 17388667 | B230118H07Rik | 0.57 | 1.68E-04 | 1.71E-03 |
| 17443539 | Ephb4         | 0.57 | 3.27E-06 | 7.71E-05 |
| 17480740 | Ucp2          | 0.57 | 4.26E-08 | 2.81E-06 |
| 17387430 | D030029J20Rik | 0.57 | 1.75E-04 | 1.76E-03 |
| 17454121 | Agfg2         | 0.57 | 6.70E-06 | 1.35E-04 |
| 17442780 | Glt1d1        | 0.57 | 5.06E-05 | 6.55E-04 |
| 17443185 | Mlxipl        | 0.56 | 2.15E-06 | 5.62E-05 |
| 17417784 | 2610528J11Rik | 0.56 | 1.88E-05 | 3.08E-04 |
| 17520976 | Tmem108       | 0.56 | 1.51E-03 | 9.60E-03 |
| 17423622 | 2610029I01Rik | 0.56 | 2.78E-05 | 4.19E-04 |
| 17288903 | Mblac2        | 0.56 | 3.86E-05 | 5.38E-04 |
| 17252497 | Atp2a3        | 0.56 | 1.01E-06 | 3.11E-05 |
| 17321683 | Slc11a2       | 0.56 | 1.22E-05 | 2.18E-04 |
| 17268227 | Abi3          | 0.56 | 6.64E-07 | 2.31E-05 |
| 17220529 | Mir194-1      | 0.56 | 2.36E-04 | 2.22E-03 |
| 17517390 | ldh3a         | 0.56 | 3.00E-06 | 7.26E-05 |
| 17458718 | Prr15         | 0.56 | 4.31E-07 | 1.69E-05 |
| 17526843 | Sdhd          | 0.56 | 2.36E-07 | 1.06E-05 |
| 17253648 | Slc46a1       | 0.56 | 1.99E-06 | 5.25E-05 |
| 17409736 | Slc35a3       | 0.56 | 9.26E-07 | 2.92E-05 |
| 17276297 | 2210039B01Rik | 0.56 | 4.11E-04 | 3.39E-03 |
| 17241921 | Gstt3         | 0.56 | 2.33E-04 | 2.21E-03 |
| 17516098 | Siae          | 0.56 | 6.33E-05 | 7.85E-04 |
| 17537048 | Cox7b         | 0.56 | 1.69E-04 | 1.71E-03 |
| 17324420 | St6gal1       | 0.56 | 3.55E-04 | 3.03E-03 |
| 17314577 | Pfkm          | 0.56 | 4.80E-05 | 6.33E-04 |
| 17269521 | Acly          | 0.56 | 9.13E-07 | 2.89E-05 |
| 17422659 | B930041F14Rik | 0.56 | 6.30E-05 | 7.83E-04 |
| 17532692 | LOC100861738  | 0.56 | 2.48E-05 | 3.81E-04 |
| 17337844 | Enpp5         | 0.56 | 1.30E-07 | 6.61E-06 |
| 17268120 | Pdk2          | 0.56 | 4.66E-08 | 3.02E-06 |
| 17405827 | 1110032A04Rik | 0.56 | 2.54E-07 | 1.12E-05 |
| 17268010 | Acsf2         | 0.56 | 1.38E-06 | 4.01E-05 |
| 17217321 | Golt1a        | 0.56 | 1.62E-06 | 4.54E-05 |
| 17343856 | Btnl5         | 0.56 | 1.21E-05 | 2.16E-04 |
| 17547658 | LOC100503141  | 0.55 | 1.43E-04 | 1.50E-03 |
| 17471222 | Ccnd2         | 0.55 | 1.41E-07 | 6.94E-06 |

|          |               |      |          |          |
|----------|---------------|------|----------|----------|
| 17457887 | Tmem139       | 0.55 | 1.46E-05 | 2.52E-04 |
| 17450989 | Pxmp2         | 0.55 | 3.90E-04 | 3.26E-03 |
| 17252359 | Ggt6          | 0.55 | 2.24E-05 | 3.53E-04 |
| 17362717 | Dak           | 0.55 | 1.41E-05 | 2.46E-04 |
| 17378359 | Acss2         | 0.55 | 7.59E-07 | 2.53E-05 |
| 17315152 | Acvr1b        | 0.55 | 7.68E-07 | 2.53E-05 |
| 17448821 | Ociad2        | 0.55 | 9.28E-06 | 1.74E-04 |
| 17273864 | Apob          | 0.55 | 6.35E-05 | 7.87E-04 |
| 17467806 | Tcf7l1        | 0.55 | 4.03E-06 | 9.13E-05 |
| 17374738 | Gchfr         | 0.55 | 8.20E-07 | 2.65E-05 |
| 17458338 | Al854703      | 0.55 | 1.94E-05 | 3.16E-04 |
| 17217651 | Tnnt2         | 0.55 | 1.73E-05 | 2.89E-04 |
| 17374455 | Spred1        | 0.55 | 3.36E-06 | 7.88E-05 |
| 17222356 | 2010300C02Rik | 0.55 | 9.62E-07 | 3.01E-05 |
| 17510136 | Ifi30         | 0.55 | 6.67E-07 | 2.31E-05 |
| 17226655 | C4bp          | 0.55 | 8.31E-05 | 9.80E-04 |
| 17338959 | Tnfsf9        | 0.55 | 9.36E-05 | 1.08E-03 |
| 17529871 | Acpl2         | 0.55 | 2.98E-05 | 4.42E-04 |
| 17374827 | 1700020I14Rik | 0.55 | 6.31E-06 | 1.30E-04 |
| 17491420 | Svip          | 0.55 | 7.05E-06 | 1.38E-04 |
| 17546259 | Ube1y1        | 0.55 | 9.49E-04 | 6.62E-03 |
| 17468286 | Cyp26b1       | 0.55 | 2.30E-04 | 2.18E-03 |
| 17517289 | Exph5         | 0.54 | 5.04E-04 | 3.99E-03 |
| 17212286 | Slc9a2        | 0.54 | 2.34E-07 | 1.05E-05 |
| 17375396 | Sord          | 0.54 | 6.76E-06 | 1.36E-04 |
| 17466441 | Fam115c       | 0.54 | 1.56E-04 | 1.62E-03 |
| 17231358 | lyd           | 0.54 | 1.30E-04 | 1.40E-03 |
| 17294135 | Srd5a1        | 0.54 | 3.15E-06 | 7.51E-05 |
| 17458355 | Gimap9        | 0.54 | 9.26E-05 | 1.07E-03 |
| 17425248 | Tmem246       | 0.54 | 3.45E-04 | 2.97E-03 |
| 17404047 | Zfp704        | 0.54 | 1.99E-06 | 5.25E-05 |
| 17449710 | Cxcl9         | 0.54 | 5.79E-04 | 4.46E-03 |
| 17410390 | Hadh          | 0.54 | 6.80E-08 | 4.01E-06 |
| 17360977 | Lrp5          | 0.54 | 2.36E-06 | 5.98E-05 |
| 17353962 | Fgf1          | 0.54 | 9.97E-06 | 1.84E-04 |
| 17440575 | Chek2         | 0.54 | 5.34E-05 | 6.85E-04 |
| 17511714 | Ces1e         | 0.54 | 4.52E-04 | 3.67E-03 |
| 17405142 | Setd7         | 0.54 | 4.13E-07 | 1.63E-05 |
| 17401673 | Sort1         | 0.54 | 1.26E-06 | 3.72E-05 |
| 17471107 | Plekhg6       | 0.54 | 8.39E-06 | 1.59E-04 |
| 17330799 | Gm5485        | 0.54 | 1.79E-07 | 8.48E-06 |
| 17302889 | Pcca          | 0.54 | 1.74E-06 | 4.80E-05 |
| 17519649 | Gsta4         | 0.54 | 8.93E-08 | 4.84E-06 |
| 17282498 | Entpd5        | 0.54 | 8.29E-08 | 4.59E-06 |
| 17478883 | Mcee          | 0.54 | 2.35E-06 | 5.97E-05 |

|          |               |      |          |          |
|----------|---------------|------|----------|----------|
| 17231366 | Plekhg1       | 0.54 | 4.48E-05 | 6.03E-04 |
| 17230484 | Ephx1         | 0.53 | 9.57E-07 | 3.00E-05 |
| 17489046 | Hcst          | 0.53 | 1.58E-04 | 1.63E-03 |
| 17322327 | Cbx5          | 0.53 | 2.14E-06 | 5.61E-05 |
| 17211405 | Gsta3         | 0.53 | 2.41E-04 | 2.26E-03 |
| 17327264 | Cbr3          | 0.53 | 2.10E-07 | 9.69E-06 |
| 17467269 | Hpgds         | 0.53 | 5.11E-04 | 4.04E-03 |
| 17500957 | Lrp2bp        | 0.53 | 1.25E-03 | 8.25E-03 |
| 17363799 | 5033414D02Rik | 0.53 | 7.79E-07 | 2.56E-05 |
| 17397957 | P2ry1         | 0.53 | 5.04E-08 | 3.17E-06 |
| 17294664 | Polr3g        | 0.53 | 6.82E-06 | 1.36E-04 |
| 17477391 | Klk1          | 0.53 | 3.26E-07 | 1.36E-05 |
| 17520364 | Plod2         | 0.53 | 2.85E-04 | 2.57E-03 |
| 17281084 | Egln3         | 0.53 | 2.30E-07 | 1.04E-05 |
| 17274813 | Slc26a3       | 0.53 | 9.11E-07 | 2.89E-05 |
| 17525578 | Slc37a2       | 0.53 | 1.19E-04 | 1.31E-03 |
| 17238054 | Ndufa4l2      | 0.53 | 1.67E-04 | 1.70E-03 |
| 17434524 | Abcb1a        | 0.53 | 5.32E-07 | 1.95E-05 |
| 17489989 | Al987944      | 0.53 | 8.53E-05 | 1.00E-03 |
| 17328277 | Pla2g10       | 0.53 | 2.19E-08 | 1.70E-06 |
| 17284963 | Marcksl1-ps4  | 0.52 | 1.05E-04 | 1.18E-03 |
| 17389795 | Ccdc32        | 0.52 | 7.89E-07 | 2.58E-05 |
| 17340307 | Msh6          | 0.52 | 2.29E-06 | 5.85E-05 |
| 17266107 | Abr           | 0.52 | 7.65E-07 | 2.53E-05 |
| 17449394 | Sult1b1       | 0.52 | 4.37E-07 | 1.69E-05 |
| 17225261 | Ngef          | 0.52 | 1.70E-05 | 2.85E-04 |
| 17367916 | Lrrc26        | 0.52 | 6.92E-08 | 4.07E-06 |
| 17243888 | Chpt1         | 0.52 | 6.70E-05 | 8.17E-04 |
| 17252058 | Tm4sf5        | 0.52 | 8.13E-07 | 2.64E-05 |
| 17487361 | Apoc2         | 0.52 | 2.32E-05 | 3.65E-04 |
| 17493869 | P2ry6         | 0.52 | 1.44E-05 | 2.50E-04 |
| 17420557 | Rnf186        | 0.52 | 6.65E-06 | 1.34E-04 |
| 17246860 | Nipsnap1      | 0.52 | 5.04E-06 | 1.09E-04 |
| 17283871 | Bcl11b        | 0.52 | 1.13E-04 | 1.25E-03 |
| 17359636 | Abcc2         | 0.52 | 2.56E-06 | 6.36E-05 |
| 17501041 | Casp3         | 0.52 | 3.12E-05 | 4.57E-04 |
| 17388332 | Creb3l1       | 0.52 | 4.11E-08 | 2.77E-06 |
| 17548296 | LOC100503320  | 0.52 | 5.88E-08 | 3.58E-06 |
| 17312186 | PscA          | 0.52 | 4.89E-05 | 6.41E-04 |
| 17251607 | Trappc1       | 0.52 | 2.75E-07 | 1.19E-05 |
| 17388974 | Depdc7        | 0.51 | 2.08E-04 | 2.02E-03 |
| 17501787 | Tm6sf2        | 0.51 | 3.81E-06 | 8.70E-05 |
| 17219231 | Nr1i3         | 0.51 | 4.16E-08 | 2.78E-06 |
| 17329220 | Ehhadh        | 0.51 | 1.21E-05 | 2.16E-04 |
| 17388803 | Cat           | 0.51 | 3.40E-08 | 2.41E-06 |



|          |               |      |          |          |
|----------|---------------|------|----------|----------|
| 17433328 | Per3          | 0.51 | 5.58E-07 | 2.01E-05 |
| 17241954 | Gstt2         | 0.51 | 2.09E-05 | 3.34E-04 |
| 17309802 | Oxct1         | 0.51 | 2.34E-08 | 1.77E-06 |
| 17376191 | Tgm3          | 0.51 | 4.75E-07 | 1.79E-05 |
| 17495958 | Ern2          | 0.51 | 2.19E-07 | 1.00E-05 |
| 17520353 | Plscr4        | 0.51 | 8.84E-05 | 1.03E-03 |
| 17475725 | Zfp607        | 0.51 | 2.53E-04 | 2.35E-03 |
| 17445860 | Napepld       | 0.51 | 4.41E-07 | 1.70E-05 |
| 17539682 | BC022960      | 0.51 | 6.65E-04 | 4.96E-03 |
| 17340967 | Acat2         | 0.51 | 8.08E-07 | 2.63E-05 |
| 17289103 | Serinc5       | 0.51 | 3.05E-07 | 1.29E-05 |
| 17496839 | Pycard        | 0.51 | 1.83E-08 | 1.50E-06 |
| 17375997 | Mertk         | 0.51 | 1.68E-04 | 1.71E-03 |
| 17265340 | Camta2        | 0.50 | 6.23E-08 | 3.74E-06 |
| 17317284 | Anxa13        | 0.50 | 1.50E-06 | 4.29E-05 |
| 17307463 | Ebpl          | 0.50 | 9.76E-06 | 1.81E-04 |
| 17508036 | Slc25a15      | 0.50 | 5.61E-06 | 1.19E-04 |
| 17284919 | Akr1c14       | 0.50 | 4.41E-04 | 3.60E-03 |
| 17514799 | 2200002K05Rik | 0.50 | 1.15E-07 | 6.06E-06 |
| 17535951 | Fundc2        | 0.50 | 6.35E-05 | 7.87E-04 |
| 17285244 | Nid1          | 0.50 | 6.25E-08 | 3.74E-06 |
| 17255853 | Cisd3         | 0.50 | 3.71E-08 | 2.58E-06 |
| 17485357 | Dhcr7         | 0.50 | 7.09E-07 | 2.42E-05 |
| 17506707 | Rab4a         | 0.49 | 1.20E-05 | 2.16E-04 |
| 17396162 | Car2          | 0.49 | 1.19E-08 | 1.11E-06 |
| 17496354 | Sult1a1       | 0.49 | 8.37E-05 | 9.86E-04 |
| 17311807 | Sqle          | 0.49 | 6.23E-08 | 3.74E-06 |
| 17527421 | Tspan3        | 0.49 | 8.64E-08 | 4.71E-06 |
| 17476728 | Cebpa         | 0.49 | 1.55E-07 | 7.59E-06 |
| 17327255 | Cbr1          | 0.49 | 1.80E-08 | 1.49E-06 |
| 17251441 | Slc25a35      | 0.49 | 5.12E-06 | 1.10E-04 |
| 17326964 | Hunk          | 0.49 | 4.94E-06 | 1.08E-04 |
| 17484477 | Prap1         | 0.49 | 1.22E-04 | 1.33E-03 |
| 17449406 | Sult1d1       | 0.49 | 7.75E-08 | 4.43E-06 |
| 17539494 | Ace2          | 0.49 | 7.48E-06 | 1.44E-04 |
| 17515315 | Ldlr          | 0.49 | 1.07E-08 | 1.02E-06 |
| 17309557 | Slc15a1       | 0.49 | 5.40E-05 | 6.91E-04 |
| 17227086 | Gm19497       | 0.49 | 3.06E-06 | 7.37E-05 |
| 17295386 | Tmem171       | 0.49 | 5.98E-06 | 1.24E-04 |
| 17220591 | 5033404E19Rik | 0.49 | 5.11E-05 | 6.59E-04 |
| 17399769 | S100a13       | 0.49 | 7.51E-08 | 4.37E-06 |
| 17480788 | Fchsd2        | 0.49 | 5.88E-07 | 2.08E-05 |
| 17289324 | Gcnt4         | 0.49 | 1.41E-06 | 4.06E-05 |
| 17433672 | 2810405K02Rik | 0.48 | 2.70E-08 | 1.97E-06 |
| 17526307 | Gm10023       | 0.48 | 1.17E-05 | 2.10E-04 |

|          |               |      |          |          |
|----------|---------------|------|----------|----------|
| 17366670 | Itih5         | 0.48 | 2.08E-08 | 1.63E-06 |
| 17540378 | Maob          | 0.48 | 3.20E-04 | 2.81E-03 |
| 17272468 | St6galnac2    | 0.48 | 4.07E-08 | 2.77E-06 |
| 17283556 | Ifi27l2b      | 0.48 | 1.80E-06 | 4.91E-05 |
| 17313087 | Mgat3         | 0.48 | 4.85E-09 | 5.92E-07 |
| 17357815 | Fam111a       | 0.48 | 6.38E-05 | 7.89E-04 |
| 17440054 | A830010M20Rik | 0.48 | 2.27E-07 | 1.03E-05 |
| 17456736 | Ahcyl2        | 0.48 | 1.53E-07 | 7.54E-06 |
| 17466581 | Zfp467        | 0.48 | 4.04E-05 | 5.57E-04 |
| 17231999 | Myb           | 0.48 | 4.81E-06 | 1.06E-04 |
| 17487001 | Hif3a         | 0.48 | 7.56E-08 | 4.38E-06 |
| 17232135 | 1110021L09Rik | 0.47 | 4.02E-08 | 2.76E-06 |
| 17493436 | 1810020D17Rik | 0.47 | 1.24E-06 | 3.69E-05 |
| 17530990 | Gnat1         | 0.47 | 1.61E-06 | 4.54E-05 |
| 17353358 | Stard4        | 0.47 | 1.66E-07 | 8.01E-06 |
| 17291355 | Acot13        | 0.47 | 1.38E-07 | 6.92E-06 |
| 17295233 | Hmgcr         | 0.47 | 1.08E-09 | 2.15E-07 |
| 17318983 | Tst           | 0.47 | 1.78E-08 | 1.48E-06 |
| 17491636 | D7Ertd715e    | 0.47 | 3.50E-04 | 3.00E-03 |
| 17404534 | Lrrc31        | 0.47 | 1.97E-05 | 3.19E-04 |
| 17442719 | Aacs          | 0.47 | 2.56E-07 | 1.13E-05 |
| 17337089 | H2-Q1         | 0.46 | 8.54E-06 | 1.61E-04 |
| 17284948 | Akr1c19       | 0.46 | 1.48E-05 | 2.55E-04 |
| 17340135 | Slc3a1        | 0.46 | 7.18E-08 | 4.19E-06 |
| 17534960 | Fhl1          | 0.46 | 7.93E-08 | 4.44E-06 |
| 17536961 | Chic1         | 0.46 | 2.48E-05 | 3.81E-04 |
| 17473580 | Zfp667        | 0.46 | 1.05E-04 | 1.18E-03 |
| 17217625 | Tnni1         | 0.46 | 7.36E-06 | 1.43E-04 |
| 17339910 | Galm          | 0.46 | 4.11E-07 | 1.63E-05 |
| 17443486 | Cldn15        | 0.46 | 5.53E-07 | 2.01E-05 |
| 17239384 | Phactr2       | 0.46 | 2.18E-06 | 5.66E-05 |
| 17447831 | Fgfbp1        | 0.45 | 1.88E-09 | 3.12E-07 |
| 17457853 | Sval1         | 0.45 | 1.11E-06 | 3.35E-05 |
| 17243392 | Gna11         | 0.45 | 5.28E-09 | 6.26E-07 |
| 17534528 | Xpnpep2       | 0.45 | 8.70E-08 | 4.73E-06 |
| 17288467 | Lpcat1        | 0.45 | 9.46E-05 | 1.09E-03 |
| 17321780 | Cela1         | 0.45 | 1.96E-07 | 9.15E-06 |
| 17399936 | Crnn          | 0.45 | 1.58E-04 | 1.63E-03 |
| 17257906 | Map2k6        | 0.45 | 1.23E-05 | 2.19E-04 |
| 17448001 | Ppargc1a      | 0.45 | 3.79E-07 | 1.52E-05 |
| 17277760 | 5430427M07Rik | 0.45 | 1.42E-05 | 2.47E-04 |
| 17340427 | LOC100044193  | 0.45 | 4.02E-04 | 3.33E-03 |
| 17267011 | Gm11437       | 0.45 | 3.12E-04 | 2.75E-03 |
| 17367095 | Tmem236       | 0.44 | 1.35E-09 | 2.56E-07 |
| 17235990 | 1500009L16Rik | 0.44 | 2.99E-06 | 7.26E-05 |

|          |               |      |          |          |
|----------|---------------|------|----------|----------|
| 17464539 | Hepacam2      | 0.44 | 2.63E-06 | 6.51E-05 |
| 17466322 | Trpv6         | 0.44 | 1.40E-08 | 1.24E-06 |
| 17248476 | Pank3         | 0.44 | 2.90E-09 | 4.09E-07 |
| 17409130 | Gstm3         | 0.44 | 6.75E-07 | 2.34E-05 |
| 17489801 | Nudt19        | 0.44 | 1.34E-07 | 6.75E-06 |
| 17255466 | Gngt2         | 0.44 | 1.62E-06 | 4.54E-05 |
| 17299559 | Pnp2          | 0.43 | 2.22E-06 | 5.74E-05 |
| 17409154 | Gstm1         | 0.43 | 1.08E-04 | 1.21E-03 |
| 17490589 | Fcgrt         | 0.43 | 2.69E-07 | 1.18E-05 |
| 17284913 | Tubal3        | 0.43 | 1.34E-05 | 2.34E-04 |
| 17354739 | Ppargc1b      | 0.43 | 6.55E-08 | 3.87E-06 |
| 17316392 | Hrsp12        | 0.43 | 2.80E-06 | 6.85E-05 |
| 17288716 | Glrx          | 0.43 | 3.43E-07 | 1.41E-05 |
| 17280817 | Scin          | 0.43 | 1.52E-08 | 1.31E-06 |
| 17351811 | Acaa2         | 0.43 | 2.48E-09 | 3.64E-07 |
| 17448245 | Tlr1          | 0.42 | 1.30E-07 | 6.61E-06 |
| 17307134 | Cryl1         | 0.42 | 1.91E-08 | 1.54E-06 |
| 17525894 | Sorl1         | 0.42 | 1.80E-08 | 1.49E-06 |
| 17363429 | Aldh1a7       | 0.42 | 1.12E-04 | 1.24E-03 |
| 17345989 | Sult1c2       | 0.42 | 2.44E-06 | 6.14E-05 |
| 17373283 | Lrp4          | 0.42 | 1.68E-07 | 8.08E-06 |
| 17512732 | Nqo1          | 0.42 | 3.43E-07 | 1.41E-05 |
| 17429057 | Ptprf         | 0.42 | 1.62E-09 | 2.86E-07 |
| 17394694 | B4galt5       | 0.42 | 4.78E-09 | 5.92E-07 |
| 17290163 | Ccl28         | 0.42 | 7.60E-08 | 4.39E-06 |
| 17261963 | Fabp6         | 0.42 | 1.90E-05 | 3.10E-04 |
| 17403070 | Adh1          | 0.42 | 1.06E-08 | 1.02E-06 |
| 17404091 | Fabp4         | 0.41 | 5.71E-04 | 4.41E-03 |
| 17500543 | Ppp1r3b       | 0.41 | 2.42E-08 | 1.80E-06 |
| 17417946 | Guca2a        | 0.41 | 2.41E-08 | 1.80E-06 |
| 17488057 | Cyp2s1        | 0.41 | 4.16E-07 | 1.63E-05 |
| 17511731 | Ces1f         | 0.41 | 8.43E-05 | 9.91E-04 |
| 17236182 | Timp3         | 0.41 | 6.81E-07 | 2.35E-05 |
| 17409142 | Gstm2         | 0.41 | 6.10E-06 | 1.26E-04 |
| 17250055 | 1810065E05Rik | 0.41 | 4.13E-08 | 2.77E-06 |
| 17297750 | Ppif          | 0.41 | 3.71E-08 | 2.58E-06 |
| 17346401 | Acer1         | 0.41 | 4.80E-07 | 1.80E-05 |
| 17437459 | Slc34a2       | 0.41 | 1.09E-06 | 3.32E-05 |
| 17496584 | Zg16          | 0.40 | 8.82E-07 | 2.82E-05 |
| 17435584 | Insig1        | 0.40 | 2.36E-09 | 3.59E-07 |
| 17416325 | Dhcr24        | 0.40 | 3.28E-10 | 1.07E-07 |
| 17364150 | Pank1         | 0.40 | 6.86E-07 | 2.35E-05 |
| 17236393 | Slc5a8        | 0.40 | 7.83E-08 | 4.44E-06 |
| 17315002 | Mettl7a1      | 0.40 | 3.05E-05 | 4.50E-04 |
| 17484670 | Nlrp6         | 0.40 | 3.54E-07 | 1.45E-05 |

|          |               |      |          |          |
|----------|---------------|------|----------|----------|
| 17504467 | Pdp2          | 0.40 | 7.67E-07 | 2.53E-05 |
| 17457876 | Gstk1         | 0.40 | 2.90E-06 | 7.04E-05 |
| 17359251 | Cyp2c65       | 0.39 | 3.43E-07 | 1.41E-05 |
| 17324835 | Tfrc          | 0.39 | 1.31E-07 | 6.61E-06 |
| 17294934 | Thbs4         | 0.39 | 4.11E-09 | 5.35E-07 |
| 17364440 | Cyp2c69       | 0.39 | 5.31E-05 | 6.82E-04 |
| 17345066 | Mep1a         | 0.39 | 5.32E-09 | 6.26E-07 |
| 17260644 | Ddc           | 0.38 | 2.32E-08 | 1.77E-06 |
| 17504829 | Hsd11b2       | 0.38 | 7.88E-08 | 4.44E-06 |
| 17358664 | A1cf          | 0.38 | 7.35E-07 | 2.47E-05 |
| 17319091 | Lgals2        | 0.37 | 6.92E-06 | 1.37E-04 |
| 17321078 | Vdr           | 0.37 | 1.49E-10 | 6.06E-08 |
| 17310816 | Cmbl          | 0.37 | 1.01E-08 | 9.82E-07 |
| 17408336 | Hsd3b3        | 0.37 | 8.27E-07 | 2.67E-05 |
| 17413674 | Aldh1b1       | 0.37 | 3.77E-09 | 4.98E-07 |
| 17464400 | Rep15         | 0.37 | 5.37E-08 | 3.30E-06 |
| 17273348 | Fasn          | 0.37 | 1.34E-09 | 2.56E-07 |
| 17402558 | Elovl6        | 0.37 | 5.54E-08 | 3.40E-06 |
| 17280062 | Lpin1         | 0.36 | 4.46E-06 | 9.92E-05 |
| 17309785 | Sepp1         | 0.36 | 3.61E-09 | 4.85E-07 |
| 17312567 | Gpt           | 0.36 | 6.63E-06 | 1.34E-04 |
| 17450838 | Rnf212        | 0.36 | 7.37E-07 | 2.47E-05 |
| 17306147 | Ndrp2         | 0.36 | 4.82E-08 | 3.08E-06 |
| 17425609 | D630039A03Rik | 0.36 | 1.43E-06 | 4.10E-05 |
| 17504572 | Ces2g         | 0.35 | 2.88E-06 | 7.02E-05 |
| 17331828 | Cldn8         | 0.35 | 1.23E-06 | 3.65E-05 |
| 17513092 | Fa2h          | 0.35 | 3.62E-10 | 1.11E-07 |
| 17342038 | Fahd1         | 0.35 | 5.41E-09 | 6.31E-07 |
| 17476288 | Cox7a1        | 0.35 | 1.74E-09 | 2.91E-07 |
| 17295278 | Hexb          | 0.35 | 6.59E-09 | 7.15E-07 |
| 17235730 | 2210404O07Rik | 0.35 | 6.33E-09 | 6.96E-07 |
| 17362839 | Ms4a10        | 0.35 | 1.61E-09 | 2.86E-07 |
| 17450937 | 4930522L14Rik | 0.35 | 1.99E-04 | 1.96E-03 |
| 17459696 | Gm15401       | 0.34 | 1.27E-08 | 1.16E-06 |
| 17290173 | Hmgcs1        | 0.34 | 5.12E-11 | 2.81E-08 |
| 17504512 | Ces2c         | 0.34 | 3.57E-08 | 2.50E-06 |
| 17472114 | Plbd1         | 0.34 | 1.01E-08 | 9.82E-07 |
| 17507605 | Gas6          | 0.34 | 6.67E-10 | 1.57E-07 |
| 17400773 | Fmo5          | 0.34 | 4.23E-08 | 2.81E-06 |
| 17362861 | Ms4a18        | 0.34 | 4.40E-06 | 9.81E-05 |
| 17456161 | Cav1          | 0.33 | 1.34E-07 | 6.75E-06 |
| 17319707 | Cyp2d26       | 0.33 | 3.40E-08 | 2.41E-06 |
| 17348860 | Mep1b         | 0.33 | 1.43E-09 | 2.68E-07 |
| 17325884 | Cd200r2       | 0.32 | 5.26E-04 | 4.13E-03 |
| 17404122 | Slc10a5       | 0.32 | 1.97E-07 | 9.15E-06 |

|          |               |      |          |          |
|----------|---------------|------|----------|----------|
| 17493461 | Aqp11         | 0.31 | 2.13E-10 | 7.84E-08 |
| 17506532 | Dpep1         | 0.31 | 6.20E-09 | 6.90E-07 |
| 17482752 | 2010110P09Rik | 0.31 | 3.85E-10 | 1.16E-07 |
| 17480044 | Prss23        | 0.31 | 2.39E-09 | 3.59E-07 |
| 17539979 | Glod5         | 0.31 | 2.40E-09 | 3.59E-07 |
| 17458407 | Abp1          | 0.31 | 2.55E-10 | 8.99E-08 |
| 17482897 | Aqp8          | 0.30 | 1.93E-08 | 1.54E-06 |
| 17394063 | Ada           | 0.30 | 2.50E-10 | 8.99E-08 |
| 17253181 | Tmigd1        | 0.30 | 1.95E-09 | 3.14E-07 |
| 17311893 | Gsdmcl-ps     | 0.30 | 2.75E-07 | 1.19E-05 |
| 17279509 | Crip1         | 0.30 | 2.78E-11 | 2.14E-08 |
| 17470095 | Fxyd4         | 0.29 | 5.27E-07 | 1.94E-05 |
| 17343488 | Cyp4f14       | 0.28 | 1.48E-09 | 2.74E-07 |
| 17526663 | Fam55b        | 0.27 | 3.44E-06 | 8.03E-05 |
| 17520631 | Rbp2          | 0.27 | 5.17E-10 | 1.42E-07 |
| 17355443 | Lipg          | 0.27 | 1.41E-07 | 6.94E-06 |
| 17504541 | Ces2e         | 0.27 | 4.54E-11 | 2.74E-08 |
| 17475870 | Sycn          | 0.26 | 4.90E-09 | 5.92E-07 |
| 17322075 | Krt4          | 0.26 | 2.23E-06 | 5.75E-05 |
| 17252183 | Eno3          | 0.25 | 7.40E-11 | 3.48E-08 |
| 17322750 | Abat          | 0.25 | 6.29E-09 | 6.95E-07 |
| 17516978 | Fam55d        | 0.23 | 5.98E-09 | 6.74E-07 |
| 17504477 | Ces2a         | 0.23 | 1.33E-06 | 3.89E-05 |
| 17225210 | Alpi          | 0.23 | 1.73E-09 | 2.91E-07 |
| 17329847 | Osta          | 0.23 | 2.61E-10 | 9.00E-08 |
| 17408360 | Hao2          | 0.22 | 8.00E-10 | 1.78E-07 |
| 17348833 | Ttr           | 0.22 | 3.18E-10 | 1.07E-07 |
| 17545899 | S100g         | 0.20 | 5.61E-10 | 1.48E-07 |
| 17400862 | Hmgcs2        | 0.20 | 2.46E-09 | 3.64E-07 |
| 17397750 | Tm4sf4        | 0.20 | 3.23E-10 | 1.07E-07 |
| 17507829 | Defb37        | 0.18 | 4.45E-06 | 9.92E-05 |
| 17503926 | Mt4           | 0.18 | 4.14E-07 | 1.63E-05 |
| 17359239 | Cyp2c55       | 0.17 | 3.58E-11 | 2.40E-08 |
| 17317442 | Gsdmc2        | 0.17 | 5.57E-07 | 2.01E-05 |
| 17425233 | Aldob         | 0.14 | 1.09E-09 | 2.15E-07 |
| 17360785 | Pnliprp2      | 0.14 | 9.82E-10 | 1.98E-07 |
| 17402350 | Fabp2         | 0.08 | 2.17E-13 | 7.08E-10 |

**Supplementary Table 3: IL22 and tunicamycin responsive genes in mouse colonoids.** 2689 genes are differentially expressed (q-value  $\leq$  0.01) after treatment with IL22 and tunicamycin combination. The data are sorted by decreasing values of the estimated expression fold change relative to control samples.
